# Supplementary material for: Origins of regioselectivity in Ni-catalyzed hydrofunctionalization of alkenes via ligand-to-ligand hydrogen transfer mechanism
Source: Royal Society of Chemistry journal article supplement (doi:10.1039/d2cc02691k), 2022-01-01
Supplement: d2cc02691k1.pdf [file d2cc02691k1.pdf]

## Electronic Supplementary Information

### Origins of regioselectivity in Ni-catalyzed hydrofunctionalization of alkenes via ligand-to-ligand hydrogen transfer mechanism

Han Gao<sup>a</sup>, Lingfei Hu<sup>a</sup>, Yanlei Hu<sup>a</sup>, Xiangying Lv<sup>a</sup>, Yan-Bo Wu<sup>b</sup> and Gang Lu<sup>\*,a</sup>

<sup>a</sup> School of Chemistry and Chemical Engineering, Key Laboratory of Colloid and Interface Chemistry, Ministry of Education, Shandong University, Jinan, Shandong 250100, China

<sup>b</sup> Key Lab for Materials of Energy Conversion and Storage of Shanxi Province and Key Lab of Chemical Biology and Molecular Engineering of Ministry of Education, Institute of Molecular Science, Shanxi University, Taiyuan, Shanxi 030006, China

Corresponding Author: [ganglu@sdu.edu.cn](mailto:ganglu@sdu.edu.cn)

#### Table of Contents

|                                                                          |     |
|--------------------------------------------------------------------------|-----|
| Computational Details.....                                               | S2  |
| Competing LLHT and Oxidative Addition Pathways.....                      | S3  |
| COVPs Results for TS1 and TS2.....                                       | S4  |
| EDA Results along IRC for TS3 and TS4 and NCI Plots .....                | S5  |
| EDA Results along IRC for TS7 and TS8 .....                              | S6  |
| Energy Terms of EDA along IRC .....                                      | S7  |
| Additional Discussions of Computational Results .....                    | S11 |
| Cartesian Coordinates (Å) and Energies of the Optimized Structures ..... | S20 |
| References.....                                                          | S89 |

## Computational Details

The B3LYP density function and a mixed basis set of LANL2DZ for Ni and 6-31g(d) for other atoms were used for geometry optimizations for all intermediates and transition states. All minima have zero imaginary frequency and all transition states have only one imaginary frequency and were confirmed by intrinsic reaction coordinate (IRC) calculations. Single-point energies were calculated by using M06 and the def2-TZVP basis set. Solvation energy corrections were calculated using the SMD model<sup>1</sup> with the solvents used in experiments. All these calculations were carried out with Gaussian 09.<sup>2</sup>

Energy decomposition analysis (EDA) calculations at the M06/def2-TZVP level of theory were performed by using the second-generation EDA based on absolutely localized orbitals (ALMO-EDA2) implemented in Q-Chem 5.2.<sup>3</sup> The complementary occupied-virtual pairs (COVPs) were computed to figure out the direction of charge transfer and the most significant orbitals. To minimize the effect of early or late transition states in comparing each energy term among the LLHT transition states, we performed EDA calculations along the reaction coordinates obtained from IRC calculations. The reported energies in the bar charts are the average of  $\Delta\Delta E$  values at the region of X–H (X = O, C) bond distances that correspond to the two regioisomeric LLHT transition states. The orbitals were visualized using IQmol (isovalue = 0.08 Å<sup>-3</sup>).

## Competing LLHT and Oxidative Addition Pathways

As shown in Fig. S1, for the Ni-catalyzed hydrofunctionalization of alkenes with MeOH, aldehyde, benzene and pyridine, the LLHT pathways (in black and blue) are superior to the pathway of oxidative addition followed by migratory insertion (in red). This suggests that the regioselectivity is determined by the LLHT pathway.

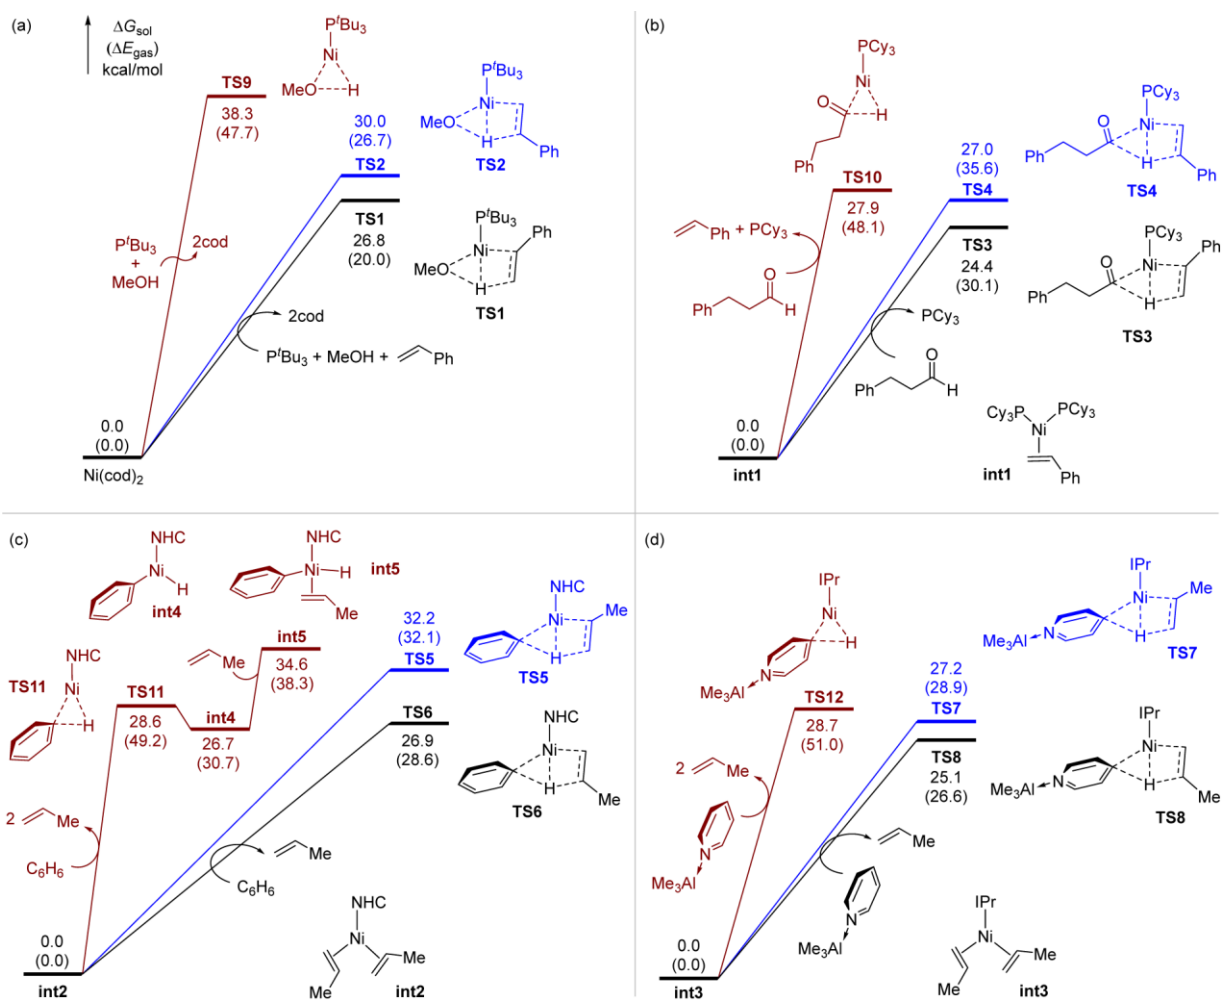

**Fig. S1.** Energy profiles for LLHT and oxidative addition pathways.

## COVPs Results for TS1 and TS2

The most significant donor-acceptor interaction in **TS1** and **TS2** is from the combination of O–H  $\sigma$  and Ni occupied d orbitals (i.e.,  $\sigma+d$ ) to styrene  $\pi^*$  orbital, which has been discussed in the main text (Fig. 1c). The other direction of charge transfer, i.e., from styrene  $\pi$  orbital to O–H  $\sigma^*$  and Ni empty d orbitals, is stronger in **TS1** than in **TS2** (Fig. S2). This also contributes to the lower barrier of branched-selective **TS1**.

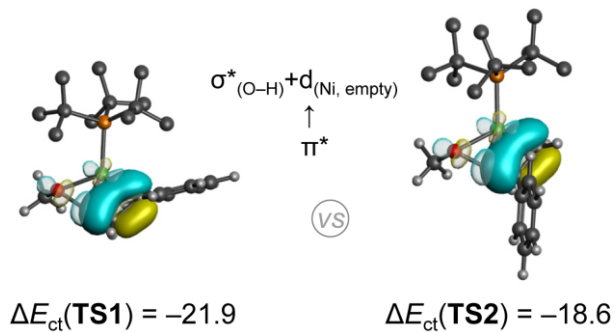

**Fig. S2.** Difference of charge transfer from  $\pi_{(\text{C}=\text{C})} \rightarrow \sigma^*_{(\text{O-H})} + d_{(\text{Ni, empty})}$  in **TS1** and **TS2**. Energies are given in kcal/mol.

## EDA Results along IRC for TS3 and TS4 and NCI Plots

The EDA result along IRC shows that the charge transfer ( $\Delta E_{ct}$ ) and dispersion ( $\Delta E_{disp}$ ) energies are the positive contributors to the lower barrier of **TS3** than **TS4** (Fig. S3a). As shown in Fig. S3b, the COVPs results indicate the orbital interaction of  $\sigma+d_{occupied} \rightarrow \pi^*$  is the most significant donor-acceptor interaction for stabilizing the branched-selective **TS3**. The orbital interaction of  $\pi \rightarrow \sigma^*+d_{empty}$  also contributes to the lower barrier of **TS3**.

The dispersion interactions in **TS3** and **TS4** can be described by using NCI plots. As shown in Fig. S4, there are greater non-covalent interactions in **TS3** between PCy<sub>3</sub> and styrene (the larger green slice) than those in **TS4** (the smaller green slice), which is consistent with the computed larger dispersion energy in **TS3** than **TS4**. This is because the styrene phenyl group is proximal to the PCy<sub>3</sub> ligand in **TS3** while the phenyl group is distal to the ligand in **TS4**.

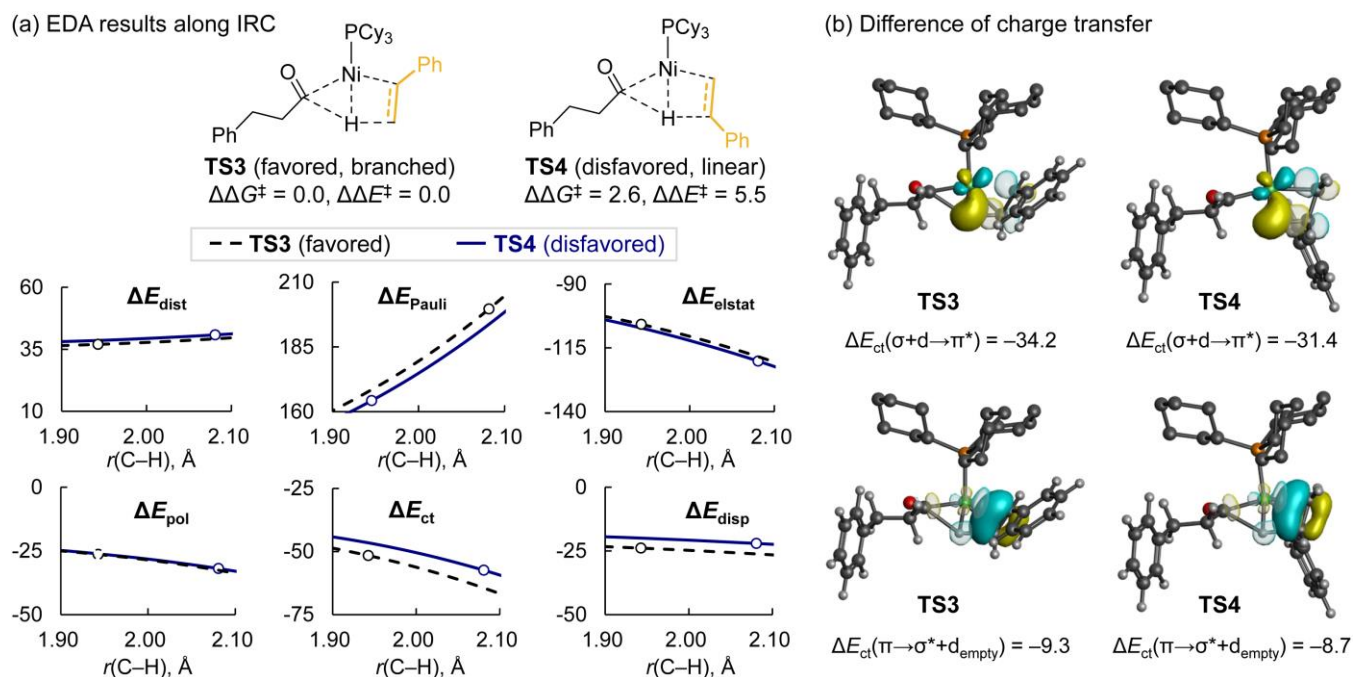

**Fig. S3.** EDA results for the two regioisomeric LLHT transition states with aldehyde and styrene. Energies are given in kcal/mol.

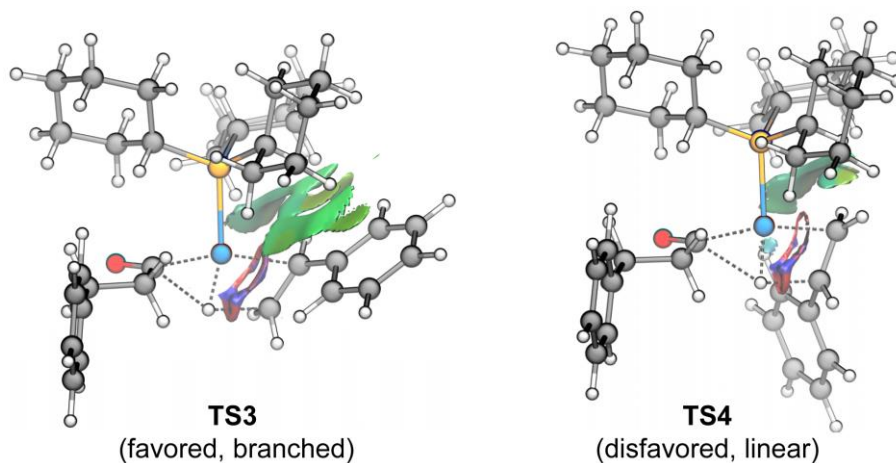

**Fig. S4.** The NCI plot between PCy<sub>3</sub>Ni/aldehyde and styrene in **TS3** and **TS4**.

## EDA Results along IRC for TS7 and TS8

As shown in Fig. S5, the EDA result along IRC shows that the lower barrier of **TS8** than **TS7** is mostly due to the weaker destabilizing effects, including distortion ( $\Delta E_{\text{dist}}$ ) and Pauli repulsion ( $\Delta E_{\text{Pauli}}$ ).

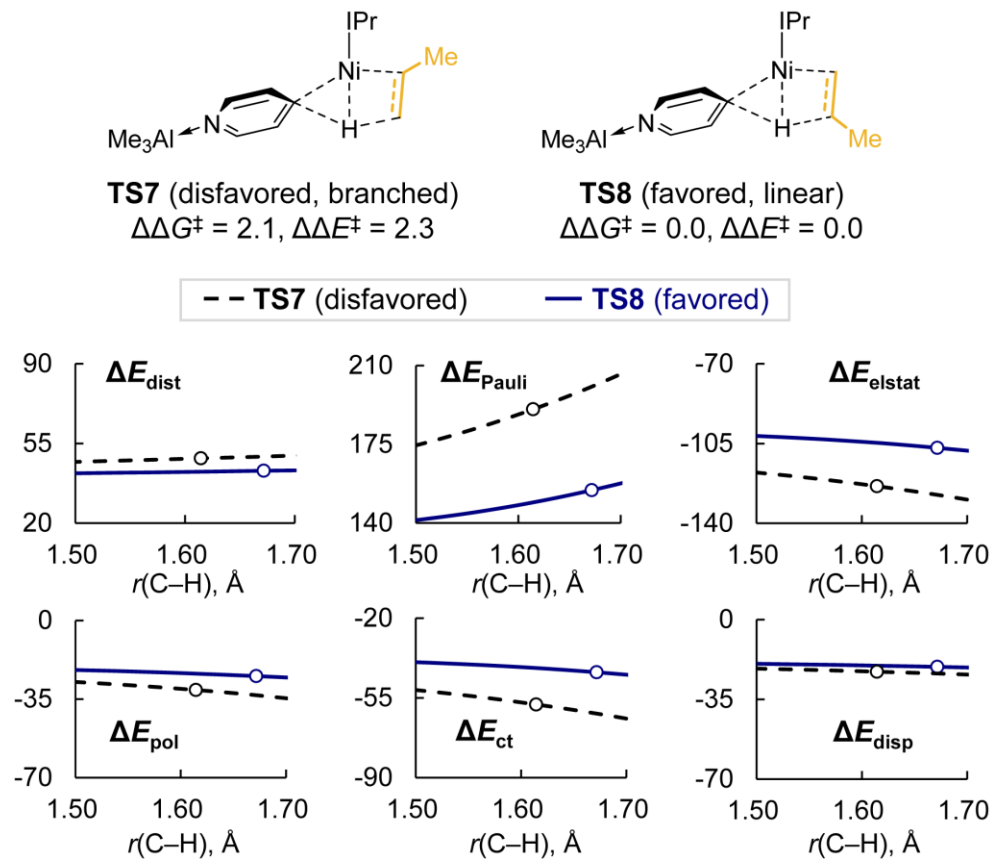

**Fig. S5.** EDA results for the two regioisomeric LLHT transition states with pyridine/ $\text{AlMe}_3$  and propene. Energies are given in kcal/mol.

## Energy Terms of EDA along IRC

**Table S1. EDA energy terms of TS1 along IRC**

| $r(\text{O-H})$<br>in <b>TS1</b> (in Å) | Energy terms<br>(in kcal/mol) | $\Delta E_{\text{dist}}$ | $\Delta E_{\text{Pauli}}$ | $\Delta E_{\text{ct}}$ | $\Delta E_{\text{elstat}}$ | $\Delta E_{\text{pol}}$ | $\Delta E_{\text{disp}}$ |
|-----------------------------------------|-------------------------------|--------------------------|---------------------------|------------------------|----------------------------|-------------------------|--------------------------|
| 1.24                                    |                               | 69.6                     | 264.2                     | -105.3                 | -175.7                     | -48.6                   | -19.2                    |
| 1.29                                    |                               | 72.8                     | 277.8                     | -110.8                 | -179.8                     | -53.3                   | -20.1                    |
| 1.35                                    |                               | 75.7                     | 293.3                     | -116.6                 | -184.4                     | -58.9                   | -21.1                    |
| 1.40(TS)                                |                               | 78.1                     | 310.4                     | -122.6                 | -189.2                     | -65.7                   | -22.2                    |
| 1.45                                    |                               | 80.2                     | 329.8                     | -128.9                 | -194.7                     | -73.9                   | -23.4                    |
| 1.50                                    |                               | 82.0                     | 349.8                     | -135.2                 | -200.0                     | -83.2                   | -24.6                    |
| 1.55                                    |                               | 83.7                     | 365.0                     | -140.0                 | -203.4                     | -91.3                   | -25.7                    |
| 1.59                                    |                               | 85.1                     | 378.2                     | -144.0                 | -205.7                     | -99.0                   | -26.6                    |

**Table S2. EDA energy terms of TS2 along IRC**

| $r(\text{O-H})$<br>in <b>TS2</b> (in Å) | Energy terms<br>(in kcal/mol) | $\Delta E_{\text{dist}}$ | $\Delta E_{\text{Pauli}}$ | $\Delta E_{\text{ct}}$ | $\Delta E_{\text{elstat}}$ | $\Delta E_{\text{pol}}$ | $\Delta E_{\text{disp}}$ |
|-----------------------------------------|-------------------------------|--------------------------|---------------------------|------------------------|----------------------------|-------------------------|--------------------------|
| 1.22                                    |                               | 68.2                     | 258.8                     | -98.0                  | -176.7                     | -46.3                   | -16.4                    |
| 1.27                                    |                               | 71.4                     | 269.4                     | -102.4                 | -179.9                     | -49.7                   | -17.2                    |
| 1.32                                    |                               | 74.2                     | 282.0                     | -107.1                 | -183.7                     | -54.0                   | -18.1                    |
| 1.38                                    |                               | 76.6                     | 296.5                     | -112.2                 | -188.1                     | -59.2                   | -19.1                    |
| 1.43(TS)                                |                               | 78.6                     | 312.9                     | -117.5                 | -193.0                     | -65.5                   | -20.2                    |
| 1.48                                    |                               | 80.2                     | 331.6                     | -123.2                 | -198.6                     | -73.3                   | -21.3                    |
| 1.54                                    |                               | 81.6                     | 351.5                     | -128.9                 | -204.3                     | -82.3                   | -22.5                    |
| 1.58                                    |                               | 82.9                     | 369.7                     | -133.7                 | -209.0                     | -91.7                   | -23.5                    |

**Table S3. EDA energy terms of TS3 along IRC**

| Energy terms<br>(in kcal/mol)<br>$r(\text{C-H})$<br>in <b>TS3</b> (in Å) | $\Delta E_{\text{dist}}$ | $\Delta E_{\text{Pauli}}$ | $\Delta E_{\text{ct}}$ | $\Delta E_{\text{elstat}}$ | $\Delta E_{\text{pol}}$ | $\Delta E_{\text{disp}}$ |
|--------------------------------------------------------------------------|--------------------------|---------------------------|------------------------|----------------------------|-------------------------|--------------------------|
| 1.85                                                                     | 36.1                     | 152.8                     | -45.8                  | -99.6                      | -23.6                   | -22.7                    |
| 1.90                                                                     | 36.5                     | 159.8                     | -48.4                  | -102.5                     | -24.8                   | -23.3                    |
| 1.94(TS)                                                                 | 37.0                     | 168.0                     | -51.6                  | -105.8                     | -26.3                   | -23.9                    |
| 1.99                                                                     | 37.6                     | 177.2                     | -55.3                  | -109.6                     | -28.1                   | -24.6                    |
| 2.04                                                                     | 38.4                     | 187.7                     | -59.6                  | -113.8                     | -30.2                   | -25.3                    |
| 2.08                                                                     | 39.3                     | 199.6                     | -64.6                  | -118.6                     | -32.7                   | -26.2                    |
| 2.13                                                                     | 40.3                     | 213.1                     | -70.2                  | -123.8                     | -35.7                   | -27.1                    |
| 2.17                                                                     | 41.5                     | 228.1                     | -76.6                  | -129.6                     | -39.3                   | -28.1                    |

**Table S4. EDA energy terms of TS4 along IRC**

| Energy terms<br>(in kcal/mol)<br>$r(\text{C-H})$<br>in <b>TS4</b> (in Å) | $\Delta E_{\text{dist}}$ | $\Delta E_{\text{Pauli}}$ | $\Delta E_{\text{ct}}$ | $\Delta E_{\text{elstat}}$ | $\Delta E_{\text{pol}}$ | $\Delta E_{\text{disp}}$ |
|--------------------------------------------------------------------------|--------------------------|---------------------------|------------------------|----------------------------|-------------------------|--------------------------|
| 1.86                                                                     | 37.8                     | 150.3                     | -42.2                  | -101.2                     | -23.6                   | -18.9                    |
| 1.90                                                                     | 38.1                     | 156.8                     | -44.2                  | -104.1                     | -24.8                   | -19.4                    |
| 1.95                                                                     | 38.6                     | 164.3                     | -46.7                  | -107.5                     | -26.2                   | -20.0                    |
| 1.99                                                                     | 39.2                     | 172.8                     | -49.7                  | -111.3                     | -27.8                   | -20.6                    |
| 2.04                                                                     | 40.0                     | 182.5                     | -53.3                  | -115.5                     | -29.7                   | -21.3                    |
| 2.08(TS)                                                                 | 40.8                     | 193.5                     | -57.4                  | -120.2                     | -31.9                   | -22.1                    |
| 2.13                                                                     | 41.8                     | 205.8                     | -62.2                  | -125.4                     | -34.5                   | -22.9                    |
| 2.17                                                                     | 43.0                     | 219.7                     | -67.6                  | -131.2                     | -37.7                   | -23.8                    |



**Table S5. EDA energy terms of TS5 along IRC**

| Energy terms<br>(in kcal/mol)<br>$r(\text{C-H})$<br>in <b>TS5</b> (in Å) | $\Delta E_{\text{dist}}$ | $\Delta E_{\text{Pauli}}$ | $\Delta E_{\text{ct}}$ | $\Delta E_{\text{elstat}}$ | $\Delta E_{\text{pol}}$ | $\Delta E_{\text{disp}}$ |
|--------------------------------------------------------------------------|--------------------------|---------------------------|------------------------|----------------------------|-------------------------|--------------------------|
| 1.22                                                                     | 55.9                     | 203.1                     | -59.0                  | -140.9                     | -31.6                   | -24.3                    |
| 1.31                                                                     | 58.3                     | 213.2                     | -63.3                  | -144.3                     | -33.9                   | -25.0                    |
| 1.37                                                                     | 59.7                     | 220.1                     | -66.2                  | -146.7                     | -35.6                   | -25.6                    |
| 1.42                                                                     | 61.1                     | 228.5                     | -69.5                  | -149.6                     | -37.8                   | -26.2                    |
| 1.47                                                                     | 62.3                     | 238.4                     | -73.3                  | -153.1                     | -40.4                   | -26.9                    |
| 1.53                                                                     | 63.5                     | 249.8                     | -77.5                  | -157.2                     | -43.5                   | -27.7                    |
| 1.58(TS)                                                                 | 64.7                     | 262.9                     | -82.2                  | -161.8                     | -47.3                   | -28.6                    |
| 1.63                                                                     | 65.9                     | 277.6                     | -87.4                  | -167.0                     | -51.9                   | -29.6                    |
| 1.69                                                                     | 67.1                     | 294.1                     | -93.0                  | -172.7                     | -57.4                   | -30.6                    |
| 1.84                                                                     | 71.7                     | 351.7                     | -111.2                 | -191.0                     | -81.0                   | -34.1                    |

**Table S6. EDA energy terms of TS6 along IRC**

| Energy terms<br>(in kcal/mol)<br>$r(\text{C-H})$<br>in <b>TS6</b> (in Å) | $\Delta E_{\text{dist}}$ | $\Delta E_{\text{Pauli}}$ | $\Delta E_{\text{ct}}$ | $\Delta E_{\text{elstat}}$ | $\Delta E_{\text{pol}}$ | $\Delta E_{\text{disp}}$ |
|--------------------------------------------------------------------------|--------------------------|---------------------------|------------------------|----------------------------|-------------------------|--------------------------|
| 1.28                                                                     | 51.6                     | 196.3                     | -56.2                  | -137.1                     | -31.7                   | -21.9                    |
| 1.39                                                                     | 53.9                     | 207.1                     | -60.3                  | -141.2                     | -34.1                   | -22.7                    |
| 1.44                                                                     | 55.0                     | 214.3                     | -62.9                  | -144.0                     | -35.9                   | -23.3                    |
| 1.49                                                                     | 56.0                     | 223.0                     | -66.0                  | -147.3                     | -38.0                   | -23.9                    |
| 1.55                                                                     | 57.0                     | 233.1                     | -69.6                  | -151.3                     | -40.6                   | -24.6                    |
| 1.60(TS)                                                                 | 58.1                     | 244.7                     | -73.7                  | -155.7                     | -43.7                   | -25.4                    |
| 1.65                                                                     | 59.1                     | 257.9                     | -78.3                  | -160.7                     | -47.4                   | -26.3                    |
| 1.71                                                                     | 60.1                     | 272.9                     | -83.3                  | -166.3                     | -51.9                   | -27.3                    |
| 1.76                                                                     | 61.2                     | 289.6                     | -88.9                  | -172.4                     | -57.5                   | -28.3                    |
| 1.81                                                                     | 62.4                     | 308.2                     | -94.8                  | -178.9                     | -64.2                   | -29.4                    |

**Table S7. EDA energy terms of TS7 along IRC**

| Energy terms<br>(in kcal/mol)<br>$r(\text{C-H})$<br>in <b>TS7</b> (in Å) | $\Delta E_{\text{dist}}$ | $\Delta E_{\text{Pauli}}$ | $\Delta E_{\text{ct}}$ | $\Delta E_{\text{elstat}}$ | $\Delta E_{\text{pol}}$ | $\Delta E_{\text{disp}}$ |
|--------------------------------------------------------------------------|--------------------------|---------------------------|------------------------|----------------------------|-------------------------|--------------------------|
| 1.40                                                                     | 45.5                     | 164.6                     | -47.6                  | -114.1                     | -25.2                   | -20.6                    |
| 1.45                                                                     | 46.3                     | 169.6                     | -49.6                  | -115.9                     | -26.3                   | -21.1                    |
| 1.51                                                                     | 47.0                     | 175.5                     | -51.9                  | -118.1                     | -27.6                   | -21.6                    |
| 1.56                                                                     | 47.7                     | 182.5                     | -54.7                  | -120.7                     | -29.1                   | -22.2                    |
| 1.61(TS)                                                                 | 48.5                     | 190.6                     | -57.9                  | -123.7                     | -30.9                   | -22.9                    |
| 1.67                                                                     | 49.2                     | 199.8                     | -61.5                  | -127.2                     | -33.1                   | -23.6                    |
| 1.72                                                                     | 50.0                     | 210.4                     | -65.7                  | -131.2                     | -35.6                   | -24.4                    |
| 1.77                                                                     | 50.8                     | 222.4                     | -70.5                  | -135.7                     | -38.7                   | -25.3                    |
| 1.82                                                                     | 51.8                     | 235.9                     | -75.8                  | -140.7                     | -42.3                   | -26.3                    |
| 1.87                                                                     | 52.8                     | 251.0                     | -81.6                  | -146.2                     | -46.8                   | -27.4                    |
| 1.92                                                                     | 54.0                     | 267.6                     | -87.9                  | -152.1                     | -52.1                   | -28.5                    |

**Table S8. EDA energy terms of TS8 along IRC**

| Energy terms<br>(in kcal/mol)<br>$r(\text{C-H})$<br>in <b>TS8</b> (in Å) | $\Delta E_{\text{dist}}$ | $\Delta E_{\text{Pauli}}$ | $\Delta E_{\text{ct}}$ | $\Delta E_{\text{elstat}}$ | $\Delta E_{\text{pol}}$ | $\Delta E_{\text{disp}}$ |
|--------------------------------------------------------------------------|--------------------------|---------------------------|------------------------|----------------------------|-------------------------|--------------------------|
| 1.40                                                                     | 41.2                     | 137.1                     | -38.0                  | -100.3                     | -21.0                   | -18.9                    |
| 1.46                                                                     | 41.6                     | 139.1                     | -38.7                  | -100.9                     | -21.5                   | -19.1                    |
| 1.51                                                                     | 42.0                     | 141.9                     | -39.5                  | -101.9                     | -22.1                   | -19.4                    |
| 1.56                                                                     | 42.3                     | 145.3                     | -40.6                  | -103.2                     | -22.9                   | -19.8                    |
| 1.62                                                                     | 42.6                     | 149.5                     | -42.0                  | -104.8                     | -23.7                   | -20.2                    |
| 1.67(TS)                                                                 | 43.0                     | 154.6                     | -43.8                  | -106.9                     | -24.8                   | -20.7                    |
| 1.72                                                                     | 43.3                     | 160.5                     | -45.8                  | -109.3                     | -25.9                   | -21.3                    |
| 1.78                                                                     | 43.7                     | 167.5                     | -48.4                  | -112.1                     | -27.3                   | -21.9                    |
| 1.83                                                                     | 44.2                     | 175.6                     | -51.5                  | -115.5                     | -29.0                   | -22.5                    |
| 1.88                                                                     | 44.7                     | 184.9                     | -55.1                  | -119.3                     | -31.0                   | -23.3                    |
| 1.93                                                                     | 45.4                     | 195.5                     | -59.2                  | -123.7                     | -33.3                   | -24.1                    |

## Additional Discussions of Computational Results

### Effects of electronic properties of aromatic substituents on LLHT

For the para-OMe and para-CO<sub>2</sub>Me substituted styrene, we computed the Markovnikov and anti-Markovnikov LLHT transition states in the reactions with alcohol (**TS1a** vs **TS2a**; **TS1b** vs **TS2b**) and aldehyde (**TS3a** vs **TS4a**; **TS3b** vs **TS4b**). As shown in Fig. S6 and S7, the electronic properties of the para-substituents do not affect the regioselectivity, favoring the Markovnikov selectivity. The EDA results indicate that the charge transfer effect is also the dominant factor in controlling the regioselectivity. Compared with styrene, the para-OMe and para-CO<sub>2</sub>Me can indeed increase and reduce the LUMO orbital coefficients of the two carbon atoms, respectively. However, the differences in orbital coefficients between the two carbon atoms are slightly changed (24% vs 12% for styrene; 25% vs 14% for para-OMe styrene; 17% vs 6% for para-CO<sub>2</sub>Me styrene), which leads to comparable charge transfer effect ( $\Delta\Delta E_{ct} = 6\sim 8$  kcal/mol) in the reactions of alcohol and aldehyde with styrenes. Thus, the electronic properties of styrene para-substituents exert a small influence on both the trends of regioselectivity and the charge transfer effect.

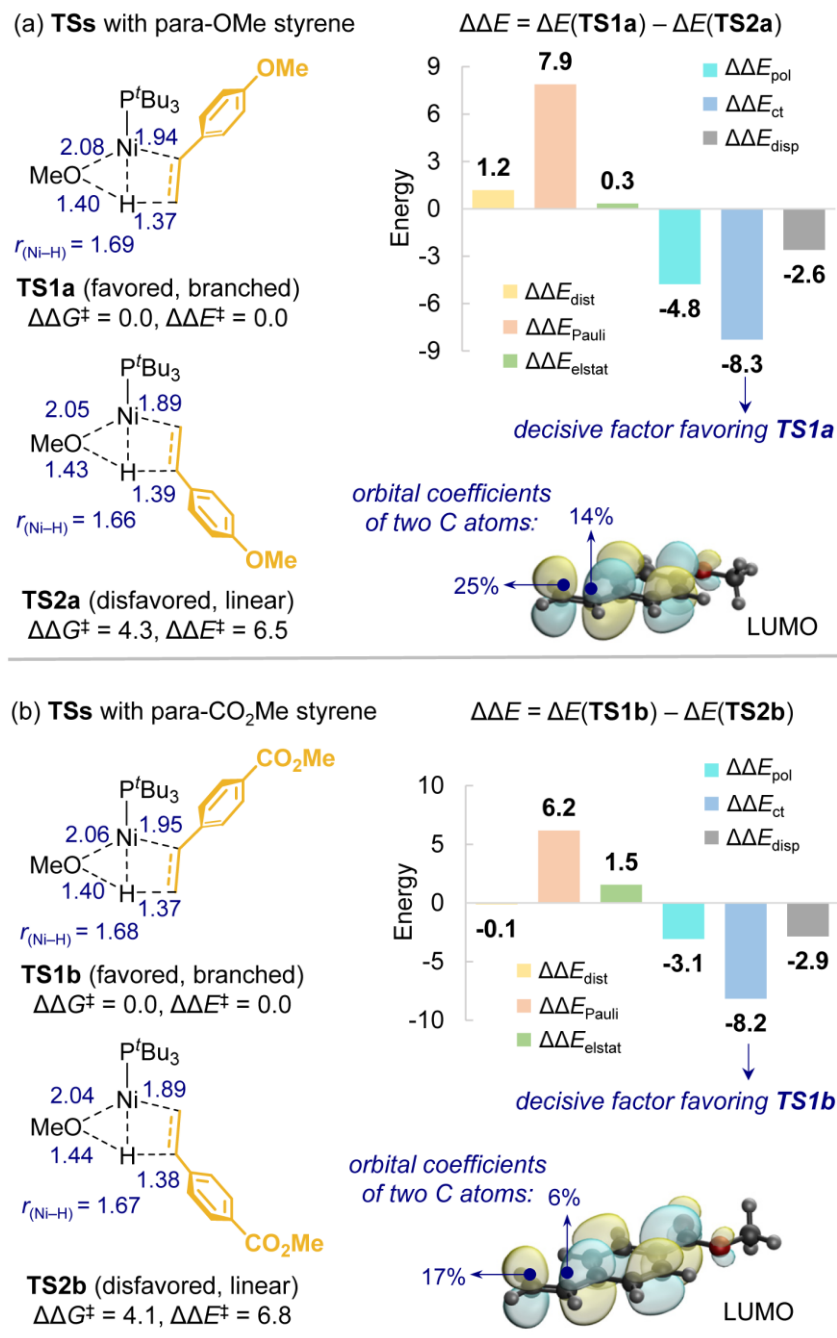

**Fig. S6.** EDA results for the two regioisomeric LLHT transition states with para-OMe and para-CO<sub>2</sub>Me substituted styrene. Energies are given in kcal/mol.

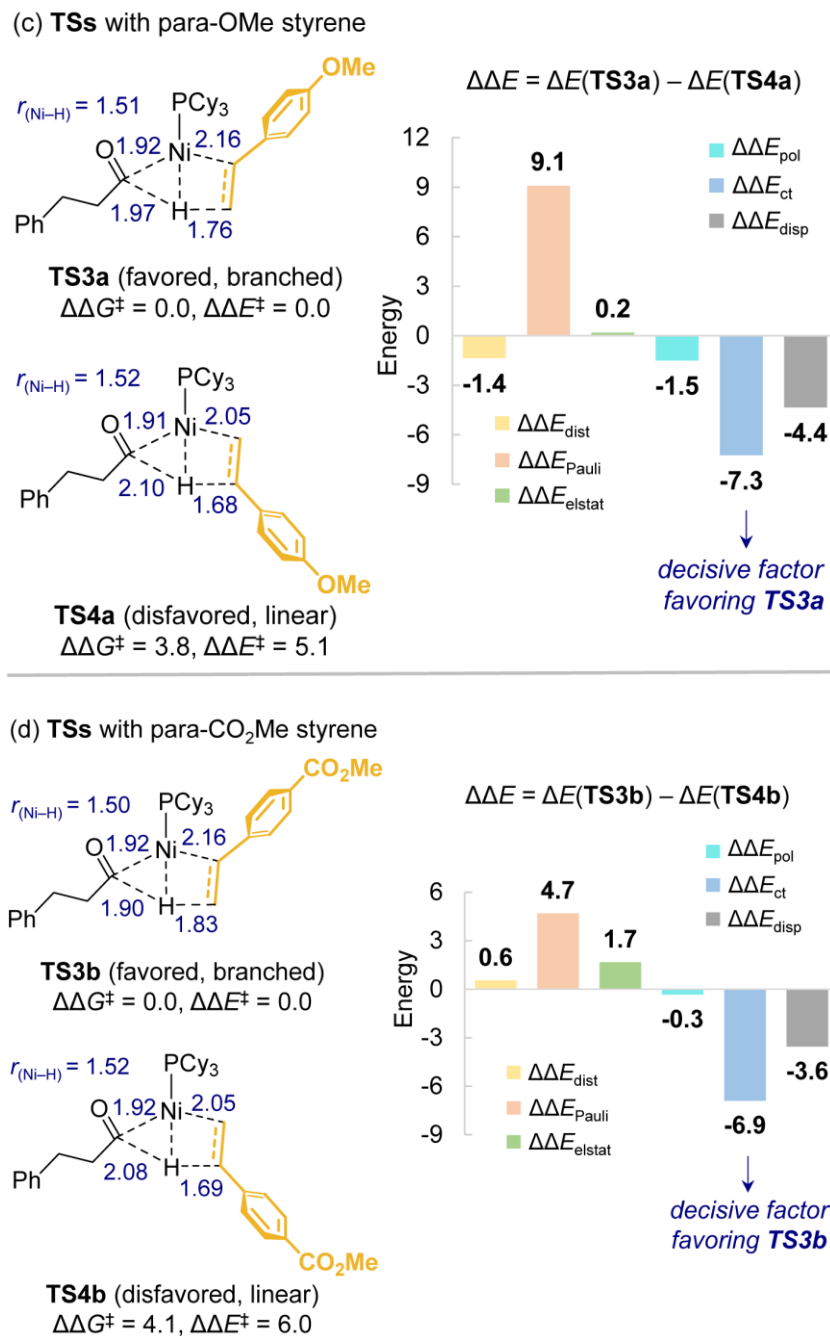

**Fig. S7.** EDA results for the two regioisomeric LLHT transition states with para-OMe and para-CO<sub>2</sub>Me substituted styrene. Energies are given in kcal/mol.

### Effects of ortho-substituents on LLHT

We computed the LLHT transition states with ortho-methyl substituted styrene and performed EDA calculations. As shown in Fig. S8, the results indicate that the Markovnikov selectivity in the reactions with alcohol and aldehyde is also favored over the anti-Markovnikov selectivity (**TS1c** vs **TS2c**; **TS3c** vs **TS4c**). While the charge transfer is still the dominant factor for controlling regioselectivity in P<sup>t</sup>Bu<sub>3</sub>-Ni mediated LLHT (**TS1c** vs **TS2c**), the dispersion effect becomes more important in PCy<sub>3</sub>-Ni mediated LLHT (**TS3c** vs **TS4c**) although the charge transfer is still a positive contributor. This is mostly

because the non-covalent interactions between ortho-Me substituted styrene and the PCy<sub>3</sub> ligand in **TS3c** are much greater, which is evidenced by the difference in NCI plots between **TS3c** and **TS4c**.

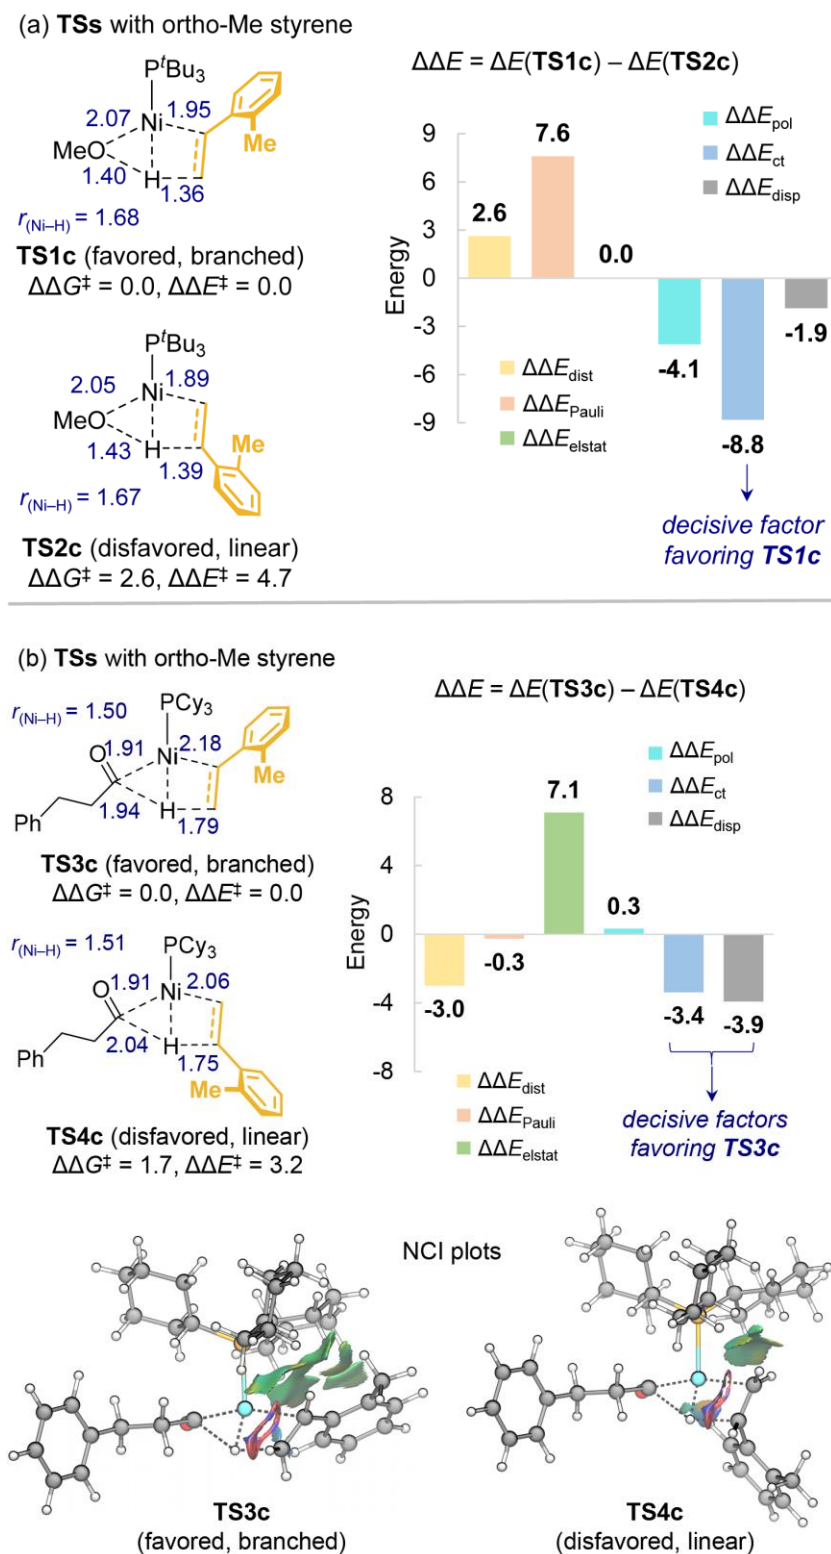

**Fig. S8.** EDA results for regioisomeric LLHT transition states with ortho-Me substituted styrene. Energies are given in kcal/mol.

## Effects of alkenes with larger alkyl groups on LLHT

Taking the reaction of pyridine with 1-hexene for example, we computed the LLHT transition states (**TS7a** and **TS8a**, Fig. S9) and performed EDA calculations. The results show that Pauli repulsion is also the dominant factor for the favored anti-Markovnikov selectivity, which indicates that methyl and larger alkyl groups share the same conclusion for regioselectivity.

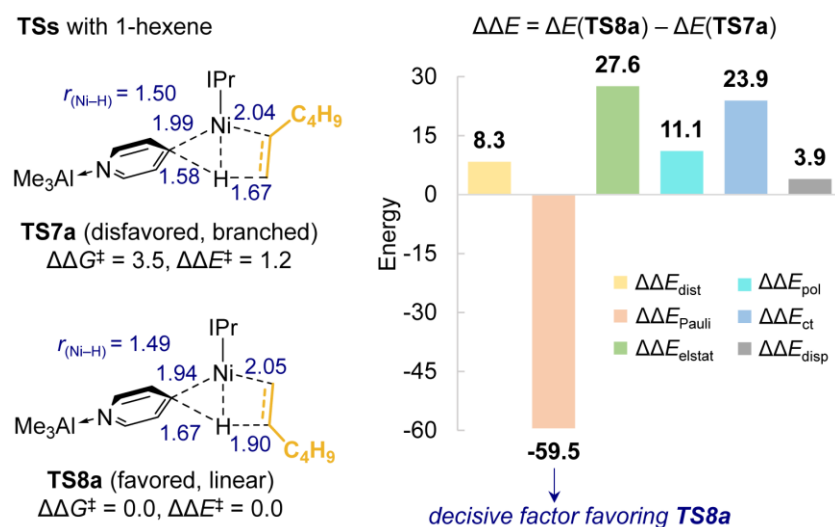

**Fig. S9.** EDA results for regioisomeric LLHT transition states with 1-hexene. Energies are given in kcal/mol.

## Effects of ligands on LLHT

The choice of ligands in experiments mostly depends on the reaction efficiency when employing different types of ligands. In this regard, for the hydroarylation of styrene with MeOH reported by Zhou group (*Angew. Chem. Int. Ed.* 2018, 57, 461), although the selectivity is unchanged, the yield is dramatically decreased when replacing  $P^t\text{Bu}_3$  with IPr (Fig. S10). For the hydroarylation of alkyl-substituted alkenes reported by Hiyama group (*J. Am. Chem. Soc.* 2010, 132, 13666), while IPr gives a good yield of linear product, the phosphine ligand (e.g.,  $P^i\text{Pr}_3$ ) is completely ineffective (Fig. S11). We further computed the barriers of LLHT and analyzed the key factor for regioselectivity. As shown in Fig. S10 and S11, both the regioselectivity of LLHT and the dominant factor, i.e., charge transfer for Markovnikov selectivity with styrene and Pauli repulsion for anti-Markovnikov selectivity with propene, are not affected by the change of ligands. However, for the reaction with styrene, the LLHT transition states with IPr ( $\Delta G^\ddagger = 32.9$  kcal/mol for **TS1d**;  $\Delta G^\ddagger = 36.1$  kcal/mol for **TS2d**) have higher barriers than those with  $P^t\text{Bu}_3$  ( $\Delta G^\ddagger = 26.8$  kcal/mol for **TS1**;  $\Delta G^\ddagger = 30.0$  kcal/mol for **TS2**, Fig. S1). For the reaction with propene, the LLHT transition states with  $P^t\text{Bu}_3$  ( $\Delta G^\ddagger = 35.2$  kcal/mol for **TS7b**;  $\Delta G^\ddagger = 30.1$  kcal/mol for **TS8b**) is less favorable than those with IPr ( $\Delta G^\ddagger = 27.2$  kcal/mol for **TS7**;  $\Delta G^\ddagger = 25.1$  kcal/mol for **TS8**, Fig. S1). These results indicate that the choice of ligands can affect the reactivity of LLHT. Moreover, it should be noted that ligands can exert influence on not only LLHT but also other reaction steps, such as transmetalation and reductive elimination. The uses of phosphine ligands for aryl-substituted alkenes and NHC ligands for alkyl-substituted alkenes are due to their capacity for promoting the overall reaction efficiency.

The electronic and steric effects of ligands on LLHT regioselectivity can be understood from two aspects: 1) The NHC-type ligands are typically bulkier than the phosphine ligands. Thus, the differences of geometry deformations between the two LLHT transition states with NHC-type ligands are expected to be greater than those with phosphine ligands. This is evidenced by the finding that the computed  $\Delta\Delta E_{\text{dist}}$  values of **TS5** vs **TS6** ( $\Delta\Delta E_{\text{dist}}(\text{TS6-TS5}) = -7.1$  kcal/mol) and **TS7** vs **TS8** ( $\Delta\Delta E_{\text{dist}}(\text{TS8-TS7}) = -6.3$  kcal/mol) are larger than those of **TS1** vs **TS2** ( $\Delta\Delta E_{\text{dist}}(\text{TS1-TS2}) = 0.6$  kcal/mol) and **TS3** vs **TS4** ( $\Delta\Delta E_{\text{dist}}(\text{TS3-TS4}) = -1.6$  kcal/mol). 2) The NHC-type ligands are better electron donors than phosphine ligands, which can render the Ni fragments ligated by NHC-type ligands more electron-rich. This can enhance both Pauli repulsion and charge transfer effects with the olefin fragments, which is supported by the much greater  $\Delta\Delta E_{\text{Pauli}}$  and  $\Delta\Delta E_{\text{ct}}$  values of **TS5** vs **TS6** ( $\Delta\Delta E_{\text{Pauli}}(\text{TS6-TS5}) = -23.9$  kcal/mol;  $\Delta\Delta E_{\text{ct}}(\text{TS6-TS5}) = 10.2$  kcal/mol) and **TS7** vs **TS8** ( $\Delta\Delta E_{\text{Pauli}}(\text{TS8-TS7}) = -47.1$  kcal/mol;  $\Delta\Delta E_{\text{ct}}(\text{TS8-TS7}) = 18.4$  kcal/mol) than those of **TS1** vs **TS2** ( $\Delta\Delta E_{\text{Pauli}}(\text{TS1-TS2}) = 5.4$  kcal/mol;  $\Delta\Delta E_{\text{ct}}(\text{TS1-TS2}) = -7.7$  kcal/mol) and **TS3** vs **TS4** ( $\Delta\Delta E_{\text{Pauli}}(\text{TS3-TS4}) = 4.9$  kcal/mol;  $\Delta\Delta E_{\text{ct}}(\text{TS3-TS4}) = -6.0$  kcal/mol), respectively.

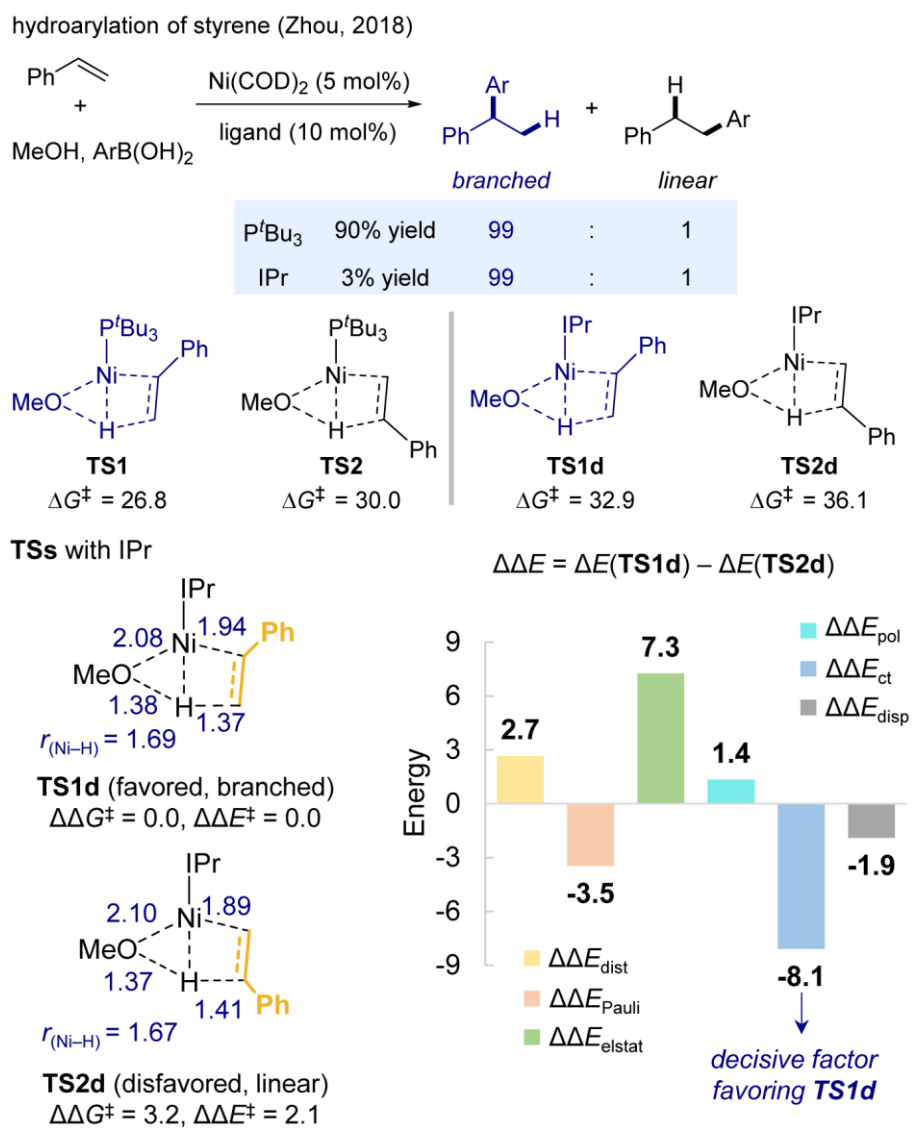

**Fig. S10.** EDA results for regioisomeric LLHT transition states with styrene and IPr. Energies are given in kcal/mol.



hydroarylation of alkyl-substituted alkenes (Hiyama, 2010)

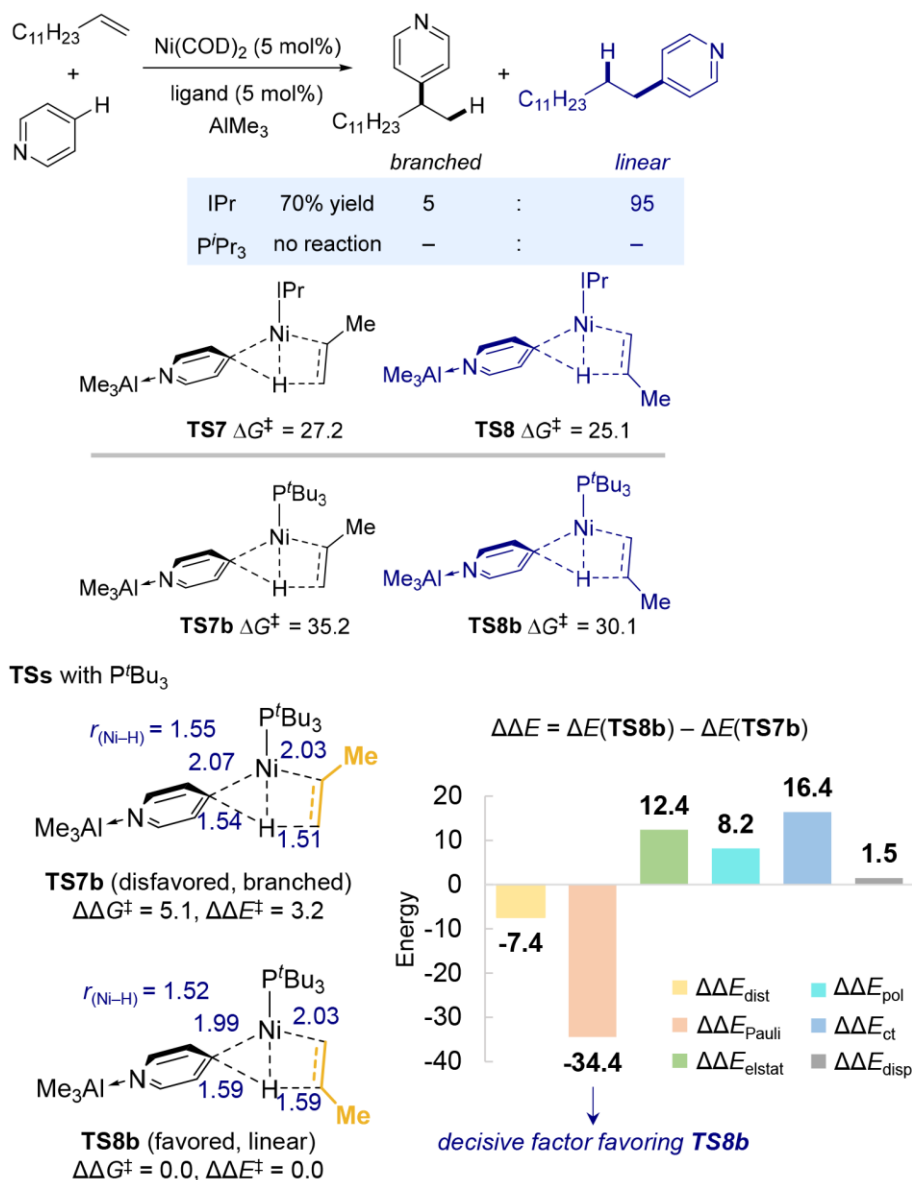

**Fig. S11.** EDA results for regioisomeric LLHT transition states with propene and  $\text{P}^i\text{Bu}_3$ . Energies are given in kcal/mol.

### Effects of alkene types on LLHT

We computed the Markovnikov and anti-Markovnikov LLHT transition states by exchanging the alkene type (Fig. S12). As discussed in the manuscript, the transition states of **TS1/TS2** and **TS3/TS4** with styrene favor the Markovnikov selectivity, and the transition states of **TS5/TS6** and **TS7/TS8** with propene favor the anti-Markovnikov selectivity. After exchanging the alkene type in these transition states, the regioselectivity, i.e., the barrier difference between the two LLHT transition states, is not consistent with the alkene type. Except for the Markovnikov selectivity, styrene can also afford the anti-Markovnikov selectivity in the presence of NHC-type ligands (**TS5c** vs **TS6c**; **TS7c** vs **TS8c**). The regioselectivity with propene and  $\text{P}^i\text{Bu}_3$  (**TS1e** vs **TS2e**) is significantly decreased and even reversed compared with other transition states with propene (**TS3e** vs **TS4e**; **TS5** vs **TS6**; **TS7** vs **TS8**). This indicates the regioselectivity is not merely determined by the alkene type.

As shown in Fig. 13, the EDA results of **TS1e/TS2e**, together with those of **TS1/TS2** and **TS3/TS4** (Fig. 1 and 2 in the manuscript), reveal that charge transfer is the dominant factor for favoring the Markovnikov selectivity. The EDA results of **TS3e/TS4e**, together with those of **TS5/TS6** and **TS7/TS8** (Fig. 3 and 4 in the manuscript), suggest that the anti-Markovnikov selectivity is controlled by Pauli repulsion. However, although the combination of styrene with NHC-type ligands can afford the anti-Markovnikov selectivity, the EDA results of **TS7c/TS8c** show that Pauli repulsion is a negative contributor for the regioselectivity. Thus, the steric and electronic properties of ligands can also affect the interactions with alkenes and alter the intermolecular forces (i.e., the six EDA energy terms), which is critical for the trend of stability of LLHT transition states. The EDA results of **TS5c/TS6c** are not currently available due to the failure of EDA calculations with 206 atoms.

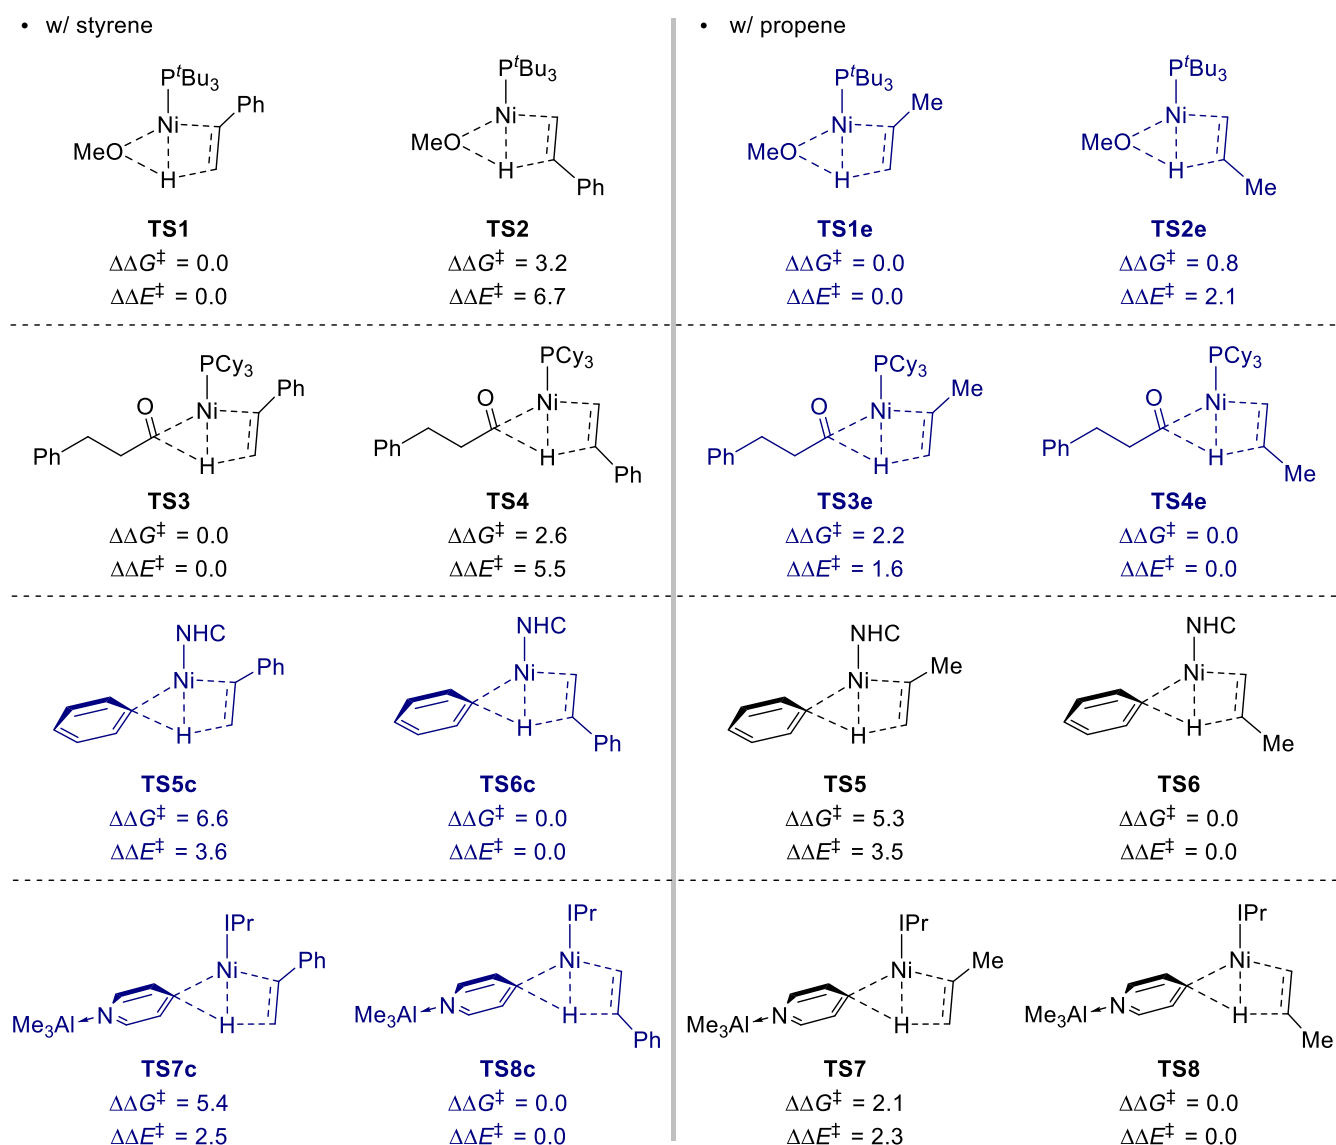

**Fig. S12.** Computed LLHT transition states with different alkenes. Energies are given in kcal/mol.

**TSs with propene**

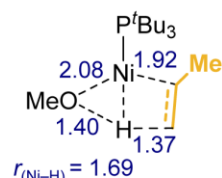

**TS1e** (favored, branched)  
 $\Delta\Delta G^\ddagger = 0.0$ ,  $\Delta\Delta E^\ddagger = 0.0$

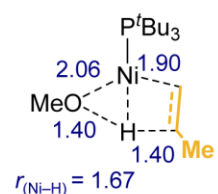

**TS2e** (disfavored, linear)  
 $\Delta\Delta G^\ddagger = 0.8$ ,  $\Delta\Delta E^\ddagger = 2.1$

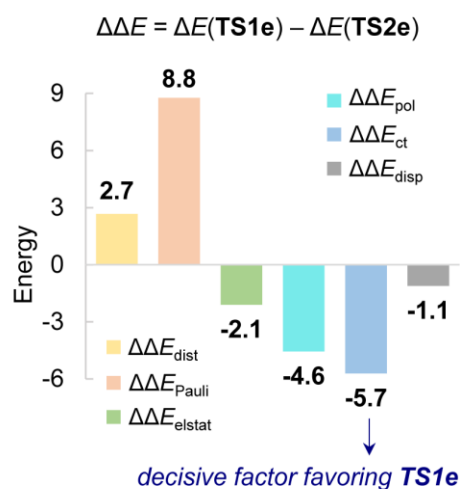

**TSs with propene**

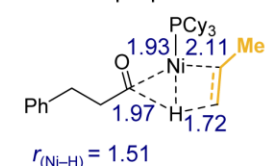

**TS3e** (disfavored, branched)  
 $\Delta\Delta G^\ddagger = 2.2$ ,  $\Delta\Delta E^\ddagger = 1.6$

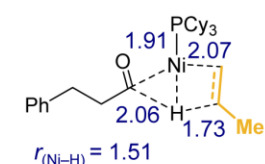

**TS4e** (favored, linear)  
 $\Delta\Delta G^\ddagger = 0.0$ ,  $\Delta\Delta E^\ddagger = 0.0$

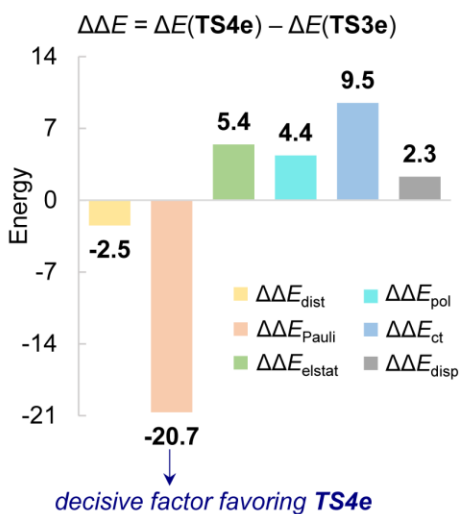

**TSs with styrene**

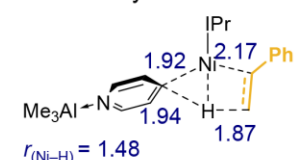

**TS7c** (disfavored, branched)  
 $\Delta\Delta G^\ddagger = 5.4$ ,  $\Delta\Delta E^\ddagger = 2.5$

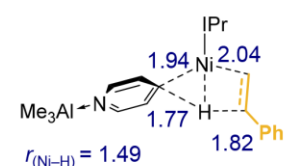

**TS8c** (favored, linear)  
 $\Delta\Delta G^\ddagger = 0.0$ ,  $\Delta\Delta E^\ddagger = 0.0$

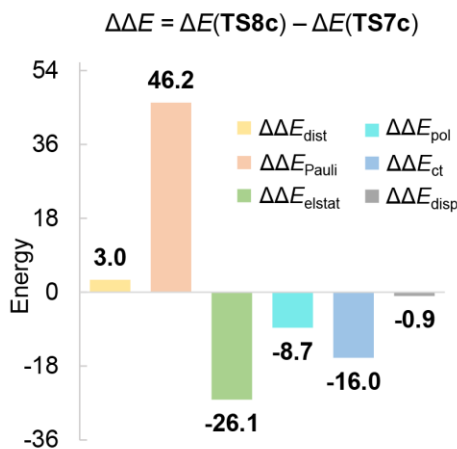

**Fig. S13.** EDA results for regioisomeric LLHT transition states with different alkenes. Energies are given in kcal/mol.

## Cartesian Coordinates (Å) and Energies of the Optimized Structures

TS1

|                                               |                             |         |         |
|-----------------------------------------------|-----------------------------|---------|---------|
| B3LYP SCF energy:                             | -1409.54474059 a.u.         |         |         |
| B3LYP enthalpy:                               | -1408.955466 a.u.           |         |         |
| B3LYP free energy:                            | -1409.044623 a.u.           |         |         |
| M06 SCF energy in solution:                   | -2748.21765063 a.u.         |         |         |
| M06 enthalpy in solution:                     | -2747.628376 a.u.           |         |         |
| M06 free energy in solution:                  | -2747.717533 a.u.           |         |         |
| Three lowest frequencies (cm <sup>-1</sup> ): | -1216.6892                  | 24.0232 | 39.0716 |
| Imaginary frequency:                          | -1216.6892 cm <sup>-1</sup> |         |         |

Cartesian coordinates

| ATOM | X         | Y         | Z         |
|------|-----------|-----------|-----------|
| Ni   | 0.223869  | 1.218438  | -0.626901 |
| P    | -1.205299 | -0.405921 | 0.025139  |
| C    | -1.324602 | -1.956886 | -1.145675 |
| C    | -1.994837 | -1.546587 | -2.476299 |
| C    | 0.101229  | -2.412426 | -1.529577 |
| C    | -2.084045 | -3.165437 | -0.560534 |
| H    | -3.063364 | -1.345371 | -2.378077 |
| H    | -1.512513 | -0.668486 | -2.918585 |
| H    | -1.886619 | -2.375636 | -3.187919 |
| H    | 0.704090  | -2.738190 | -0.683062 |
| H    | 0.018847  | -3.261175 | -2.222192 |
| H    | 0.640836  | -1.612551 | -2.037674 |
| H    | -2.157549 | -3.943216 | -1.332927 |
| H    | -1.561194 | -3.610452 | 0.289718  |
| H    | -3.100440 | -2.921699 | -0.245554 |
| C    | -0.735517 | -1.008431 | 1.812511  |
| C    | -1.872023 | -1.671971 | 2.615865  |
| C    | 0.450722  | -1.995171 | 1.739158  |
| C    | -0.211352 | 0.221640  | 2.592995  |
| H    | -2.696164 | -0.986062 | 2.825323  |
| H    | -2.281674 | -2.553144 | 2.115966  |
| H    | -1.473212 | -2.002281 | 3.584739  |
| H    | 1.280210  | -1.598564 | 1.147041  |
| H    | 0.824303  | -2.160548 | 2.758311  |
| H    | 0.167306  | -2.972706 | 1.341773  |
| H    | 0.105683  | -0.107047 | 3.592037  |
| H    | 0.658146  | 0.663381  | 2.095870  |
| H    | -0.958317 | 1.004102  | 2.725493  |
| C    | -2.962094 | 0.437937  | 0.080141  |
| C    | -3.109781 | 1.315295  | -1.189417 |
| C    | -4.164382 | -0.522344 | 0.182898  |
| C    | -3.024056 | 1.427361  | 1.264962  |
| H    | -2.348691 | 2.100482  | -1.207915 |
| H    | -3.064857 | 0.749932  | -2.120485 |
| H    | -4.093418 | 1.804078  | -1.153871 |
| H    | -4.112341 | -1.179728 | 1.055230  |
| H    | -5.080223 | 0.076198  | 0.280570  |
| H    | -4.285894 | -1.144689 | -0.707185 |
| H    | -3.958649 | 1.998069  | 1.181595  |
| H    | -3.037012 | 0.935467  | 2.240096  |
| H    | -2.200644 | 2.143075  | 1.222511  |
| O    | -0.474971 | 3.129400  | -0.235987 |

|   |           |           |           |
|---|-----------|-----------|-----------|
| C | 1.875838  | 0.723132  | -1.525954 |
| C | 1.724450  | 2.200391  | -1.593286 |
| H | 2.516729  | 2.768850  | -1.097047 |
| H | 1.540155  | 2.573418  | -2.604703 |
| C | -0.032749 | 3.819589  | 0.906943  |
| H | 1.056605  | 3.720898  | 1.075142  |
| H | -0.249678 | 4.895423  | 0.812766  |
| H | -0.529060 | 3.462821  | 1.825687  |
| H | 0.663033  | 2.806649  | -0.982030 |
| C | 2.907616  | 0.095482  | -0.670664 |
| C | 3.484864  | -1.135341 | -1.040433 |
| C | 3.351508  | 0.683407  | 0.532740  |
| C | 4.448845  | -1.755159 | -0.245627 |
| H | 3.177924  | -1.603055 | -1.972914 |
| C | 4.317869  | 0.067221  | 1.325274  |
| H | 2.929029  | 1.633223  | 0.849996  |
| C | 4.871524  | -1.158403 | 0.943937  |
| H | 4.877745  | -2.702804 | -0.562255 |
| H | 4.640422  | 0.546271  | 2.246514  |
| H | 5.625124  | -1.637669 | 1.562830  |
| H | 1.722056  | 0.200290  | -2.470528 |

TS2

|                                  |                     |         |         |
|----------------------------------|---------------------|---------|---------|
| B3LYP SCF energy:                | -1409.53663466 a.u. |         |         |
| B3LYP enthalpy:                  | -1408.948032 a.u.   |         |         |
| B3LYP free energy:               | -1409.039231 a.u.   |         |         |
| M06 SCF energy in solution:      | -2748.20989685 a.u. |         |         |
| M06 enthalpy in solution:        | -2747.621294 a.u.   |         |         |
| M06 free energy in solution:     | -2747.712493 a.u.   |         |         |
| Three lowest frequencies (cm-1): | -1236.1913          | 19.0904 | 23.1746 |
| Imaginary frequency:             | -1236.1913 cm-1     |         |         |

Cartesian coordinates

| ATOM | X         | Y         | Z         |
|------|-----------|-----------|-----------|
| Ni   | -0.447612 | 0.552410  | -0.458959 |
| P    | 1.621672  | -0.174959 | -0.011123 |
| C    | 2.678652  | 1.403829  | 0.400350  |
| C    | 2.412450  | 2.451959  | -0.708867 |
| C    | 2.138588  | 2.024989  | 1.709299  |
| C    | 4.200099  | 1.197424  | 0.537115  |
| H    | 2.822205  | 2.171448  | -1.679476 |
| H    | 1.341792  | 2.639469  | -0.830137 |
| H    | 2.886837  | 3.398021  | -0.415609 |
| H    | 2.413860  | 1.445770  | 2.593957  |
| H    | 2.586888  | 3.020397  | 1.828779  |
| H    | 1.050558  | 2.141351  | 1.682904  |
| H    | 4.658745  | 2.151655  | 0.830239  |
| H    | 4.461018  | 0.463031  | 1.303718  |
| H    | 4.670493  | 0.892783  | -0.401718 |
| C    | 1.471108  | -1.273169 | 1.587088  |
| C    | 2.764497  | -1.433435 | 2.412584  |
| C    | 0.370577  | -0.662291 | 2.489974  |
| C    | 0.964094  | -2.681797 | 1.204368  |
| H    | 3.583537  | -1.872851 | 1.837792  |

|   |           |           |           |
|---|-----------|-----------|-----------|
| H | 3.112221  | -0.487300 | 2.833793  |
| H | 2.562105  | -2.105002 | 3.258182  |
| H | -0.586647 | -0.583006 | 1.965555  |
| H | 0.229235  | -1.323956 | 3.355404  |
| H | 0.614251  | 0.329228  | 2.868138  |
| H | 0.710595  | -3.218952 | 2.127568  |
| H | 0.058852  | -2.637139 | 0.590720  |
| H | 1.712869  | -3.280331 | 0.680927  |
| C | 2.548187  | -1.194636 | -1.383183 |
| C | 2.967809  | -0.248228 | -2.530640 |
| C | 3.799871  | -1.954895 | -0.895413 |
| C | 1.571632  | -2.210430 | -2.021360 |
| H | 2.129827  | 0.358762  | -2.888394 |
| H | 3.790485  | 0.416073  | -2.257895 |
| H | 3.315176  | -0.859428 | -3.373904 |
| H | 3.552236  | -2.757913 | -0.196684 |
| H | 4.288238  | -2.422786 | -1.761020 |
| H | 4.535780  | -1.303994 | -0.418191 |
| H | 2.105418  | -2.749025 | -2.816050 |
| H | 1.194986  | -2.956498 | -1.321934 |
| H | 0.715850  | -1.705769 | -2.471020 |
| C | -1.347757 | -0.390580 | -1.832673 |
| C | -2.359723 | 0.537810  | -1.260125 |
| H | -0.970799 | -0.139517 | -2.826764 |
| H | -2.636155 | 1.347621  | -1.944166 |
| H | -1.529561 | -1.458766 | -1.709435 |
| C | -3.559632 | -0.041694 | -0.558983 |
| C | -4.832723 | 0.504432  | -0.776514 |
| C | -3.448802 | -1.123943 | 0.328567  |
| C | -5.960529 | -0.019772 | -0.142635 |
| H | -4.941368 | 1.346522  | -1.456854 |
| C | -4.573737 | -1.652417 | 0.960357  |
| H | -2.469876 | -1.552773 | 0.526972  |
| C | -5.837070 | -1.103364 | 0.727936  |
| H | -6.936741 | 0.419543  | -0.332276 |
| H | -4.462297 | -2.492131 | 1.642044  |
| H | -6.713251 | -1.513286 | 1.223099  |
| O | -1.142033 | 2.027143  | 0.773696  |
| H | -1.891975 | 1.346995  | -0.234637 |
| C | -1.156013 | 3.388294  | 0.423793  |
| H | -1.871380 | 3.938282  | 1.055823  |
| H | -0.168553 | 3.861392  | 0.561169  |
| H | -1.450613 | 3.563311  | -0.628709 |

TS3

|                                  |                     |         |         |
|----------------------------------|---------------------|---------|---------|
| B3LYP SCF energy:                | -1950.30595981 a.u. |         |         |
| B3LYP enthalpy:                  | -1949.478710 a.u.   |         |         |
| B3LYP free energy:               | -1949.593995 a.u.   |         |         |
| M06 SCF energy in solution:      | -3288.75321478 a.u. |         |         |
| M06 enthalpy in solution:        | -3287.925965 a.u.   |         |         |
| M06 free energy in solution:     | -3288.041250 a.u.   |         |         |
| Three lowest frequencies (cm-1): | -454.7459           | 11.3874 | 15.2528 |
| Imaginary frequency:             | -454.7459 cm-1      |         |         |

Cartesian coordinates

| ATOM | X         | Y         | Z         |
|------|-----------|-----------|-----------|
| Ni   | -0.181047 | 0.333896  | -1.683366 |
| C    | 1.474432  | -0.625271 | -1.775367 |
| O    | 1.575764  | -1.721552 | -2.302363 |
| C    | -1.741106 | 2.913557  | -1.203770 |
| C    | -0.590635 | 3.705031  | -1.007101 |
| C    | -0.620775 | 4.827361  | -0.181021 |
| C    | -1.797385 | 5.191840  | 0.480188  |
| C    | -2.944660 | 4.414188  | 0.304741  |
| C    | -2.915115 | 3.292332  | -0.523053 |
| H    | 0.336531  | 3.434870  | -1.504902 |
| H    | 0.281094  | 5.420663  | -0.052273 |
| H    | -1.819586 | 6.069583  | 1.120106  |
| H    | -3.869829 | 4.686779  | 0.806621  |
| H    | -3.821502 | 2.708480  | -0.665699 |
| C    | 2.708339  | 0.035496  | -1.134581 |
| H    | 2.919383  | 0.939542  | -1.723933 |
| H    | 2.441434  | 0.399616  | -0.133311 |
| C    | 3.953247  | -0.871311 | -1.077025 |
| H    | 3.732466  | -1.743575 | -0.449821 |
| H    | 4.143502  | -1.261064 | -2.082744 |
| C    | 5.170950  | -0.146476 | -0.549612 |
| C    | 6.013957  | 0.565281  | -1.416057 |
| C    | 5.473501  | -0.139290 | 0.819616  |
| C    | 7.119475  | 1.265502  | -0.931447 |
| H    | 5.802029  | 0.563760  | -2.483497 |
| C    | 6.578051  | 0.559077  | 1.310384  |
| H    | 4.837990  | -0.693827 | 1.507569  |
| C    | 7.405665  | 1.265764  | 0.435576  |
| H    | 7.761380  | 1.806192  | -1.622571 |
| H    | 6.795436  | 0.546594  | 2.375599  |
| H    | 8.268443  | 1.807259  | 0.814501  |
| C    | -0.876249 | 1.623751  | -3.198498 |
| H    | -1.148027 | 0.965432  | -4.020097 |
| H    | -0.240381 | 2.456898  | -3.485871 |
| H    | 0.653310  | 0.760231  | -2.861970 |
| P    | -1.054748 | -0.732428 | 0.142163  |
| C    | -1.252313 | 0.473425  | 1.585055  |
| C    | -1.979436 | 0.033224  | 2.877354  |
| C    | 0.104279  | 1.127629  | 1.938077  |
| H    | -1.863610 | 1.260647  | 1.121368  |
| C    | -2.198160 | 1.241648  | 3.805632  |
| H    | -1.385106 | -0.707412 | 3.418526  |
| H    | -2.937183 | -0.448507 | 2.658184  |
| C    | -0.074056 | 2.302084  | 2.917827  |
| H    | 0.772386  | 0.376272  | 2.383835  |
| H    | 0.592625  | 1.485920  | 1.024788  |
| C    | -0.861054 | 1.900354  | 4.173850  |
| H    | -2.727931 | 0.920499  | 4.711964  |
| H    | -2.844535 | 1.977602  | 3.305533  |
| H    | 0.910854  | 2.698776  | 3.196691  |
| H    | -0.603239 | 3.113306  | 2.400450  |
| H    | -1.029719 | 2.778520  | 4.810194  |
| H    | -0.265323 | 1.192835  | 4.770092  |
| C    | 0.030777  | -2.186519 | 0.724902  |

|   |           |           |           |
|---|-----------|-----------|-----------|
| C | -0.094979 | -2.659546 | 2.188285  |
| C | -0.083712 | -3.400126 | -0.228174 |
| H | 1.043967  | -1.778847 | 0.604199  |
| C | 0.926131  | -3.766651 | 2.518139  |
| H | -1.112463 | -3.030252 | 2.379529  |
| H | 0.076003  | -1.828335 | 2.876240  |
| C | 0.959993  | -4.479669 | 0.100461  |
| H | -1.084380 | -3.842587 | -0.125868 |
| H | 0.043128  | -3.082247 | -1.265284 |
| C | 0.840266  | -4.954765 | 1.553079  |
| H | 0.780238  | -4.097860 | 3.554622  |
| H | 1.938057  | -3.337743 | 2.468523  |
| H | 0.840655  | -5.323265 | -0.591171 |
| H | 1.964285  | -4.070772 | -0.079214 |
| H | 1.620723  | -5.690288 | 1.786591  |
| H | -0.124001 | -5.467210 | 1.689781  |
| C | -2.771523 | -1.492073 | -0.153256 |
| C | -3.958347 | -0.520717 | 0.047924  |
| C | -2.873304 | -2.089018 | -1.579998 |
| H | -2.879291 | -2.309132 | 0.576279  |
| C | -5.306489 | -1.237426 | -0.150498 |
| H | -3.881625 | 0.297924  | -0.677390 |
| H | -3.941450 | -0.057464 | 1.036529  |
| C | -4.213922 | -2.810426 | -1.800943 |
| H | -2.774568 | -1.269744 | -2.305692 |
| H | -2.050294 | -2.775267 | -1.786686 |
| C | -5.409571 | -1.886192 | -1.536964 |
| H | -6.126651 | -0.523472 | 0.000066  |
| H | -5.420072 | -2.010258 | 0.624262  |
| H | -4.253987 | -3.204265 | -2.824506 |
| H | -4.269982 | -3.681286 | -1.130677 |
| H | -6.352224 | -2.440187 | -1.630910 |
| H | -5.432580 | -1.097160 | -2.303404 |
| C | -1.752035 | 1.749622  | -2.108756 |
| H | -2.677377 | 1.183439  | -2.144235 |

TS4

|                                               |                            |         |         |
|-----------------------------------------------|----------------------------|---------|---------|
| B3LYP SCF energy:                             | -1950.30183700 a.u.        |         |         |
| B3LYP enthalpy:                               | -1949.475157 a.u.          |         |         |
| B3LYP free energy:                            | -1949.593396 a.u.          |         |         |
| M06 SCF energy in solution:                   | -3288.74559085 a.u.        |         |         |
| M06 enthalpy in solution:                     | -3287.918911 a.u.          |         |         |
| M06 free energy in solution:                  | -3288.037150 a.u.          |         |         |
| Three lowest frequencies (cm <sup>-1</sup> ): | -568.1646                  | 10.0913 | 12.0135 |
| Imaginary frequency:                          | -568.1646 cm <sup>-1</sup> |         |         |

Cartesian coordinates

| ATOM | X         | Y        | Z         |
|------|-----------|----------|-----------|
| Ni   | -0.500154 | 1.023365 | 0.421295  |
| C    | 1.049594  | 1.222170 | -0.687099 |
| O    | 0.906388  | 1.441836 | -1.882704 |
| C    | 2.466786  | 1.130983 | -0.098427 |
| H    | 2.588005  | 2.020692 | 0.537760  |
| H    | 2.515649  | 0.277323 | 0.591619  |



|   |           |           |           |
|---|-----------|-----------|-----------|
| C | 3.591290  | 1.063161  | -1.149354 |
| H | 3.466053  | 0.152369  | -1.748176 |
| H | 3.464597  | 1.901348  | -1.842700 |
| C | 4.970261  | 1.088871  | -0.530173 |
| C | 5.611039  | 2.305623  | -0.252150 |
| C | 5.634306  | -0.098746 | -0.190941 |
| C | 6.870132  | 2.335988  | 0.348690  |
| H | 5.117061  | 3.238534  | -0.516574 |
| C | 6.894150  | -0.074985 | 0.409864  |
| H | 5.159037  | -1.053676 | -0.407909 |
| C | 7.517380  | 1.144262  | 0.682900  |
| H | 7.349121  | 3.291034  | 0.550086  |
| H | 7.391592  | -1.009085 | 0.659331  |
| H | 8.500036  | 1.165842  | 1.146758  |
| C | -1.391915 | 2.611845  | 1.569216  |
| H | 0.048445  | 2.410320  | 0.697142  |
| P | -0.903137 | -1.170619 | 0.042421  |
| C | -0.736617 | -2.051038 | 1.709232  |
| C | -1.061116 | -3.556646 | 1.846026  |
| C | 0.629677  | -1.746500 | 2.365106  |
| H | -1.491166 | -1.509367 | 2.298304  |
| C | -1.086210 | -3.964700 | 3.330725  |
| H | -0.299799 | -4.157578 | 1.341561  |
| H | -2.014003 | -3.809776 | 1.370280  |
| C | 0.650077  | -2.185892 | 3.840379  |
| H | 1.427171  | -2.270423 | 1.818082  |
| H | 0.848952  | -0.674598 | 2.291722  |
| C | 0.256791  | -3.660667 | 4.010978  |
| H | -1.323314 | -5.032888 | 3.417343  |
| H | -1.891681 | -3.422001 | 3.847585  |
| H | 1.644563  | -2.004106 | 4.267326  |
| H | -0.052386 | -1.556647 | 4.406823  |
| H | 0.213286  | -3.920369 | 5.076302  |
| H | 1.035676  | -4.297718 | 3.566082  |
| C | 0.301706  | -1.969834 | -1.193650 |
| C | 0.520787  | -3.495915 | -1.128898 |
| C | -0.018729 | -1.547108 | -2.647930 |
| H | 1.253708  | -1.492264 | -0.922689 |
| C | 1.596102  | -3.960708 | -2.130995 |
| H | -0.423801 | -4.020935 | -1.332768 |
| H | 0.841695  | -3.794514 | -0.128387 |
| C | 1.080445  | -1.996029 | -3.624548 |
| H | -0.963555 | -2.015373 | -2.956967 |
| H | -0.141659 | -0.463051 | -2.710454 |
| C | 1.297796  | -3.512795 | -3.566233 |
| H | 1.693407  | -5.052971 | -2.078510 |
| H | 2.567330  | -3.547185 | -1.820861 |
| H | 0.812401  | -1.684437 | -4.641979 |
| H | 2.016578  | -1.475345 | -3.377526 |
| H | 2.114225  | -3.813726 | -4.235100 |
| H | 0.392454  | -4.023804 | -3.927000 |
| C | -2.639453 | -1.609489 | -0.585043 |
| C | -3.717354 | -1.700090 | 0.521804  |
| C | -3.114694 | -0.586567 | -1.647514 |
| H | -2.561030 | -2.598532 | -1.061662 |
| C | -5.087104 | -2.095767 | -0.060673 |

|   |           |           |           |
|---|-----------|-----------|-----------|
| H | -3.808298 | -0.726858 | 1.018741  |
| H | -3.440711 | -2.419767 | 1.296202  |
| C | -4.480475 | -0.971900 | -2.241084 |
| H | -3.190511 | 0.398035  | -1.166956 |
| H | -2.384999 | -0.475823 | -2.452009 |
| C | -5.549737 | -1.121625 | -1.151958 |
| H | -5.827245 | -2.143776 | 0.748506  |
| H | -5.019311 | -3.110026 | -0.481735 |
| H | -4.786558 | -0.217105 | -2.976586 |
| H | -4.382317 | -1.920180 | -2.790520 |
| H | -6.498549 | -1.459648 | -1.587693 |
| H | -5.745289 | -0.138241 | -0.699631 |
| C | -2.116135 | 1.396916  | 1.624637  |
| H | -3.054950 | 1.325883  | 1.083663  |
| H | -2.042820 | 0.787090  | 2.522188  |
| H | -0.792213 | 2.865980  | 2.442017  |
| C | -1.896529 | 3.801953  | 0.819758  |
| C | -1.895658 | 5.057170  | 1.444190  |
| C | -2.407130 | 3.702177  | -0.483624 |
| C | -2.410946 | 6.180022  | 0.794306  |
| H | -1.496259 | 5.153329  | 2.451540  |
| C | -2.920519 | 4.822692  | -1.134195 |
| H | -2.374741 | 2.744610  | -0.996263 |
| C | -2.928008 | 6.066332  | -0.496840 |
| H | -2.404674 | 7.143540  | 1.297322  |
| H | -3.304323 | 4.727146  | -2.146578 |
| H | -3.324533 | 6.940099  | -1.006889 |

TS5

|                                               |                |                  |         |
|-----------------------------------------------|----------------|------------------|---------|
| B3LYP SCF energy:                             | -4071.43461044 | a.u.             |         |
| B3LYP enthalpy:                               | -4069.647606   | a.u.             |         |
| B3LYP free energy:                            | -4069.905824   | a.u.             |         |
| M06 SCF energy in solution:                   | -5408.95911442 | a.u.             |         |
| M06 enthalpy in solution:                     | -5407.172110   | a.u.             |         |
| M06 free energy in solution:                  | -5407.430328   | a.u.             |         |
| Three lowest frequencies (cm <sup>-1</sup> ): | -1110.7791     | 11.2443          | 12.0153 |
| Imaginary frequency:                          | -1110.7791     | cm <sup>-1</sup> |         |

Cartesian coordinates

| ATOM | X         | Y         | Z         |
|------|-----------|-----------|-----------|
| Ni   | 0.135580  | 0.031887  | -2.444769 |
| N    | 0.417275  | 0.894114  | 0.387831  |
| N    | -0.708586 | -0.948263 | 0.229537  |
| C    | -0.047634 | -0.011426 | -0.547076 |
| C    | 0.040484  | 0.533708  | 1.681923  |
| H    | 0.301338  | 1.131579  | 2.537408  |
| C    | -0.632530 | -0.629587 | 1.586445  |
| H    | -1.067379 | -1.258998 | 2.342790  |
| C    | -1.684745 | -0.171650 | -3.242183 |
| H    | -2.059709 | -1.163118 | -2.983936 |
| C    | -0.724183 | -0.120781 | -4.315604 |
| H    | -0.483961 | -1.042421 | -4.849221 |
| H    | 0.717813  | 0.131494  | -3.868046 |
| C    | 2.084086  | 0.270638  | -3.085130 |

|   |           |           |           |
|---|-----------|-----------|-----------|
| C | 2.914299  | -0.809204 | -3.454929 |
| C | 2.681028  | 1.549064  | -3.111864 |
| C | 4.252247  | -0.629631 | -3.820791 |
| H | 2.506866  | -1.816874 | -3.481275 |
| C | 4.019634  | 1.738884  | -3.465428 |
| H | 2.095467  | 2.425104  | -2.846188 |
| C | 4.812822  | 0.649308  | -3.830023 |
| H | 5.848558  | 0.796567  | -4.127173 |
| C | -1.449380 | -2.111222 | -0.208836 |
| C | -2.849630 | -2.153939 | -0.021259 |
| C | -0.764304 | -3.243155 | -0.717084 |
| C | -3.550958 | -3.315121 | -0.381296 |
| C | -1.500083 | -4.372953 | -1.068577 |
| C | -2.887057 | -4.419208 | -0.909842 |
| H | -4.625683 | -3.325219 | -0.255640 |
| H | -1.001156 | -5.246571 | -1.471024 |
| C | 1.262322  | 2.044799  | 0.151670  |
| C | 2.611367  | 2.015393  | 0.595020  |
| C | 0.729765  | 3.210447  | -0.431225 |
| C | 3.410564  | 3.134399  | 0.377085  |
| C | 1.563376  | 4.322128  | -0.619569 |
| C | 2.901667  | 4.284128  | -0.232392 |
| H | 4.452645  | 3.127545  | 0.674627  |
| H | 1.145315  | 5.207295  | -1.080013 |
| C | -0.751850 | 3.329115  | -0.814695 |
| H | -1.061664 | 2.345260  | -1.180461 |
| C | 3.200317  | 0.828347  | 1.372711  |
| H | 2.707096  | -0.077303 | 1.004178  |
| C | 0.764543  | -3.307274 | -0.818955 |
| H | 1.118467  | -2.302210 | -1.074799 |
| C | -3.651105 | -1.009577 | 0.620145  |
| H | -3.114018 | -0.077620 | 0.405226  |
| H | 4.442801  | 2.741634  | -3.461211 |
| H | 4.853029  | -1.489516 | -4.111859 |
| O | 3.782354  | 5.312856  | -0.390043 |
| O | -3.492295 | -5.580576 | -1.288373 |
| C | 3.328463  | 6.493930  | -1.033006 |
| H | 4.191884  | 7.160520  | -1.076527 |
| H | 2.974612  | 6.288340  | -2.051474 |
| H | 2.523684  | 6.980306  | -0.465678 |
| C | -4.903226 | -5.673160 | -1.168262 |
| H | -5.410864 | -4.908733 | -1.770699 |
| H | -5.170213 | -6.664028 | -1.540305 |
| H | -5.227314 | -5.579207 | -0.123074 |
| C | 1.422588  | -3.686481 | 0.514210  |
| C | 2.775884  | -3.367567 | 0.713470  |
| C | 0.750524  | -4.395980 | 1.512442  |
| C | 3.458656  | -3.764793 | 1.867000  |
| H | 3.311260  | -2.822420 | -0.061112 |
| C | 1.400544  | -4.790802 | 2.691895  |
| H | -0.295822 | -4.653720 | 1.376908  |
| C | 2.751410  | -4.474366 | 2.850544  |
| H | 3.271161  | -4.790079 | 3.753820  |
| C | 1.209923  | -4.221577 | -1.974816 |
| C | 1.880759  | -5.430128 | -1.774922 |
| C | 0.903843  | -3.835432 | -3.288699 |

|   |           |           |           |
|---|-----------|-----------|-----------|
| C | 2.255142  | -6.243151 | -2.856550 |
| H | 2.120173  | -5.752242 | -0.766143 |
| C | 1.266292  | -4.619432 | -4.386458 |
| H | 0.365571  | -2.903985 | -3.449761 |
| C | 1.942220  | -5.825027 | -4.151491 |
| H | 2.227284  | -6.448427 | -4.997124 |
| C | -5.060713 | -0.848308 | 0.005970  |
| C | -6.201555 | -0.674770 | 0.796291  |
| C | -5.214739 | -0.831916 | -1.390157 |
| C | -7.469436 | -0.482861 | 0.223581  |
| H | -6.115143 | -0.690485 | 1.877562  |
| C | -6.460695 | -0.635298 | -1.990044 |
| H | -4.346606 | -0.987786 | -2.022032 |
| C | -7.582358 | -0.461950 | -1.166992 |
| H | -8.560085 | -0.312680 | -1.622223 |
| C | -3.704856 | -1.130198 | 2.152284  |
| C | -3.820135 | -2.360405 | 2.803515  |
| C | -3.668113 | 0.038671  | 2.929590  |
| C | -3.893852 | -2.441671 | 4.203573  |
| H | -3.840928 | -3.277741 | 2.221881  |
| C | -3.745266 | -0.008127 | 4.323399  |
| H | -3.564597 | 1.001615  | 2.435261  |
| C | -3.856735 | -1.260530 | 4.946258  |
| H | -3.909342 | -1.312400 | 6.032641  |
| C | -0.961457 | 4.305243  | -1.985032 |
| C | -1.531969 | 5.570708  | -1.823230 |
| C | -0.525115 | 3.927418  | -3.264305 |
| C | -1.673097 | 6.450944  | -2.907564 |
| H | -1.873985 | 5.884707  | -0.841385 |
| C | -0.649938 | 4.780773  | -4.363453 |
| H | -0.067501 | 2.950275  | -3.398628 |
| C | -1.224650 | 6.044337  | -4.166336 |
| H | -1.322703 | 6.722738  | -5.012382 |
| C | -1.651426 | 3.659460  | 0.383265  |
| C | -1.177582 | 4.308708  | 1.528185  |
| C | -3.018198 | 3.355953  | 0.302926  |
| C | -2.038189 | 4.654131  | 2.579336  |
| H | -0.122072 | 4.554080  | 1.606257  |
| C | -3.907400 | 3.702597  | 1.326256  |
| H | -3.400717 | 2.865524  | -0.589794 |
| C | -3.398481 | 4.350320  | 2.460585  |
| H | -4.079783 | 4.631417  | 3.261913  |
| C | 4.707294  | 0.626748  | 1.132198  |
| C | 5.667047  | 1.104531  | 2.030820  |
| C | 5.139546  | -0.080195 | -0.000559 |
| C | 7.036412  | 0.889810  | 1.822224  |
| H | 5.349397  | 1.634608  | 2.923739  |
| C | 6.499249  | -0.328948 | -0.223479 |
| H | 4.406691  | -0.439631 | -0.719692 |
| C | 7.433277  | 0.162091  | 0.699182  |
| H | 8.492092  | -0.035312 | 0.538380  |
| C | 2.896014  | 0.911931  | 2.878546  |
| C | 2.759920  | 2.126058  | 3.555961  |
| C | 2.780110  | -0.280901 | 3.609792  |
| C | 2.511985  | 2.166894  | 4.938742  |
| H | 2.839139  | 3.060934  | 3.007528  |

|   |           |           |           |
|---|-----------|-----------|-----------|
| C | 2.534191  | -0.273242 | 4.983547  |
| H | 2.870365  | -1.231585 | 3.090160  |
| C | 2.400191  | 0.963042  | 5.635086  |
| H | 2.200234  | 0.982450  | 6.705312  |
| C | 2.367962  | 3.495939  | 5.646233  |
| H | 2.162819  | 3.361393  | 6.713173  |
| H | 3.280424  | 4.098744  | 5.555353  |
| H | 1.550012  | 4.091216  | 5.220476  |
| C | 2.421420  | -1.565583 | 5.760459  |
| H | 1.556562  | -1.554024 | 6.434774  |
| H | 2.319032  | -2.424567 | 5.090144  |
| H | 3.310463  | -1.733811 | 6.383129  |
| C | 8.054709  | 1.438042  | 2.796498  |
| H | 8.241510  | 2.505968  | 2.619656  |
| H | 7.712570  | 1.339081  | 3.833078  |
| H | 9.015285  | 0.919844  | 2.705983  |
| C | 6.969220  | -1.106319 | -1.431760 |
| H | 7.823491  | -1.746650 | -1.183006 |
| H | 6.173243  | -1.734837 | -1.840003 |
| H | 7.289045  | -0.431531 | -2.236068 |
| C | -0.194230 | 4.342005  | -5.736863 |
| H | 0.620931  | 3.613285  | -5.674054 |
| H | -1.013658 | 3.869116  | -6.295274 |
| H | 0.154683  | 5.191662  | -6.334237 |
| C | -2.317989 | 7.804921  | -2.712112 |
| H | -2.003796 | 8.267999  | -1.769654 |
| H | -2.065684 | 8.491086  | -3.527495 |
| H | -3.412816 | 7.723146  | -2.679745 |
| C | -1.498080 | 5.327589  | 3.820983  |
| H | -1.038876 | 4.597933  | 4.501995  |
| H | -0.727022 | 6.065974  | 3.573124  |
| H | -2.290133 | 5.839448  | 4.377800  |
| C | -5.386230 | 3.413669  | 1.192809  |
| H | -5.910355 | 3.570207  | 2.141428  |
| H | -5.851008 | 4.071665  | 0.446847  |
| H | -5.571337 | 2.382610  | 0.870903  |
| C | -6.594426 | -0.583695 | -3.495542 |
| H | -6.536401 | 0.449377  | -3.863836 |
| H | -5.796412 | -1.148270 | -3.988905 |
| H | -7.555683 | -0.991624 | -3.827866 |
| C | -8.687911 | -0.332064 | 1.106735  |
| H | -9.001221 | -1.298584 | 1.523916  |
| H | -8.489476 | 0.332954  | 1.955159  |
| H | -9.538020 | 0.075419  | 0.549728  |
| C | -3.994140 | -3.789235 | 4.882787  |
| H | -4.815738 | -4.386915 | 4.469534  |
| H | -3.074723 | -4.374035 | 4.747834  |
| H | -4.164361 | -3.683924 | 5.959060  |
| C | -3.706849 | 1.258179  | 5.148724  |
| H | -2.929393 | 1.207960  | 5.921082  |
| H | -3.506204 | 2.133898  | 4.524129  |
| H | -4.660717 | 1.426116  | 5.665968  |
| C | 0.958396  | -4.162979 | -5.794749 |
| H | -0.043450 | -3.723630 | -5.864683 |
| H | 1.670925  | -3.396515 | -6.127862 |
| H | 1.012597  | -4.993459 | -6.506520 |

|   |           |           |           |
|---|-----------|-----------|-----------|
| C | 2.984307  | -7.545173 | -2.611530 |
| H | 3.962388  | -7.373718 | -2.143996 |
| H | 2.419037  | -8.200945 | -1.937600 |
| H | 3.153450  | -8.091069 | -3.545378 |
| C | 4.932810  | -3.475504 | 2.039264  |
| H | 5.187171  | -3.306319 | 3.091440  |
| H | 5.541486  | -4.321334 | 1.691192  |
| H | 5.240251  | -2.592920 | 1.470790  |
| C | 0.641451  | -5.536804 | 3.766437  |
| H | -0.074925 | -4.879750 | 4.277716  |
| H | 0.067510  | -6.371261 | 3.346016  |
| H | 1.316901  | -5.942382 | 4.526818  |
| H | -0.746303 | 0.749368  | -4.976501 |
| C | -2.699087 | 0.946040  | -3.091195 |
| H | -3.581797 | 0.782604  | -3.730064 |
| H | -3.067270 | 1.032821  | -2.062993 |
| H | -2.276401 | 1.915045  | -3.374347 |

TS6

|                                               |                             |         |         |
|-----------------------------------------------|-----------------------------|---------|---------|
| B3LYP SCF energy:                             | -4071.44150779 a.u.         |         |         |
| B3LYP enthalpy:                               | -4069.654565 a.u.           |         |         |
| B3LYP free energy:                            | -4069.914959 a.u.           |         |         |
| M06 SCF energy in solution:                   | -5408.96531249 a.u.         |         |         |
| M06 enthalpy in solution:                     | -5407.178370 a.u.           |         |         |
| M06 free energy in solution:                  | -5407.438764 a.u.           |         |         |
| Three lowest frequencies (cm <sup>-1</sup> ): | -1053.7021                  | 12.4928 | 13.5605 |
| Imaginary frequency:                          | -1053.7021 cm <sup>-1</sup> |         |         |

Cartesian coordinates

| ATOM | X         | Y         | Z         |
|------|-----------|-----------|-----------|
| Ni   | -0.078872 | 0.034048  | -2.415268 |
| N    | -0.390185 | -0.919097 | 0.388982  |
| N    | 0.546538  | 1.028543  | 0.307745  |
| C    | 0.006471  | 0.051791  | -0.507198 |
| C    | -0.091831 | -0.555396 | 1.703769  |
| H    | -0.320447 | -1.196367 | 2.537260  |
| C    | 0.466651  | 0.670829  | 1.654699  |
| H    | 0.823096  | 1.318309  | 2.437012  |
| C    | 1.798696  | 0.180689  | -3.053117 |
| C    | 0.971961  | 0.149811  | -4.224308 |
| H    | -0.557690 | -0.040325 | -3.863890 |
| C    | -1.955727 | -0.295300 | -3.129118 |
| C    | -2.904648 | 0.704384  | -3.429583 |
| C    | -2.390664 | -1.630182 | -3.281418 |
| C    | -4.204736 | 0.395251  | -3.843406 |
| H    | -2.630709 | 1.753065  | -3.353635 |
| C    | -3.690757 | -1.949535 | -3.679454 |
| H    | -1.701181 | -2.446857 | -3.080876 |
| C    | -4.606245 | -0.935683 | -3.970763 |
| H    | -5.612332 | -1.180756 | -4.303488 |
| C    | 1.241306  | 2.219203  | -0.124414 |
| C    | 2.642593  | 2.290636  | 0.025924  |
| C    | 0.516821  | 3.323984  | -0.635489 |
| C    | 3.318548  | 3.438374  | -0.413632 |

|   |           |           |           |
|---|-----------|-----------|-----------|
| C | 1.222259  | 4.452985  | -1.044914 |
| C | 2.616589  | 4.512575  | -0.956754 |
| H | 4.397105  | 3.466272  | -0.326307 |
| H | 0.698851  | 5.311356  | -1.447940 |
| C | -1.072613 | -2.152100 | 0.069483  |
| C | -2.438331 | -2.300438 | 0.424317  |
| C | -0.367902 | -3.214710 | -0.528102 |
| C | -3.089635 | -3.484184 | 0.088438  |
| C | -1.054337 | -4.398655 | -0.833161 |
| C | -2.412761 | -4.529149 | -0.546811 |
| H | -4.142410 | -3.612821 | 0.311761  |
| H | -0.508669 | -5.205592 | -1.303931 |
| C | 1.142324  | -3.143527 | -0.796659 |
| H | 1.361203  | -2.113458 | -1.095364 |
| C | -3.187188 | -1.238536 | 1.242328  |
| H | -2.767058 | -0.265112 | 0.969260  |
| C | -1.017700 | 3.334300  | -0.681709 |
| H | -1.331543 | 2.345836  | -1.037019 |
| C | 3.456664  | 1.187340  | 0.720358  |
| H | 2.929283  | 0.242547  | 0.554091  |
| H | -3.988350 | -2.992566 | -3.768698 |
| H | -4.902229 | 1.198622  | -4.073296 |
| O | -3.158494 | -5.635726 | -0.827267 |
| O | 3.189999  | 5.663368  | -1.410020 |
| C | -2.529094 | -6.719252 | -1.493542 |
| H | -3.306270 | -7.471920 | -1.639266 |
| H | -2.128179 | -6.415195 | -2.469053 |
| H | -1.717453 | -7.148557 | -0.891096 |
| C | 4.604182  | 5.771741  | -1.368882 |
| H | 5.086665  | 4.987044  | -1.965805 |
| H | 4.841246  | 6.748445  | -1.794910 |
| H | 4.984217  | 5.723960  | -0.339554 |
| C | -1.648614 | 3.529765  | 0.702046  |
| C | -2.969872 | 3.103478  | 0.904932  |
| C | -0.991757 | 4.191357  | 1.742920  |
| C | -3.640932 | 3.348028  | 2.106893  |
| H | -3.493135 | 2.597171  | 0.096336  |
| C | -1.627634 | 4.430607  | 2.970648  |
| H | 0.029559  | 4.534227  | 1.600259  |
| C | -2.950182 | 4.010238  | 3.133539  |
| H | -3.460979 | 4.209384  | 4.074311  |
| C | -1.560038 | 4.351973  | -1.700378 |
| C | -2.167503 | 5.553247  | -1.317487 |
| C | -1.426556 | 4.078721  | -3.067443 |
| C | -2.644451 | 6.464220  | -2.269239 |
| H | -2.283072 | 5.784818  | -0.263150 |
| C | -1.900172 | 4.963149  | -4.043261 |
| H | -0.942926 | 3.155364  | -3.375718 |
| C | -2.510633 | 6.151231  | -3.625918 |
| H | -2.891812 | 6.844535  | -4.373830 |
| C | 4.855211  | 1.008009  | 0.105221  |
| C | 6.014938  | 1.500164  | 0.711383  |
| C | 4.974899  | 0.335885  | -1.120071 |
| C | 7.274997  | 1.335853  | 0.115288  |
| H | 5.944912  | 2.012903  | 1.666400  |
| C | 6.214738  | 0.156236  | -1.739899 |

|   |           |           |           |
|---|-----------|-----------|-----------|
| H | 4.079490  | -0.038160 | -1.607037 |
| C | 7.357501  | 0.667405  | -1.108482 |
| H | 8.329645  | 0.540340  | -1.582228 |
| C | 3.526445  | 1.383474  | 2.243806  |
| C | 3.503109  | 2.642665  | 2.848337  |
| C | 3.646139  | 0.248546  | 3.061889  |
| C | 3.599007  | 2.784719  | 4.243096  |
| H | 3.399983  | 3.533193  | 2.234500  |
| C | 3.744768  | 0.356994  | 4.449873  |
| H | 3.647362  | -0.736891 | 2.603076  |
| C | 3.719442  | 1.636510  | 5.026577  |
| H | 3.788628  | 1.734681  | 6.108826  |
| C | 1.558963  | -4.028259 | -1.983606 |
| C | 2.212426  | -5.254308 | -1.816820 |
| C | 1.237187  | -3.613092 | -3.282537 |
| C | 2.546482  | -6.057073 | -2.916447 |
| H | 2.469477  | -5.593536 | -0.817570 |
| C | 1.554117  | -4.392211 | -4.400236 |
| H | 0.714102  | -2.669932 | -3.418158 |
| C | 2.206750  | -5.614796 | -4.198817 |
| H | 2.453826  | -6.234014 | -5.059702 |
| C | 1.987549  | -3.430367 | 0.450873  |
| C | 1.502765  | -4.139099 | 1.552796  |
| C | 3.329728  | -3.017804 | 0.457301  |
| C | 2.328798  | -4.439996 | 2.647365  |
| H | 0.467088  | -4.467045 | 1.566592  |
| C | 4.183541  | -3.317386 | 1.522049  |
| H | 3.722283  | -2.472243 | -0.398314 |
| C | 3.663662  | -4.029651 | 2.614146  |
| H | 4.317920  | -4.272816 | 3.449980  |
| C | -4.691117 | -1.158908 | 0.932190  |
| C | -5.638890 | -1.868514 | 1.683358  |
| C | -5.140386 | -0.333595 | -0.105170 |
| C | -7.007763 | -1.765049 | 1.417557  |
| H | -5.310088 | -2.495669 | 2.506630  |
| C | -6.508667 | -0.195169 | -0.383591 |
| H | -4.416589 | 0.204060  | -0.714156 |
| C | -7.426153 | -0.916469 | 0.386273  |
| H | -8.490525 | -0.810418 | 0.180982  |
| C | -2.954503 | -1.408625 | 2.754783  |
| C | -2.733398 | -2.653343 | 3.349891  |
| C | -2.997100 | -0.271149 | 3.576039  |
| C | -2.562299 | -2.778617 | 4.738836  |
| H | -2.686793 | -3.544761 | 2.730154  |
| C | -2.828495 | -0.362632 | 4.958791  |
| H | -3.148030 | 0.704712  | 3.121604  |
| C | -2.610478 | -1.627560 | 5.526137  |
| H | -2.471691 | -1.711711 | 6.602832  |
| C | -2.323225 | -4.138259 | 5.356825  |
| H | -2.248200 | -4.074376 | 6.447175  |
| H | -3.135900 | -4.835512 | 5.117704  |
| H | -1.395336 | -4.591467 | 4.984635  |
| C | -2.891562 | 0.870348  | 5.831799  |
| H | -2.129841 | 0.843375  | 6.619818  |
| H | -2.741839 | 1.781551  | 5.244066  |
| H | -3.866761 | 0.954739  | 6.330442  |



|   |           |           |           |
|---|-----------|-----------|-----------|
| C | -8.019255 | -2.528225 | 2.243294  |
| H | -8.653336 | -1.849518 | 2.828583  |
| H | -8.687732 | -3.123116 | 1.608667  |
| H | -7.528768 | -3.210368 | 2.945058  |
| C | -6.988664 | 0.702154  | -1.501366 |
| H | -8.015662 | 1.040797  | -1.325818 |
| H | -6.350874 | 1.585337  | -1.610766 |
| H | -6.970803 | 0.175800  | -2.463437 |
| C | 1.213737  | -3.915468 | -5.794564 |
| H | 0.248452  | -3.397461 | -5.817181 |
| H | 1.968467  | -3.211387 | -6.170351 |
| H | 1.166900  | -4.749840 | -6.502595 |
| C | 3.279977  | -7.364593 | -2.717295 |
| H | 3.006361  | -7.838109 | -1.767973 |
| H | 3.065172  | -8.073081 | -3.524755 |
| H | 4.367762  | -7.212255 | -2.699756 |
| C | 1.772697  | -5.182039 | 3.841822  |
| H | 1.181671  | -4.515556 | 4.484638  |
| H | 1.111740  | -6.000238 | 3.533038  |
| H | 2.571481  | -5.607407 | 4.458427  |
| C | 5.641948  | -2.918938 | 1.482412  |
| H | 6.018936  | -2.676049 | 2.482064  |
| H | 6.262387  | -3.737445 | 1.092553  |
| H | 5.803186  | -2.049061 | 0.838261  |
| C | 6.322475  | -0.587972 | -3.051911 |
| H | 6.580412  | -1.643542 | -2.891812 |
| H | 5.377036  | -0.563024 | -3.603466 |
| H | 7.101687  | -0.159417 | -3.692275 |
| C | 8.518443  | 1.852781  | 0.803642  |
| H | 8.340611  | 2.823387  | 1.280597  |
| H | 8.851912  | 1.164693  | 1.592128  |
| H | 9.348584  | 1.968641  | 0.098873  |
| C | 3.555375  | 4.159124  | 4.872941  |
| H | 4.297571  | 4.830573  | 4.424008  |
| H | 2.573989  | 4.632061  | 4.736072  |
| H | 3.753187  | 4.112587  | 5.948651  |
| C | 3.882031  | -0.872988 | 5.318564  |
| H | 3.190244  | -0.842255 | 6.168996  |
| H | 3.679763  | -1.785756 | 4.749771  |
| H | 4.895543  | -0.956249 | 5.733477  |
| C | -1.751230 | 4.637428  | -5.512469 |
| H | -0.700731 | 4.683459  | -5.827640 |
| H | -2.109058 | 3.625333  | -5.735421 |
| H | -2.314364 | 5.339471  | -6.136040 |
| C | -3.274247 | 7.768780  | -1.835010 |
| H | -3.765690 | 7.671607  | -0.860937 |
| H | -2.521593 | 8.563587  | -1.740971 |
| H | -4.020572 | 8.114690  | -2.558629 |
| C | -5.090327 | 2.952215  | 2.280385  |
| H | -5.326219 | 2.737713  | 3.328410  |
| H | -5.758248 | 3.762420  | 1.957313  |
| H | -5.341149 | 2.066701  | 1.687896  |
| C | -0.885599 | 5.122491  | 4.092255  |
| H | -0.161302 | 4.446865  | 4.567352  |
| H | -0.323882 | 5.989664  | 3.725368  |
| H | -1.570490 | 5.470011  | 4.872716  |

|   |           |           |           |
|---|-----------|-----------|-----------|
| H | 0.977045  | -0.783180 | -4.793425 |
| H | 2.370850  | -0.711785 | -2.803306 |
| H | 2.270771  | 1.121021  | -2.774094 |
| C | 0.839525  | 1.384174  | -5.106137 |
| H | -0.093875 | 1.387683  | -5.681630 |
| H | 0.873289  | 2.300411  | -4.507523 |
| H | 1.671951  | 1.426184  | -5.821116 |

TS7

|                                  |                     |         |         |
|----------------------------------|---------------------|---------|---------|
| B3LYP SCF energy:                | -2057.75000396 a.u. |         |         |
| B3LYP enthalpy:                  | -2056.846124 a.u.   |         |         |
| B3LYP free energy:               | -2056.985513 a.u.   |         |         |
| M06 SCF energy in solution:      | -3396.12085186 a.u. |         |         |
| M06 enthalpy in solution:        | -3395.216972 a.u.   |         |         |
| M06 free energy in solution:     | -3395.356361 a.u.   |         |         |
| Three lowest frequencies (cm-1): | -899.4300           | 15.2461 | 15.8632 |
| Imaginary frequency:             | -899.4300 cm-1      |         |         |

Cartesian coordinates

| ATOM | X         | Y         | Z         |
|------|-----------|-----------|-----------|
| Ni   | -0.543287 | -0.190286 | -1.467992 |
| Al   | 6.204244  | -1.290829 | -0.551497 |
| N    | -0.934929 | 1.346493  | 1.069608  |
| N    | -2.364646 | -0.258939 | 0.889525  |
| N    | 4.187660  | -0.948708 | -0.884232 |
| C    | -1.296733 | 0.315183  | 0.231759  |
| C    | -1.757618 | 1.412436  | 2.191877  |
| C    | -2.645546 | 0.400040  | 2.085741  |
| C    | 3.690411  | 0.273747  | -1.165592 |
| C    | 2.338903  | 0.507054  | -1.377316 |
| C    | 1.391800  | -0.538144 | -1.292395 |
| C    | 1.947026  | -1.808794 | -1.015879 |
| C    | 3.310320  | -1.971730 | -0.816193 |
| C    | 6.222591  | -1.880345 | 1.363027  |
| C    | 6.614053  | -2.722620 | -1.888748 |
| C    | 7.030634  | 0.498286  | -0.907161 |
| C    | -1.096236 | -0.628102 | -3.438502 |
| C    | -2.173671 | -0.082095 | -2.707811 |
| C    | 0.237056  | 2.189242  | 0.955620  |
| C    | 0.199749  | 3.325216  | 0.119306  |
| C    | 1.355409  | 1.879541  | 1.759038  |
| C    | 1.343772  | 4.131352  | 0.071008  |
| C    | 2.468392  | 2.726358  | 1.675426  |
| C    | 2.469917  | 3.834522  | 0.835417  |
| C    | -1.058380 | 3.726617  | -0.644693 |
| C    | 1.379669  | 0.709317  | 2.740897  |
| C    | 2.611258  | -0.197353 | 2.566029  |
| C    | 1.292548  | 1.222226  | 4.194415  |
| C    | -0.766266 | 4.358704  | -2.016422 |
| C    | -1.924035 | 4.677705  | 0.210004  |
| C    | -3.121781 | -1.422529 | 0.480602  |
| C    | -4.446507 | -1.244942 | 0.024372  |
| C    | -2.545955 | -2.704532 | 0.636856  |
| C    | -5.183651 | -2.392235 | -0.299687 |

|   |           |           |           |
|---|-----------|-----------|-----------|
| C | -4.630877 | -3.661846 | -0.180801 |
| C | -3.326890 | -3.811844 | 0.283972  |
| C | -5.113363 | 0.124810  | -0.096247 |
| C | -5.834445 | 0.318828  | -1.444682 |
| C | -6.108557 | 0.360055  | 1.060669  |
| C | -1.157894 | -2.906353 | 1.243288  |
| C | -0.443985 | -4.171881 | 0.738089  |
| C | -1.241816 | -2.933885 | 2.785547  |
| H | -1.617375 | 2.159459  | 2.956399  |
| H | -3.439944 | 0.079664  | 2.739802  |
| H | 4.420240  | 1.075115  | -1.218110 |
| H | 2.025535  | 1.522854  | -1.599774 |
| H | 0.393015  | -0.624550 | -2.557775 |
| H | 1.313724  | -2.689346 | -0.966222 |
| H | 3.739806  | -2.945922 | -0.600081 |
| H | 5.870992  | -1.100477 | 2.054732  |
| H | 7.242095  | -2.140495 | 1.685273  |
| H | 5.606828  | -2.772337 | 1.553155  |
| H | 6.025857  | -3.641843 | -1.747116 |
| H | 7.669719  | -3.026691 | -1.826499 |
| H | 6.447486  | -2.397964 | -2.926204 |
| H | 6.872843  | 0.864793  | -1.932435 |
| H | 8.121347  | 0.436374  | -0.774787 |
| H | 6.691593  | 1.292720  | -0.225119 |
| H | 3.346361  | 2.510418  | 2.276420  |
| H | 1.350789  | 5.010859  | -0.564470 |
| H | 0.497917  | 0.089298  | 2.556085  |
| H | -1.641703 | 2.820481  | -0.825225 |
| H | 2.165246  | 1.835260  | 4.448099  |
| H | 1.260115  | 0.379789  | 4.895138  |
| H | 0.398923  | 1.834706  | 4.359587  |
| H | 2.555923  | -1.037884 | 3.267772  |
| H | 3.548117  | 0.332562  | 2.769367  |
| H | 2.667187  | -0.603827 | 1.553837  |
| H | -1.379146 | 5.601187  | 0.439881  |
| H | -2.214566 | 4.214657  | 1.159289  |
| H | -2.840556 | 4.950180  | -0.327124 |
| H | -1.702872 | 4.500585  | -2.566937 |
| H | -0.109625 | 3.723746  | -2.621205 |
| H | -0.294415 | 5.343803  | -1.925773 |
| H | 3.346211  | 4.475000  | 0.782293  |
| H | -6.204869 | -2.286200 | -0.652575 |
| H | -5.218010 | -4.537988 | -0.442750 |
| H | -4.333491 | 0.889842  | -0.028268 |
| H | -5.177238 | 0.103825  | -2.291510 |
| H | -6.180563 | 1.354783  | -1.536298 |
| H | -6.716569 | -0.325787 | -1.530102 |
| H | -6.560553 | 1.355625  | 0.980052  |
| H | -5.626429 | 0.287879  | 2.040933  |
| H | -6.917274 | -0.379750 | 1.034788  |
| H | -0.537237 | -2.053294 | 0.955057  |
| H | -0.441762 | -4.228748 | -0.356071 |
| H | -0.905142 | -5.089103 | 1.122715  |
| H | 0.596134  | -4.168223 | 1.081375  |
| H | -1.671969 | -2.010876 | 3.187463  |
| H | -0.242292 | -3.056425 | 3.219217  |

|   |           |           |           |
|---|-----------|-----------|-----------|
| H | -1.862959 | -3.771794 | 3.124844  |
| H | -2.913726 | -4.809479 | 0.384794  |
| H | -0.627851 | -0.034968 | -4.224513 |
| H | -1.042685 | -1.703300 | -3.604452 |
| H | -2.900802 | -0.783708 | -2.304586 |
| C | -2.695902 | 1.304418  | -3.021586 |
| H | -3.160960 | 1.780144  | -2.151677 |
| H | -1.893746 | 1.962836  | -3.371993 |
| H | -3.457833 | 1.270832  | -3.815244 |

TS8

|                                  |                     |         |         |
|----------------------------------|---------------------|---------|---------|
| B3LYP SCF energy:                | -2057.75575217 a.u. |         |         |
| B3LYP enthalpy:                  | -2056.851577 a.u.   |         |         |
| B3LYP free energy:               | -2056.990731 a.u.   |         |         |
| M06 SCF energy in solution:      | -3396.12480495 a.u. |         |         |
| M06 enthalpy in solution:        | -3395.220630 a.u.   |         |         |
| M06 free energy in solution:     | -3395.359784 a.u.   |         |         |
| Three lowest frequencies (cm-1): | -608.8499           | 11.6719 | 17.5556 |
| Imaginary frequency:             | -608.8499 cm-1      |         |         |

Cartesian coordinates

| ATOM | X         | Y         | Z         |
|------|-----------|-----------|-----------|
| Ni   | 0.546138  | -0.236847 | -1.416697 |
| Al   | -6.129972 | -1.409679 | -0.325641 |
| N    | 2.341932  | -0.101189 | 0.995093  |
| N    | 0.896964  | 1.496549  | 0.986967  |
| N    | -4.111020 | -1.105939 | -0.661613 |
| C    | 1.280952  | 0.390153  | 0.266375  |
| C    | 2.595339  | 0.678029  | 2.123685  |
| C    | 1.696768  | 1.686681  | 2.111170  |
| C    | -3.185462 | -2.074663 | -0.505265 |
| C    | -1.832799 | -1.870048 | -0.742896 |
| C    | -1.339346 | -0.609877 | -1.151563 |
| C    | -2.337028 | 0.379150  | -1.321935 |
| C    | -3.671379 | 0.104180  | -1.069738 |
| C    | -6.551967 | 0.015493  | 1.020174  |
| C    | -6.915164 | -1.120825 | -2.143212 |
| C    | -6.196613 | -3.287218 | 0.367752  |
| C    | 1.327799  | -0.599098 | -3.386405 |
| C    | 2.278499  | -0.068753 | -2.512630 |
| C    | 3.157243  | -1.253161 | 0.679319  |
| C    | 4.477081  | -1.040402 | 0.223137  |
| C    | 2.636403  | -2.547052 | 0.906074  |
| C    | 5.268479  | -2.169841 | -0.027126 |
| C    | 3.470135  | -3.636509 | 0.625439  |
| C    | 4.771114  | -3.454091 | 0.162506  |
| C    | 5.080878  | 0.351085  | 0.029538  |
| C    | 1.248632  | -2.767547 | 1.506562  |
| C    | 0.609793  | -4.108075 | 1.106048  |
| C    | 1.301455  | -2.652453 | 3.046284  |
| C    | 5.771431  | 0.523176  | -1.337789 |
| C    | 6.078307  | 0.679743  | 1.161361  |
| C    | -0.235171 | 2.352534  | 0.713448  |
| C    | -0.137920 | 3.323006  | -0.304789 |

|   |           |           |           |
|---|-----------|-----------|-----------|
| C | -1.380124 | 2.223908  | 1.529462  |
| C | -1.248468 | 4.149756  | -0.519544 |
| C | -2.398926 | 4.029365  | 0.255422  |
| C | -2.456915 | 3.082085  | 1.273283  |
| C | 1.135163  | 3.547330  | -1.115900 |
| C | 0.874775  | 3.548099  | -2.633456 |
| C | 1.834290  | 4.850590  | -0.676224 |
| C | -1.472106 | 1.231444  | 2.687764  |
| C | -2.709483 | 0.320182  | 2.598631  |
| C | -1.442861 | 1.972436  | 4.041477  |
| H | 3.382937  | 0.434758  | 2.818032  |
| H | 1.538710  | 2.510360  | 2.788585  |
| H | -3.566451 | -3.038699 | -0.182866 |
| H | -1.160537 | -2.712663 | -0.615642 |
| H | -0.355708 | -0.713924 | -2.499242 |
| H | -2.075797 | 1.380585  | -1.650306 |
| H | -4.436199 | 0.865898  | -1.190580 |
| H | -6.015303 | -0.124722 | 1.970165  |
| H | -7.623724 | 0.016422  | 1.269414  |
| H | -6.321669 | 1.033795  | 0.671443  |
| H | -6.721663 | -0.116199 | -2.548363 |
| H | -8.009229 | -1.236860 | -2.125684 |
| H | -6.540494 | -1.838325 | -2.887764 |
| H | -5.853977 | -4.043153 | -0.354664 |
| H | -7.234909 | -3.556968 | 0.613075  |
| H | -5.620350 | -3.440323 | 1.292705  |
| H | 0.846253  | 0.080563  | -4.088806 |
| H | 2.535832  | 0.985963  | -2.555106 |
| H | 3.017656  | -0.726760 | -2.065934 |
| H | 3.101386  | -4.644375 | 0.780951  |
| H | 6.287246  | -2.038460 | -0.379019 |
| H | 0.592482  | -1.975450 | 1.133880  |
| H | 4.269634  | 1.083998  | 0.077308  |
| H | 1.958999  | -3.420981 | 3.470611  |
| H | 0.300802  | -2.790266 | 3.472382  |
| H | 1.672494  | -1.674588 | 3.369680  |
| H | -0.433350 | -4.131367 | 1.439268  |
| H | 1.114074  | -4.962528 | 1.572472  |
| H | 0.623645  | -4.259192 | 0.020831  |
| H | 6.925537  | -0.016032 | 1.150638  |
| H | 5.613313  | 0.616823  | 2.150767  |
| H | 6.475273  | 1.694294  | 1.038883  |
| H | 6.109230  | 1.559566  | -1.453972 |
| H | 5.096263  | 0.291305  | -2.166349 |
| H | 6.655141  | -0.118035 | -1.431979 |
| H | 5.399438  | -4.316590 | -0.043128 |
| H | -1.205376 | 4.908081  | -1.295902 |
| H | -3.248441 | 4.681727  | 0.071986  |
| H | 1.820130  | 2.721367  | -0.907905 |
| H | 0.393375  | 2.616941  | -2.950376 |
| H | 1.820753  | 3.646705  | -3.179239 |
| H | 0.232998  | 4.382179  | -2.939217 |
| H | 2.771093  | 4.989530  | -1.229153 |
| H | 2.070709  | 4.834898  | 0.393747  |
| H | 1.200543  | 5.725216  | -0.864399 |
| H | -0.595116 | 0.578863  | 2.650651  |

|   |           |           |           |
|---|-----------|-----------|-----------|
| H | -2.712897 | -0.253718 | 1.669422  |
| H | -3.646629 | 0.884632  | 2.648518  |
| H | -2.708582 | -0.387148 | 3.436494  |
| H | -0.546988 | 2.595162  | 4.148461  |
| H | -1.456893 | 1.254029  | 4.869401  |
| H | -2.315062 | 2.627099  | 4.152477  |
| H | -3.355663 | 3.002028  | 1.877246  |
| C | 1.343748  | -2.053542 | -3.813151 |
| H | 0.347338  | -2.417228 | -4.084361 |
| H | 1.992246  | -2.172264 | -4.692186 |
| H | 1.738824  | -2.695991 | -3.019369 |

TS9

|                                               |                             |         |         |
|-----------------------------------------------|-----------------------------|---------|---------|
| B3LYP SCF energy:                             | -1099.87265589 a.u.         |         |         |
| B3LYP enthalpy:                               | -1099.428006 a.u.           |         |         |
| B3LYP free energy:                            | -1099.503576 a.u.           |         |         |
| M06 SCF energy in solution:                   | -2438.66131865 a.u.         |         |         |
| M06 enthalpy in solution:                     | -2438.216669 a.u.           |         |         |
| M06 free energy in solution:                  | -2438.292239 a.u.           |         |         |
| Three lowest frequencies (cm <sup>-1</sup> ): | -1077.3718                  | 36.5835 | 44.4541 |
| Imaginary frequency:                          | -1077.3718 cm <sup>-1</sup> |         |         |

Cartesian coordinates

| ATOM | X         | Y         | Z         |
|------|-----------|-----------|-----------|
| Ni   | -1.752674 | 0.305902  | 0.155032  |
| P    | 0.400090  | 0.000378  | -0.002601 |
| C    | 1.083623  | -0.464973 | 1.759972  |
| C    | 0.349914  | 0.431074  | 2.789324  |
| C    | 0.669156  | -1.912718 | 2.104633  |
| C    | 2.605676  | -0.329707 | 1.960731  |
| H    | 0.591794  | 1.489560  | 2.695686  |
| H    | -0.738194 | 0.326277  | 2.703915  |
| H    | 0.637796  | 0.116060  | 3.801684  |
| H    | 1.220275  | -2.663808 | 1.534455  |
| H    | 0.882584  | -2.092778 | 3.166501  |
| H    | -0.403150 | -2.073885 | 1.951440  |
| H    | 2.863081  | -0.650453 | 2.979689  |
| H    | 3.177159  | -0.954484 | 1.268762  |
| H    | 2.952924  | 0.701201  | 1.853150  |
| C    | 0.820469  | -1.438455 | -1.239850 |
| C    | 2.242084  | -2.025412 | -1.128982 |
| C    | -0.216525 | -2.567466 | -1.022012 |
| C    | 0.603096  | -0.950639 | -2.689645 |
| H    | 3.021267  | -1.272941 | -1.275790 |
| H    | 2.420261  | -2.515109 | -0.168004 |
| H    | 2.374794  | -2.789850 | -1.906769 |
| H    | -1.237206 | -2.180915 | -1.107047 |
| H    | -0.071815 | -3.333523 | -1.796034 |
| H    | -0.121800 | -3.060676 | -0.054549 |
| H    | 0.661815  | -1.818353 | -3.359937 |
| H    | -0.384550 | -0.496973 | -2.819100 |
| H    | 1.363595  | -0.239487 | -3.019981 |
| C    | 1.281009  | 1.625617  | -0.611029 |
| C    | 1.237856  | 2.679448  | 0.517555  |

|   |           |           |           |
|---|-----------|-----------|-----------|
| C | 2.740414  | 1.467130  | -1.081355 |
| C | 0.435885  | 2.220885  | -1.764308 |
| H | 0.222505  | 2.812906  | 0.905227  |
| H | 1.905400  | 2.446044  | 1.350348  |
| H | 1.562525  | 3.643846  | 0.105541  |
| H | 2.827392  | 0.834995  | -1.968897 |
| H | 3.137532  | 2.455073  | -1.352334 |
| H | 3.393016  | 1.055932  | -0.306600 |
| H | 0.853632  | 3.200239  | -2.034802 |
| H | 0.437489  | 1.606062  | -2.664220 |
| H | -0.604393 | 2.362924  | -1.456350 |
| O | -3.548166 | 0.665923  | 0.064607  |
| C | -4.558394 | -0.326609 | -0.036921 |
| H | -4.186038 | -1.349769 | 0.107575  |
| H | -5.302215 | -0.122378 | 0.743449  |
| H | -5.064093 | -0.274517 | -1.013434 |
| H | -2.700112 | 0.491427  | -1.031005 |

TS10

|                                  |                     |        |         |
|----------------------------------|---------------------|--------|---------|
| B3LYP SCF energy:                | -1640.65597371 a.u. |        |         |
| B3LYP enthalpy:                  | -1639.970567 a.u.   |        |         |
| B3LYP free energy:               | -1640.071060 a.u.   |        |         |
| M06 SCF energy in solution:      | -2979.21660687 a.u. |        |         |
| M06 enthalpy in solution:        | -2978.531200 a.u.   |        |         |
| M06 free energy in solution:     | -2978.631693 a.u.   |        |         |
| Three lowest frequencies (cm-1): | -125.6037           | 5.6475 | 13.9153 |
| Imaginary frequency:             | -125.6037 cm-1      |        |         |

Cartesian coordinates

| ATOM | X         | Y         | Z         |
|------|-----------|-----------|-----------|
| Ni   | -0.010580 | 0.123866  | -1.591512 |
| C    | -1.764517 | 0.744439  | -1.862719 |
| O    | -1.535870 | 1.882118  | -2.313646 |
| H    | -1.441228 | -0.205653 | -2.527229 |
| P    | 1.496600  | -0.031411 | -0.042544 |
| C    | 1.420931  | 1.472539  | 1.094323  |
| C    | 2.474865  | 1.539521  | 2.216983  |
| C    | 1.407886  | 2.782762  | 0.275264  |
| H    | 0.430009  | 1.384969  | 1.563047  |
| C    | 2.248561  | 2.762404  | 3.124623  |
| H    | 3.476967  | 1.613194  | 1.772505  |
| H    | 2.463319  | 0.622496  | 2.819072  |
| C    | 1.196613  | 4.007040  | 1.183579  |
| H    | 2.363519  | 2.896825  | -0.257944 |
| H    | 0.623276  | 2.738306  | -0.489025 |
| C    | 2.232839  | 4.067139  | 2.315409  |
| H    | 3.026509  | 2.800227  | 3.898146  |
| H    | 1.289092  | 2.648635  | 3.650493  |
| H    | 1.233698  | 4.923554  | 0.581456  |
| H    | 0.186912  | 3.960397  | 1.617531  |
| H    | 2.028707  | 4.920609  | 2.974385  |
| H    | 3.231122  | 4.236457  | 1.884620  |
| C    | 3.277172  | -0.037101 | -0.696829 |
| C    | 4.338122  | -0.768704 | 0.152986  |

|   |           |           |           |
|---|-----------|-----------|-----------|
| C | 3.329377  | -0.528145 | -2.161397 |
| H | 3.540728  | 1.031416  | -0.707348 |
| C | 5.745964  | -0.599811 | -0.447803 |
| H | 4.101396  | -1.840178 | 0.195912  |
| H | 4.332295  | -0.405651 | 1.186456  |
| C | 4.736829  | -0.371452 | -2.760166 |
| H | 3.028879  | -1.584826 | -2.205409 |
| H | 2.596419  | 0.024305  | -2.762507 |
| C | 5.800355  | -1.076832 | -1.906104 |
| H | 6.475767  | -1.148300 | 0.161760  |
| H | 6.033960  | 0.460950  | -0.400649 |
| H | 4.749906  | -0.760968 | -3.786023 |
| H | 4.979861  | 0.699349  | -2.829405 |
| H | 6.800452  | -0.907155 | -2.324718 |
| H | 5.628206  | -2.163091 | -1.937092 |
| C | 1.351776  | -1.512849 | 1.113560  |
| C | 0.103118  | -1.406167 | 2.015993  |
| C | 1.302900  | -2.825925 | 0.300843  |
| H | 2.240485  | -1.535529 | 1.759765  |
| C | -0.058554 | -2.642390 | 2.918209  |
| H | -0.787874 | -1.295892 | 1.380733  |
| H | 0.153886  | -0.509017 | 2.643496  |
| C | 1.152502  | -4.058404 | 1.208445  |
| H | 0.452049  | -2.774268 | -0.392927 |
| H | 2.200252  | -2.930989 | -0.320567 |
| C | -0.086492 | -3.944553 | 2.106891  |
| H | -0.973920 | -2.543382 | 3.515554  |
| H | 0.777812  | -2.678244 | 3.632140  |
| H | 1.096408  | -4.964975 | 0.592284  |
| H | 2.050125  | -4.162386 | 1.836308  |
| H | -0.153705 | -4.810103 | 2.778170  |
| H | -0.990164 | -3.961987 | 1.480100  |
| C | -2.933415 | 0.440858  | -0.942992 |
| H | -2.786864 | -0.536221 | -0.467322 |
| H | -2.956321 | 1.207431  | -0.159089 |
| C | -4.277389 | 0.454498  | -1.716737 |
| H | -4.383456 | 1.436031  | -2.192621 |
| H | -4.230145 | -0.288492 | -2.523900 |
| C | -5.465846 | 0.167866  | -0.825581 |
| C | -6.131876 | 1.207586  | -0.161313 |
| C | -5.909786 | -1.145562 | -0.617429 |
| C | -7.207709 | 0.943931  | 0.687782  |
| H | -5.806020 | 2.233938  | -0.317319 |
| C | -6.984864 | -1.414719 | 0.231104  |
| H | -5.410654 | -1.964758 | -1.131518 |
| C | -7.637686 | -0.369596 | 0.887927  |
| H | -7.713802 | 1.765316  | 1.188775  |
| H | -7.316190 | -2.440163 | 0.374483  |
| H | -8.477521 | -0.576443 | 1.545971  |

TS11

|                    |                     |
|--------------------|---------------------|
| B3LYP SCF energy:  | -3953.53172616 a.u. |
| B3LYP enthalpy:    | -3951.832637 a.u.   |
| B3LYP free energy: | -3952.085149 a.u.   |



M06 SCF energy in solution: -5291.08771555 a.u.  
M06 enthalpy in solution: -5289.388626 a.u.  
M06 free energy in solution: -5289.641138 a.u.  
Three lowest frequencies (cm-1): -612.7443 13.2706 14.4894  
Imaginary frequency: -612.7443 cm-1

Cartesian coordinates

| ATOM | X         | Y         | Z         |
|------|-----------|-----------|-----------|
| N    | -0.131003 | -1.006330 | 0.649437  |
| N    | 0.115136  | 1.133826  | 0.721421  |
| C    | 0.043529  | 0.090017  | -0.163929 |
| C    | -0.164994 | -0.652788 | 1.995098  |
| H    | -0.292846 | -1.383673 | 2.776391  |
| C    | -0.020486 | 0.693460  | 2.040695  |
| H    | -0.014660 | 1.380435  | 2.871638  |
| C    | -0.358775 | -2.323945 | 0.108390  |
| C    | -1.678839 | -2.779835 | -0.047140 |
| C    | 0.742233  | -3.115357 | -0.294337 |
| C    | -1.901815 | -3.995235 | -0.708403 |
| C    | 0.487642  | -4.328280 | -0.926653 |
| C    | -0.825017 | -4.759402 | -1.161653 |
| H    | -2.923449 | -4.317576 | -0.867786 |
| H    | 1.303707  | -4.956279 | -1.264311 |
| C    | 0.324482  | 2.522440  | 0.387757  |
| C    | 1.618560  | 3.064122  | 0.480514  |
| C    | -0.781966 | 3.333302  | 0.038703  |
| C    | 1.793576  | 4.440275  | 0.276151  |
| C    | -0.565782 | 4.690854  | -0.177882 |
| C    | 0.708415  | 5.254029  | -0.044266 |
| H    | 2.788678  | 4.854646  | 0.374575  |
| H    | -1.386633 | 5.338109  | -0.464944 |
| C    | -2.195657 | 2.758286  | -0.108890 |
| H    | -2.073084 | 1.706740  | -0.387644 |
| C    | -2.855216 | -2.020278 | 0.573241  |
| H    | -2.555081 | -0.971047 | 0.644458  |
| C    | 2.851300  | 2.196971  | 0.760142  |
| H    | 2.487388  | 1.229073  | 1.117662  |
| C    | 2.174857  | -2.682783 | 0.039501  |
| H    | 2.234582  | -1.607619 | -0.162596 |
| O    | 0.784177  | 6.599012  | -0.254042 |
| O    | -0.944513 | -5.946804 | -1.817666 |
| C    | -2.246445 | -6.415035 | -2.133845 |
| H    | -2.102811 | -7.348910 | -2.680322 |
| H    | -2.836285 | -6.612468 | -1.228578 |
| H    | -2.787814 | -5.701047 | -2.767536 |
| C    | 2.053107  | 7.225367  | -0.153432 |
| H    | 2.760281  | 6.825570  | -0.892219 |
| H    | 1.880477  | 8.283988  | -0.356284 |
| H    | 2.481389  | 7.113098  | 0.851374  |
| C    | -4.105365 | -2.029381 | -0.316277 |
| C    | -4.111351 | -1.212440 | -1.456844 |
| C    | -5.237210 | -2.799308 | -0.033609 |
| C    | -5.219716 | -1.156248 | -2.307322 |
| H    | -3.232932 | -0.608503 | -1.681471 |
| C    | -6.362839 | -2.768117 | -0.870713 |
| H    | -5.256668 | -3.419072 | 0.858433  |

|   |           |           |           |
|---|-----------|-----------|-----------|
| C | -6.339271 | -1.940381 | -1.996328 |
| H | -7.213646 | -1.896415 | -2.643504 |
| C | -3.117408 | -2.482338 | 2.015966  |
| C | -3.500538 | -1.528047 | 2.972501  |
| C | -2.997305 | -3.815611 | 2.417685  |
| C | -3.767315 | -1.886020 | 4.296300  |
| H | -3.581325 | -0.484667 | 2.677919  |
| C | -3.261942 | -4.207899 | 3.739689  |
| H | -2.679930 | -4.568077 | 1.701258  |
| C | -3.643835 | -3.234170 | 4.663805  |
| H | -3.844305 | -3.526323 | 5.693446  |
| C | 2.484073  | -2.861592 | 1.532768  |
| C | 1.857038  | -3.833993 | 2.319022  |
| C | 3.446572  | -2.036215 | 2.128672  |
| C | 2.169698  | -3.984424 | 3.677798  |
| H | 1.105916  | -4.480793 | 1.873800  |
| C | 3.786559  | -2.164663 | 3.478830  |
| H | 3.943864  | -1.283895 | 1.520226  |
| C | 3.133254  | -3.142597 | 4.240781  |
| H | 3.381678  | -3.248128 | 5.295382  |
| C | 3.225109  | -3.338877 | -0.864243 |
| C | 3.960495  | -4.461748 | -0.466782 |
| C | 3.444745  | -2.803521 | -2.138528 |
| C | 4.899499  | -5.052686 | -1.320767 |
| H | 3.809498  | -4.878010 | 0.525320  |
| C | 4.379794  | -3.369798 | -3.014096 |
| H | 2.872104  | -1.934908 | -2.457742 |
| C | 5.099077  | -4.492595 | -2.587953 |
| H | 5.830893  | -4.940145 | -3.258558 |
| C | 3.691140  | 1.896649  | -0.493826 |
| C | 4.757792  | 0.990230  | -0.369892 |
| C | 3.450859  | 2.472235  | -1.742330 |
| C | 5.567313  | 0.655000  | -1.456103 |
| H | 4.973114  | 0.555370  | 0.603833  |
| C | 4.258069  | 2.170651  | -2.852569 |
| H | 2.625801  | 3.164858  | -1.869611 |
| C | 5.307910  | 1.264669  | -2.693453 |
| H | 5.944223  | 1.030320  | -3.545467 |
| C | 3.689061  | 2.783063  | 1.906293  |
| C | 3.330227  | 2.494631  | 3.230355  |
| C | 4.784693  | 3.622233  | 1.679359  |
| C | 4.029028  | 3.037291  | 4.313629  |
| H | 2.487835  | 1.831796  | 3.418974  |
| C | 5.509656  | 4.178178  | 2.742769  |
| H | 5.096383  | 3.829123  | 0.658708  |
| C | 5.117315  | 3.879851  | 4.051003  |
| H | 5.674684  | 4.304688  | 4.884281  |
| C | -2.948902 | 3.414412  | -1.277395 |
| C | -3.889707 | 4.428742  | -1.087718 |
| C | -2.656894 | 2.997202  | -2.585696 |
| C | -4.538686 | 5.030598  | -2.177717 |
| H | -4.135091 | 4.754358  | -0.080198 |
| C | -3.281075 | 3.582448  | -3.690385 |
| H | -1.917383 | 2.213859  | -2.737870 |
| C | -4.222937 | 4.598847  | -3.466881 |
| H | -4.719249 | 5.060738  | -4.319204 |

|   |           |           |           |
|---|-----------|-----------|-----------|
| C | -3.015006 | 2.776303  | 1.187171  |
| C | -4.178045 | 1.993266  | 1.244437  |
| C | -2.688190 | 3.569139  | 2.291078  |
| C | -5.014392 | 2.005945  | 2.364744  |
| H | -4.448479 | 1.380103  | 0.386685  |
| C | -3.496698 | 3.590907  | 3.437673  |
| H | -1.795296 | 4.187360  | 2.262399  |
| C | -4.655897 | 2.809582  | 3.456832  |
| H | -5.299926 | 2.831566  | 4.334439  |
| C | -3.124695 | -5.658947 | 4.144703  |
| H | -3.786223 | -6.304451 | 3.553269  |
| H | -2.101350 | -6.024056 | 3.990038  |
| H | -3.374565 | -5.805030 | 5.200463  |
| C | -4.182772 | -0.849110 | 5.315638  |
| H | -4.084513 | 0.165085  | 4.916846  |
| H | -5.228929 | -0.987495 | 5.619474  |
| H | -3.575126 | -0.917100 | 6.226437  |
| C | -5.204353 | -0.277091 | -3.537102 |
| H | -6.219606 | -0.061264 | -3.886690 |
| H | -4.701683 | 0.676447  | -3.342118 |
| H | -4.669656 | -0.763058 | -4.364373 |
| C | -7.571290 | -3.622843 | -0.560090 |
| H | -7.422386 | -4.660788 | -0.887836 |
| H | -7.776053 | -3.652490 | 0.516148  |
| H | -8.467744 | -3.248050 | -1.065113 |
| C | 4.843178  | -1.275459 | 4.095189  |
| H | 4.683750  | -0.221545 | 3.838522  |
| H | 4.849122  | -1.360297 | 5.186995  |
| H | 5.846480  | -1.545133 | 3.739653  |
| C | 1.463620  | -5.030944 | 4.510703  |
| H | 1.856713  | -5.062462 | 5.532007  |
| H | 0.386181  | -4.829993 | 4.573927  |
| H | 1.578340  | -6.032136 | 4.076947  |
| C | 4.613671  | -2.765293 | -4.380039 |
| H | 5.220463  | -3.423894 | -5.010376 |
| H | 3.666449  | -2.572747 | -4.895967 |
| H | 5.136541  | -1.802794 | -4.303156 |
| C | 5.664824  | -6.284321 | -0.890863 |
| H | 5.782487  | -6.323100 | 0.197485  |
| H | 5.145669  | -7.203672 | -1.194616 |
| H | 6.663349  | -6.314083 | -1.340879 |
| C | 6.715757  | 5.050286  | 2.475095  |
| H | 6.574393  | 5.668706  | 1.581775  |
| H | 6.925528  | 5.715952  | 3.319111  |
| H | 7.615198  | 4.442941  | 2.306389  |
| C | 3.605996  | 2.744024  | 5.735487  |
| H | 4.470773  | 2.662164  | 6.403371  |
| H | 2.965704  | 3.543193  | 6.132913  |
| H | 3.039129  | 1.809325  | 5.800385  |
| C | 3.978678  | 2.819432  | -4.189631 |
| H | 4.780022  | 2.616315  | -4.907725 |
| H | 3.040944  | 2.447801  | -4.621456 |
| H | 3.879878  | 3.907513  | -4.093561 |
| C | 6.683191  | -0.354328 | -1.310440 |
| H | 7.057945  | -0.391879 | -0.281825 |
| H | 6.336214  | -1.363371 | -1.568700 |

|    |           |           |           |
|----|-----------|-----------|-----------|
| H  | 7.526107  | -0.118188 | -1.969802 |
| C  | -2.939684 | 3.148934  | -5.098815 |
| H  | -2.410142 | 3.944724  | -5.638990 |
| H  | -2.296482 | 2.263669  | -5.103344 |
| H  | -3.842751 | 2.917131  | -5.677198 |
| C  | -5.574596 | 6.108299  | -1.948060 |
| H  | -5.235148 | 6.839976  | -1.205439 |
| H  | -5.802785 | 6.647869  | -2.873153 |
| H  | -6.515860 | 5.684284  | -1.573180 |
| C  | -3.107768 | 4.432174  | 4.632779  |
| H  | -2.381981 | 3.909766  | 5.270971  |
| H  | -2.643692 | 5.375678  | 4.324587  |
| H  | -3.976432 | 4.669609  | 5.256002  |
| C  | -6.292372 | 1.197106  | 2.377852  |
| H  | -6.661548 | 1.046539  | 3.397813  |
| H  | -7.085630 | 1.704907  | 1.813222  |
| H  | -6.148886 | 0.213003  | 1.918583  |
| Ni | 0.140917  | 0.034991  | -2.083928 |
| C  | 0.223253  | -0.109763 | -3.946618 |
| C  | -0.931809 | -0.459010 | -4.680426 |
| C  | 1.460529  | -0.172949 | -4.624801 |
| C  | -0.848383 | -0.916673 | -5.998745 |
| H  | -1.910273 | -0.383825 | -4.210009 |
| C  | 1.546199  | -0.627126 | -5.944089 |
| H  | 2.367846  | 0.131842  | -4.108283 |
| C  | 0.391955  | -1.004932 | -6.635965 |
| H  | -1.753665 | -1.198459 | -6.533435 |
| H  | 2.514466  | -0.675555 | -6.439032 |
| H  | 0.456680  | -1.348870 | -7.665498 |
| H  | 0.103463  | 1.230902  | -2.928825 |

TS12

|                                  |                     |         |         |
|----------------------------------|---------------------|---------|---------|
| B3LYP SCF energy:                | -1939.83799865 a.u. |         |         |
| B3LYP enthalpy:                  | -1939.022248 a.u.   |         |         |
| B3LYP free energy:               | -1939.155736 a.u.   |         |         |
| M06 SCF energy in solution:      | -3278.24149975 a.u. |         |         |
| M06 enthalpy in solution:        | -3277.425749 a.u.   |         |         |
| M06 free energy in solution:     | -3277.559237 a.u.   |         |         |
| Three lowest frequencies (cm-1): | -599.5447           | 13.7607 | 15.6905 |
| Imaginary frequency:             | -599.5447 cm-1      |         |         |

Cartesian coordinates

| ATOM | X         | Y         | Z         |
|------|-----------|-----------|-----------|
| Ni   | -0.170967 | -0.015705 | -0.336396 |
| C    | -1.986961 | -0.044501 | -0.685984 |
| C    | -2.757321 | 1.141499  | -0.676999 |
| C    | -4.138238 | 1.080388  | -0.565570 |
| H    | -2.279471 | 2.114580  | -0.745492 |
| C    | -4.106521 | -1.229537 | -0.548348 |
| H    | -4.745433 | 1.980288  | -0.533962 |
| H    | -4.689468 | -2.143684 | -0.500995 |
| H    | -0.698866 | -0.030308 | -1.712648 |
| C    | -2.722748 | -1.250828 | -0.660112 |
| H    | -2.217088 | -2.210695 | -0.715279 |

|    |           |           |           |
|----|-----------|-----------|-----------|
| N  | -4.817041 | -0.084177 | -0.494173 |
| N  | 2.512195  | 1.107771  | 0.341069  |
| N  | 2.556034  | -1.041838 | 0.334250  |
| C  | 2.066221  | 2.478529  | 0.241685  |
| C  | 2.167082  | -2.429272 | 0.228098  |
| C  | 1.712250  | 0.016821  | 0.128786  |
| C  | 3.811909  | 0.737073  | 0.663811  |
| C  | 3.839598  | -0.620383 | 0.659404  |
| C  | 2.215972  | 3.149902  | -0.988120 |
| C  | 1.513587  | 3.094944  | 1.382217  |
| C  | 1.643717  | -3.074017 | 1.366716  |
| C  | 2.341971  | -3.087515 | -1.005451 |
| C  | 1.787457  | 4.481645  | -1.052283 |
| C  | 1.098067  | 4.426709  | 1.259264  |
| C  | 1.284326  | -4.421441 | 1.237951  |
| C  | 1.970331  | -4.435951 | -1.075312 |
| C  | 1.233711  | 5.115294  | 0.056799  |
| C  | 1.446290  | -5.097778 | 0.031758  |
| C  | 2.797966  | 2.480721  | -2.229211 |
| C  | 1.335324  | 2.363855  | 2.709621  |
| C  | 1.437610  | -2.357126 | 2.697792  |
| C  | 2.891940  | -2.387577 | -2.244234 |
| H  | 4.582663  | 1.464748  | 0.864308  |
| H  | 4.639457  | -1.317253 | 0.855247  |
| H  | 1.884596  | 5.027224  | -1.986537 |
| H  | 0.661128  | 4.929987  | 2.116783  |
| H  | 0.870590  | -4.946938 | 2.093685  |
| H  | 2.088706  | -4.972491 | -2.012365 |
| H  | 3.090158  | 1.460925  | -1.961491 |
| H  | 1.807055  | 1.380175  | 2.622544  |
| H  | 1.870989  | -1.355555 | 2.615728  |
| H  | 3.141368  | -1.357853 | -1.971252 |
| Al | -6.884021 | -0.056214 | -0.289379 |
| C  | -7.100538 | 0.798898  | 1.507877  |
| H  | -6.663802 | 1.807272  | 1.565867  |
| H  | -8.163808 | 0.911713  | 1.767524  |
| H  | -6.645719 | 0.210316  | 2.318105  |
| C  | -7.371066 | -1.995035 | -0.397229 |
| H  | -8.463011 | -2.108571 | -0.321530 |
| H  | -7.085095 | -2.471579 | -1.346797 |
| H  | -6.950113 | -2.609396 | 0.412872  |
| C  | -7.441269 | 1.067305  | -1.849439 |
| H  | -7.147875 | 0.630806  | -2.815288 |
| H  | -8.535645 | 1.177431  | -1.880718 |
| H  | -7.035064 | 2.089781  | -1.828174 |
| H  | 1.161683  | -6.143651 | -0.045953 |
| H  | 0.905284  | 6.148569  | -0.016455 |
| C  | 2.031001  | 3.097893  | 3.872078  |
| H  | 1.581408  | 4.079367  | 4.060880  |
| H  | 1.942968  | 2.513189  | 4.795081  |
| H  | 3.096453  | 3.252329  | 3.667622  |
| C  | -0.157727 | 2.128491  | 3.014534  |
| H  | -0.274161 | 1.560192  | 3.944891  |
| H  | -0.695575 | 3.076564  | 3.131254  |
| H  | -0.642833 | 1.567243  | 2.207732  |
| C  | 1.741890  | 2.367594  | -3.346325 |

|   |           |           |           |
|---|-----------|-----------|-----------|
| H | 1.402088  | 3.355095  | -3.680073 |
| H | 2.162872  | 1.848226  | -4.215450 |
| H | 0.869525  | 1.804213  | -2.999317 |
| C | 4.064795  | 3.205082  | -2.724852 |
| H | 3.845177  | 4.230060  | -3.045244 |
| H | 4.829398  | 3.258013  | -1.941189 |
| H | 4.494300  | 2.675264  | -3.583073 |
| C | 4.187099  | -3.054545 | -2.747261 |
| H | 4.010967  | -4.086692 | -3.071385 |
| H | 4.589868  | -2.502752 | -3.604549 |
| H | 4.956115  | -3.077479 | -1.966478 |
| C | 1.829137  | -2.313003 | -3.358160 |
| H | 2.225341  | -1.770350 | -4.224721 |
| H | 1.531676  | -3.312118 | -3.697638 |
| H | 0.933961  | -1.790244 | -3.005749 |
| C | 2.160701  | -3.069210 | 3.857098  |
| H | 3.231817  | -3.179297 | 3.653518  |
| H | 2.047831  | -2.493738 | 4.783196  |
| H | 1.750961  | -4.069113 | 4.039707  |
| C | -0.063632 | -2.181205 | 3.002579  |
| H | -0.568993 | -1.635478 | 2.197570  |
| H | -0.563989 | -3.150179 | 3.114186  |
| H | -0.202943 | -1.622244 | 3.935442  |

TS1a

|                                  |                     |         |         |
|----------------------------------|---------------------|---------|---------|
| B3LYP SCF energy:                | -1524.06513100 a.u. |         |         |
| B3LYP enthalpy:                  | -1523.440749 a.u.   |         |         |
| B3LYP free energy:               | -1523.536788 a.u.   |         |         |
| M06 SCF energy in solution:      | -2862.72508931 a.u. |         |         |
| M06 enthalpy in solution:        | -2862.100707 a.u.   |         |         |
| M06 free energy in solution:     | -2862.196746 a.u.   |         |         |
| Three lowest frequencies (cm-1): | -1222.0173          | 17.9715 | 27.3512 |
| Imaginary frequency:             | -1222.0173 cm-1     |         |         |

Cartesian coordinates

| ATOM | X         | Y         | Z         |
|------|-----------|-----------|-----------|
| Ni   | -0.565748 | 1.366268  | -0.565337 |
| P    | -1.549996 | -0.577676 | 0.031039  |
| C    | -1.432381 | -2.032817 | -1.257191 |
| C    | -2.301480 | -1.697048 | -2.489413 |
| C    | 0.015575  | -2.122531 | -1.787971 |
| C    | -1.846027 | -3.419821 | -0.722369 |
| H    | -3.372815 | -1.752582 | -2.288473 |
| H    | -2.071168 | -0.703254 | -2.887482 |
| H    | -2.081677 | -2.428207 | -3.278469 |
| H    | 0.752975  | -2.353786 | -1.020596 |
| H    | 0.059317  | -2.921426 | -2.540956 |
| H    | 0.312509  | -1.189132 | -2.267215 |
| H    | -1.808946 | -4.141662 | -1.549794 |
| H    | -1.165401 | -3.786698 | 0.050308  |
| H    | -2.861068 | -3.439232 | -0.320121 |
| C    | -0.801840 | -1.179291 | 1.719045  |
| C    | -1.686934 | -2.137102 | 2.542578  |
| C    | 0.561305  | -1.863221 | 1.474420  |

|   |           |           |           |
|---|-----------|-----------|-----------|
| C | -0.493574 | 0.082360  | 2.561478  |
| H | -2.620907 | -1.672455 | 2.867297  |
| H | -1.934274 | -3.054146 | 2.001449  |
| H | -1.140808 | -2.430887 | 3.449452  |
| H | 1.228387  | -1.245086 | 0.866867  |
| H | 1.049273  | -2.016339 | 2.446006  |
| H | 0.464974  | -2.846137 | 1.007627  |
| H | -0.020684 | -0.229779 | 3.502653  |
| H | 0.206352  | 0.741253  | 2.037870  |
| H | -1.379380 | 0.664304  | 2.813923  |
| C | -3.435596 | -0.151102 | 0.284845  |
| C | -3.880975 | 0.753951  | -0.892297 |
| C | -4.388986 | -1.358212 | 0.396010  |
| C | -3.603566 | 0.720237  | 1.549535  |
| H | -3.294768 | 1.676949  | -0.914087 |
| H | -3.820773 | 0.268405  | -1.866523 |
| H | -4.932539 | 1.029759  | -0.731970 |
| H | -4.120903 | -2.037896 | 1.209673  |
| H | -5.401103 | -0.985071 | 0.603967  |
| H | -4.450232 | -1.938949 | -0.527857 |
| H | -4.643515 | 1.071661  | 1.582987  |
| H | -3.422040 | 0.174570  | 2.478254  |
| H | -2.962435 | 1.603013  | 1.505348  |
| O | -1.617756 | 3.047062  | 0.056948  |
| C | 1.053422  | 1.316705  | -1.638917 |
| C | 0.594125  | 2.727663  | -1.538869 |
| H | 1.296634  | 3.406682  | -1.046333 |
| H | 0.241800  | 3.138865  | -2.489095 |
| C | -1.233272 | 3.739267  | 1.218844  |
| H | -0.137734 | 3.876613  | 1.295651  |
| H | -1.686556 | 4.743263  | 1.236034  |
| H | -1.552918 | 3.219014  | 2.138281  |
| H | -0.511345 | 3.036381  | -0.795493 |
| C | 2.279844  | 0.854638  | -0.952670 |
| C | 3.063740  | -0.173888 | -1.500218 |
| C | 2.723548  | 1.407502  | 0.270084  |
| C | 4.219883  | -0.647552 | -0.873934 |
| H | 2.770552  | -0.613434 | -2.450657 |
| C | 3.871080  | 0.952662  | 0.903118  |
| H | 2.153480  | 2.208879  | 0.732706  |
| C | 4.630873  | -0.084130 | 0.338569  |
| H | 4.790191  | -1.441213 | -1.343755 |
| H | 4.203346  | 1.385190  | 1.842138  |
| H | 0.911255  | 0.855696  | -2.617330 |
| O | 5.740142  | -0.462473 | 1.042500  |
| C | 6.548663  | -1.495902 | 0.508568  |
| H | 7.365925  | -1.636666 | 1.218724  |
| H | 5.990531  | -2.437011 | 0.408426  |
| H | 6.963724  | -1.220754 | -0.470630 |

TS2a

|                    |                     |
|--------------------|---------------------|
| B3LYP SCF energy:  | -1524.05704383 a.u. |
| B3LYP enthalpy:    | -1523.432774 a.u.   |
| B3LYP free energy: | -1523.529391 a.u.   |

M06 SCF energy in solution: -2862.71757955 a.u.  
M06 enthalpy in solution: -2862.093310 a.u.  
M06 free energy in solution: -2862.189927 a.u.  
Three lowest frequencies (cm-1): -1217.9133 14.8461 22.3091  
Imaginary frequency: -1217.9133 cm-1

Cartesian coordinates

| ATOM | X         | Y         | Z         |
|------|-----------|-----------|-----------|
| Ni   | 0.168491  | 0.697971  | -0.487950 |
| P    | 2.141434  | -0.235318 | 0.017425  |
| C    | 3.237782  | 1.182296  | 0.773594  |
| C    | 3.160551  | 2.397979  | -0.184053 |
| C    | 2.593625  | 1.646160  | 2.100850  |
| C    | 4.719590  | 0.844564  | 1.030905  |
| H    | 3.667652  | 2.234890  | -1.135085 |
| H    | 2.123449  | 2.675247  | -0.392235 |
| H    | 3.645697  | 3.255386  | 0.301367  |
| H    | 2.733664  | 0.925499  | 2.910310  |
| H    | 3.086639  | 2.575974  | 2.414404  |
| H    | 1.524520  | 1.849237  | 1.981977  |
| H    | 5.197971  | 1.709222  | 1.510986  |
| H    | 4.850058  | -0.010680 | 1.699061  |
| H    | 5.274069  | 0.645261  | 0.109954  |
| C    | 1.769216  | -1.554074 | 1.398221  |
| C    | 2.961163  | -1.920195 | 2.306584  |
| C    | 0.613686  | -1.013622 | 2.276491  |
| C    | 1.233993  | -2.852901 | 0.754380  |
| H    | 3.815557  | -2.311660 | 1.748580  |
| H    | 3.304232  | -1.074128 | 2.906436  |
| H    | 2.642973  | -2.703040 | 3.008473  |
| H    | -0.282632 | -0.809471 | 1.682802  |
| H    | 0.358530  | -1.778713 | 3.022356  |
| H    | 0.861464  | -0.098554 | 2.811508  |
| H    | 0.857631  | -3.503525 | 1.554473  |
| H    | 0.402017  | -2.657829 | 0.070430  |
| H    | 2.002223  | -3.415598 | 0.219401  |
| C    | 3.147026  | -1.095217 | -1.408568 |
| C    | 3.740864  | -0.018092 | -2.343614 |
| C    | 4.293684  | -2.014576 | -0.936373 |
| C    | 2.181644  | -1.921135 | -2.290351 |
| H    | 2.980867  | 0.695717  | -2.677480 |
| H    | 4.566174  | 0.534150  | -1.889418 |
| H    | 4.139450  | -0.517148 | -3.236599 |
| H    | 3.929235  | -2.892372 | -0.397345 |
| H    | 4.835408  | -2.382732 | -1.818274 |
| H    | 5.018296  | -1.501053 | -0.300461 |
| H    | 2.763326  | -2.383331 | -3.099447 |
| H    | 1.676037  | -2.723904 | -1.754328 |
| H    | 1.420369  | -1.284605 | -2.743245 |
| C    | -0.691155 | -0.025853 | -2.013758 |
| C    | -1.679753 | 0.903233  | -1.407890 |
| H    | -0.227761 | 0.304587  | -2.946043 |
| H    | -1.854735 | 1.799970  | -2.012740 |
| H    | -0.943141 | -1.087009 | -2.024257 |
| C    | -2.960419 | 0.350123  | -0.841613 |
| C    | -4.166222 | 1.035169  | -1.016798 |



|   |           |           |           |
|---|-----------|-----------|-----------|
| C | -3.000332 | -0.850174 | -0.109475 |
| C | -5.374556 | 0.553579  | -0.502417 |
| H | -4.172568 | 1.969265  | -1.574751 |
| C | -4.190252 | -1.346329 | 0.405573  |
| H | -2.080692 | -1.403360 | 0.061817  |
| C | -5.390934 | -0.646932 | 0.213447  |
| H | -6.284357 | 1.119442  | -0.669193 |
| H | -4.215588 | -2.273549 | 0.970187  |
| O | -0.518190 | 2.081854  | 0.853167  |
| H | -1.229842 | 1.568149  | -0.275110 |
| C | -0.403717 | 3.468420  | 0.656535  |
| H | -1.149379 | 4.005615  | 1.264512  |
| H | 0.590219  | 3.846382  | 0.951439  |
| H | -0.561612 | 3.772644  | -0.396015 |
| O | -6.507707 | -1.216659 | 0.761949  |
| C | -7.741229 | -0.536900 | 0.614941  |
| H | -8.486302 | -1.149721 | 1.126502  |
| H | -7.712919 | 0.459271  | 1.077366  |
| H | -8.023790 | -0.432026 | -0.441699 |

TS1b

|                                  |                     |         |         |
|----------------------------------|---------------------|---------|---------|
| B3LYP SCF energy:                | -1637.42282105 a.u. |         |         |
| B3LYP enthalpy:                  | -1636.785645 a.u.   |         |         |
| B3LYP free energy:               | -1636.885949 a.u.   |         |         |
| M06 SCF energy in solution:      | -2976.07465087 a.u. |         |         |
| M06 enthalpy in solution:        | -2975.437475 a.u.   |         |         |
| M06 free energy in solution:     | -2975.537779 a.u.   |         |         |
| Three lowest frequencies (cm-1): | -1227.2534          | 18.1346 | 24.2842 |
| Imaginary frequency:             | -1227.2534 cm-1     |         |         |

Cartesian coordinates

| ATOM | X         | Y         | Z         |
|------|-----------|-----------|-----------|
| Ni   | -1.121726 | 1.390739  | -0.546977 |
| P    | -1.911609 | -0.644082 | 0.056238  |
| C    | -1.829624 | -2.030766 | -1.306233 |
| C    | -2.849051 | -1.726809 | -2.427447 |
| C    | -0.444755 | -1.981907 | -1.989086 |
| C    | -2.076990 | -3.464773 | -0.792021 |
| H    | -3.885852 | -1.883747 | -2.123515 |
| H    | -2.745445 | -0.703766 | -2.803966 |
| H    | -2.652231 | -2.407597 | -3.266014 |
| H    | 0.390557  | -2.147103 | -1.310213 |
| H    | -0.408247 | -2.766809 | -2.756678 |
| H    | -0.291669 | -1.021131 | -2.482348 |
| H    | -2.069895 | -4.151762 | -1.649165 |
| H    | -1.295008 | -3.802043 | -0.107437 |
| H    | -3.040620 | -3.580039 | -0.291532 |
| C    | -0.943777 | -1.253601 | 1.627556  |
| C    | -1.672900 | -2.298738 | 2.497205  |
| C    | 0.426637  | -1.836733 | 1.216337  |
| C    | -0.631017 | -0.004363 | 2.486519  |
| H    | -2.598072 | -1.914309 | 2.932584  |
| H    | -1.910213 | -3.213646 | 1.947928  |
| H    | -1.017677 | -2.581463 | 3.332389  |

|   |           |           |           |
|---|-----------|-----------|-----------|
| H | 0.993397  | -1.151878 | 0.579510  |
| H | 1.017483  | -2.000090 | 2.127072  |
| H | 0.343842  | -2.801880 | 0.711393  |
| H | -0.036777 | -0.315865 | 3.355891  |
| H | -0.039266 | 0.723532  | 1.921873  |
| H | -1.522172 | 0.500089  | 2.859320  |
| C | -3.782987 | -0.370059 | 0.522699  |
| C | -4.413765 | 0.539692  | -0.562484 |
| C | -4.629641 | -1.649542 | 0.674537  |
| C | -3.878583 | 0.438656  | 1.835231  |
| H | -3.900556 | 1.504384  | -0.606722 |
| H | -4.423682 | 0.092274  | -1.556454 |
| H | -5.459007 | 0.730863  | -0.282548 |
| H | -4.231371 | -2.337687 | 1.424912  |
| H | -5.638826 | -1.362344 | 0.999267  |
| H | -4.743566 | -2.196955 | -0.264483 |
| H | -4.932499 | 0.702502  | 1.994654  |
| H | -3.553542 | -0.121033 | 2.715093  |
| H | -3.316679 | 1.371838  | 1.762296  |
| O | -2.237609 | 2.945425  | 0.216056  |
| C | 0.409944  | 1.499467  | -1.750833 |
| C | -0.141498 | 2.866182  | -1.555573 |
| H | 0.544572  | 3.580216  | -1.090623 |
| H | -0.596529 | 3.282095  | -2.458847 |
| C | -1.812615 | 3.629885  | 1.370780  |
| H | -0.731569 | 3.863867  | 1.358769  |
| H | -2.350701 | 4.585903  | 1.465029  |
| H | -2.002975 | 3.051550  | 2.290502  |
| H | -1.203984 | 3.063051  | -0.720666 |
| C | 1.703813  | 1.102712  | -1.164854 |
| C | 2.494850  | 0.115482  | -1.790238 |
| C | 2.204369  | 1.672384  | 0.028051  |
| C | 3.710179  | -0.294361 | -1.253703 |
| H | 2.148735  | -0.325881 | -2.721229 |
| C | 3.418577  | 1.269120  | 0.565899  |
| H | 1.626322  | 2.437359  | 0.538912  |
| C | 4.186588  | 0.277416  | -0.064512 |
| H | 4.300613  | -1.052144 | -1.757121 |
| H | 3.795543  | 1.711176  | 1.482722  |
| H | 0.225734  | 1.061292  | -2.731861 |
| C | 5.473808  | -0.116366 | 0.559544  |
| O | 5.917235  | 0.351939  | 1.591999  |
| O | 6.123859  | -1.073971 | -0.148794 |
| C | 7.377734  | -1.494464 | 0.403628  |
| H | 7.238073  | -1.915737 | 1.403193  |
| H | 7.760388  | -2.252387 | -0.281230 |
| H | 8.072195  | -0.652382 | 0.471025  |

TS2b

|                             |                     |
|-----------------------------|---------------------|
| B3LYP SCF energy:           | -1637.41467830 a.u. |
| B3LYP enthalpy:             | -1636.778013 a.u.   |
| B3LYP free energy:          | -1636.879455 a.u.   |
| M06 SCF energy in solution: | -2976.06646751 a.u. |
| M06 enthalpy in solution:   | -2975.429802 a.u.   |

M06 free energy in solution: -2975.531244 a.u.  
Three lowest frequencies (cm-1): -1204.1891 19.5303 20.2549  
Imaginary frequency: -1204.1891 cm-1

Cartesian coordinates

| ATOM | X         | Y         | Z         |
|------|-----------|-----------|-----------|
| Ni   | -0.700463 | 0.822256  | 0.413004  |
| P    | -2.589835 | -0.296567 | -0.016341 |
| C    | -3.760962 | 0.952388  | -0.938855 |
| C    | -3.774740 | 2.271431  | -0.127261 |
| C    | -3.131908 | 1.300453  | -2.308208 |
| C    | -5.214001 | 0.489768  | -1.162717 |
| H    | -4.268329 | 2.179602  | 0.840448  |
| H    | -2.761549 | 2.647370  | 0.039304  |
| H    | -4.322415 | 3.029615  | -0.702698 |
| H    | -3.217854 | 0.485121  | -3.030647 |
| H    | -3.678675 | 2.155081  | -2.728609 |
| H    | -2.079012 | 1.583439  | -2.212560 |
| H    | -5.739523 | 1.255113  | -1.749856 |
| H    | -5.277792 | -0.447808 | -1.720566 |
| H    | -5.767126 | 0.369310  | -0.227477 |
| C    | -2.098784 | -1.728937 | -1.239708 |
| C    | -3.245128 | -2.281096 | -2.111195 |
| C    | -0.970973 | -1.206337 | -2.162386 |
| C    | -1.482508 | -2.900415 | -0.443437 |
| H    | -4.079777 | -2.669575 | -1.522252 |
| H    | -3.636860 | -1.535261 | -2.806931 |
| H    | -2.858527 | -3.112049 | -2.716635 |
| H    | -0.111822 | -0.848502 | -1.587300 |
| H    | -0.631495 | -2.035715 | -2.797329 |
| H    | -1.282162 | -0.394097 | -2.817263 |
| H    | -1.035981 | -3.606270 | -1.155581 |
| H    | -0.686014 | -2.562574 | 0.227226  |
| H    | -2.218536 | -3.457455 | 0.140680  |
| C    | -3.558660 | -1.059380 | 1.487174  |
| C    | -4.229407 | 0.072474  | 2.297736  |
| C    | -4.640312 | -2.091064 | 1.103126  |
| C    | -2.560411 | -1.729301 | 2.460841  |
| H    | -3.521339 | 0.866961  | 2.554764  |
| H    | -5.084995 | 0.516934  | 1.784600  |
| H    | -4.604116 | -0.351313 | 3.238534  |
| H    | -4.215020 | -2.996432 | 0.662941  |
| H    | -5.174016 | -2.397978 | 2.012843  |
| H    | -5.383107 | -1.691232 | 0.409063  |
| H    | -3.126114 | -2.121921 | 3.316333  |
| H    | -2.014304 | -2.564572 | 2.023955  |
| H    | -1.832941 | -1.009948 | 2.839028  |
| C    | 0.136700  | 0.356344  | 2.043960  |
| C    | 1.094663  | 1.270967  | 1.358473  |
| H    | -0.375013 | 0.770283  | 2.915521  |
| H    | 1.192909  | 2.242118  | 1.855444  |
| H    | 0.458665  | -0.673871 | 2.199934  |
| C    | 2.426082  | 0.726952  | 0.923690  |
| C    | 3.584820  | 1.506626  | 1.067012  |
| C    | 2.557538  | -0.551617 | 0.353660  |
| C    | 4.831373  | 1.029957  | 0.670923  |

|   |           |           |           |
|---|-----------|-----------|-----------|
| H | 3.506514  | 2.500667  | 1.501356  |
| C | 3.798320  | -1.035440 | -0.041022 |
| H | 1.674625  | -1.169555 | 0.217107  |
| C | 4.950226  | -0.250405 | 0.113595  |
| H | 5.715401  | 1.645752  | 0.794330  |
| H | 3.898878  | -2.023373 | -0.478906 |
| O | -0.049690 | 2.061757  | -1.070781 |
| H | 0.658612  | 1.751546  | 0.141030  |
| C | -0.262161 | 3.451043  | -1.069668 |
| H | 0.474537  | 3.952042  | -1.717756 |
| H | -1.263573 | 3.715005  | -1.450029 |
| H | -0.172630 | 3.904104  | -0.063683 |
| C | 6.249506  | -0.819562 | -0.327124 |
| O | 6.393454  | -1.926545 | -0.812095 |
| O | 7.284998  | 0.034052  | -0.130819 |
| C | 8.567277  | -0.460361 | -0.537562 |
| H | 8.571615  | -0.689709 | -1.606843 |
| H | 9.274137  | 0.339981  | -0.314747 |
| H | 8.825847  | -1.366538 | 0.017503  |

TS3a

|                                  |                     |        |         |
|----------------------------------|---------------------|--------|---------|
| B3LYP SCF energy:                | -2064.82615063 a.u. |        |         |
| B3LYP enthalpy:                  | -2063.963598 a.u.   |        |         |
| B3LYP free energy:               | -2064.085528 a.u.   |        |         |
| M06 SCF energy in solution:      | -3403.25979221 a.u. |        |         |
| M06 enthalpy in solution:        | -3402.397240 a.u.   |        |         |
| M06 free energy in solution:     | -3402.519170 a.u.   |        |         |
| Three lowest frequencies (cm-1): | -500.3584           | 9.4153 | 13.7930 |
| Imaginary frequency:             | -500.3584 cm-1      |        |         |

Cartesian coordinates

| ATOM | X         | Y         | Z         |
|------|-----------|-----------|-----------|
| Ni   | -0.004141 | -0.191051 | -1.777244 |
| C    | 1.882794  | -0.530942 | -1.783824 |
| O    | 2.352079  | -1.575245 | -2.209379 |
| C    | -2.408525 | 1.701682  | -1.590608 |
| C    | -1.623619 | 2.869270  | -1.464027 |
| C    | -2.086109 | 3.986504  | -0.782464 |
| C    | -3.358716 | 3.982797  | -0.189590 |
| C    | -4.153324 | 2.835492  | -0.290292 |
| C    | -3.674326 | 1.720070  | -0.983196 |
| H    | -0.631795 | 2.897841  | -1.906420 |
| H    | -1.477163 | 4.881206  | -0.694391 |
| H    | -5.143430 | 2.799879  | 0.150300  |
| H    | -4.317643 | 0.847744  | -1.069872 |
| C    | 2.817107  | 0.550651  | -1.212573 |
| H    | 2.715032  | 1.432978  | -1.860675 |
| H    | 2.434570  | 0.867316  | -0.233085 |
| C    | 4.294229  | 0.123317  | -1.108910 |
| H    | 4.363297  | -0.765417 | -0.470330 |
| H    | 4.637860  | -0.189233 | -2.100921 |
| C    | 5.175315  | 1.224789  | -0.564106 |
| C    | 5.766821  | 2.165458  | -1.420201 |
| C    | 5.398463  | 1.355195  | 0.814450  |

|   |           |           |           |
|---|-----------|-----------|-----------|
| C | 6.550702  | 3.204735  | -0.916948 |
| H | 5.614229  | 2.076659  | -2.494031 |
| C | 6.181519  | 2.392260  | 1.323822  |
| H | 4.957083  | 0.629594  | 1.495255  |
| C | 6.760605  | 3.322907  | 0.458698  |
| H | 7.002659  | 3.919586  | -1.600171 |
| H | 6.344064  | 2.470195  | 2.396052  |
| H | 7.373635  | 4.129519  | 0.852138  |
| C | -1.049769 | 0.612603  | -3.423919 |
| H | -1.034477 | -0.179339 | -4.168935 |
| H | -0.751942 | 1.586899  | -3.803226 |
| H | 0.645589  | 0.410417  | -2.995911 |
| P | -0.507247 | -1.280899 | 0.166135  |
| C | -1.071709 | -0.017728 | 1.456179  |
| C | -1.620273 | -0.471312 | 2.830378  |
| C | 0.013507  | 1.065703  | 1.656310  |
| H | -1.901255 | 0.469402  | 0.923605  |
| C | -2.205165 | 0.732470  | 3.592243  |
| H | -0.821088 | -0.901910 | 3.440178  |
| H | -2.378560 | -1.253639 | 2.726875  |
| C | -0.519251 | 2.257294  | 2.471499  |
| H | 0.881419  | 0.628652  | 2.171981  |
| H | 0.367887  | 1.420067  | 0.682165  |
| C | -1.140090 | 1.817958  | 3.805375  |
| H | -2.608974 | 0.398758  | 4.557105  |
| H | -3.048348 | 1.151696  | 3.023888  |
| H | 0.293119  | 2.974232  | 2.647433  |
| H | -1.275781 | 2.782445  | 1.873067  |
| H | -1.573118 | 2.682805  | 4.324134  |
| H | -0.352380 | 1.421250  | 4.463462  |
| C | 0.979677  | -2.236382 | 0.873413  |
| C | 0.984372  | -2.576102 | 2.378550  |
| C | 1.278623  | -3.510512 | 0.048324  |
| H | 1.810079  | -1.539624 | 0.695138  |
| C | 2.297795  | -3.263713 | 2.803561  |
| H | 0.132976  | -3.229185 | 2.619763  |
| H | 0.869263  | -1.669736 | 2.976998  |
| C | 2.607413  | -4.159694 | 0.467178  |
| H | 0.473495  | -4.240074 | 0.211470  |
| H | 1.311823  | -3.273160 | -1.017376 |
| C | 2.614529  | -4.504354 | 1.961047  |
| H | 2.243367  | -3.523030 | 3.868996  |
| H | 3.121620  | -2.541519 | 2.701865  |
| H | 2.779154  | -5.060029 | -0.136302 |
| H | 3.431503  | -3.469715 | 0.236969  |
| H | 3.583017  | -4.926909 | 2.257841  |
| H | 1.860085  | -5.280973 | 2.157897  |
| C | -1.890190 | -2.577079 | 0.040087  |
| C | -3.322933 | -2.012694 | 0.178177  |
| C | -1.799934 | -3.351723 | -1.299735 |
| H | -1.725539 | -3.286711 | 0.865414  |
| C | -4.377297 | -3.132721 | 0.115590  |
| H | -3.509690 | -1.302718 | -0.635952 |
| H | -3.450306 | -1.453371 | 1.107454  |
| C | -2.845588 | -4.476980 | -1.378836 |
| H | -1.962690 | -2.642787 | -2.123274 |

|   |           |           |           |
|---|-----------|-----------|-----------|
| H | -0.803014 | -3.767993 | -1.454201 |
| C | -4.270912 | -3.945294 | -1.181520 |
| H | -5.380365 | -2.697453 | 0.213615  |
| H | -4.242823 | -3.802598 | 0.977965  |
| H | -2.759209 | -4.990310 | -2.345000 |
| H | -2.626750 | -5.229365 | -0.606341 |
| H | -4.992950 | -4.771716 | -1.176173 |
| H | -4.537239 | -3.301917 | -2.033329 |
| C | -1.956543 | 0.523015  | -2.354512 |
| H | -2.616004 | -0.339050 | -2.332488 |
| O | -3.722072 | 5.134097  | 0.451645  |
| C | -5.002366 | 5.186576  | 1.055623  |
| H | -5.108700 | 4.432051  | 1.847296  |
| H | -5.087461 | 6.182325  | 1.495116  |
| H | -5.804522 | 5.046944  | 0.318210  |

TS4a

|                                               |                            |        |         |
|-----------------------------------------------|----------------------------|--------|---------|
| B3LYP SCF energy:                             | -2064.82279354 a.u.        |        |         |
| B3LYP enthalpy:                               | -2063.960396 a.u.          |        |         |
| B3LYP free energy:                            | -2064.083307 a.u.          |        |         |
| M06 SCF energy in solution:                   | -3403.25267834 a.u.        |        |         |
| M06 enthalpy in solution:                     | -3402.390281 a.u.          |        |         |
| M06 free energy in solution:                  | -3402.513192 a.u.          |        |         |
| Three lowest frequencies (cm <sup>-1</sup> ): | -585.3294                  | 8.3138 | 13.5026 |
| Imaginary frequency:                          | -585.3294 cm <sup>-1</sup> |        |         |

Cartesian coordinates

| ATOM | X         | Y         | Z         |
|------|-----------|-----------|-----------|
| Ni   | -0.710883 | 0.140495  | 0.481554  |
| C    | 0.162006  | 1.446231  | -0.612309 |
| O    | -0.159620 | 1.524598  | -1.791332 |
| C    | 1.225739  | 2.405477  | -0.054152 |
| H    | 0.695942  | 3.079069  | 0.636160  |
| H    | 1.923590  | 1.840172  | 0.578684  |
| C    | 1.980979  | 3.215123  | -1.126044 |
| H    | 2.503284  | 2.520049  | -1.795272 |
| H    | 1.245040  | 3.736669  | -1.747000 |
| C    | 2.965700  | 4.195852  | -0.531288 |
| C    | 2.569365  | 5.497235  | -0.188895 |
| C    | 4.295152  | 3.824951  | -0.281946 |
| C    | 3.468073  | 6.396637  | 0.386383  |
| H    | 1.544825  | 5.808647  | -0.382752 |
| C    | 5.198812  | 4.719823  | 0.293281  |
| H    | 4.626726  | 2.823532  | -0.550625 |
| C    | 4.788016  | 6.011017  | 0.630714  |
| H    | 3.138808  | 7.401783  | 0.638190  |
| H    | 6.225840  | 4.410562  | 0.471840  |
| H    | 5.490640  | 6.711421  | 1.074558  |
| C    | -2.447455 | 0.534905  | 1.704568  |
| H    | -1.324471 | 1.471395  | 0.876058  |
| P    | 0.621153  | -1.627866 | 0.024224  |
| C    | 1.434156  | -2.094490 | 1.667888  |
| C    | 2.340903  | -3.341905 | 1.783687  |
| C    | 2.141055  | -0.875236 | 2.302780  |

|   |           |           |           |
|---|-----------|-----------|-----------|
| H | 0.544301  | -2.291923 | 2.283547  |
| C | 2.661931  | -3.632080 | 3.261482  |
| H | 3.285513  | -3.174823 | 1.258854  |
| H | 1.883096  | -4.220573 | 1.318066  |
| C | 2.514718  | -1.149413 | 3.770288  |
| H | 3.052054  | -0.638160 | 1.733294  |
| H | 1.492674  | 0.006746  | 2.241479  |
| C | 3.349193  | -2.429474 | 3.925894  |
| H | 3.300348  | -4.522062 | 3.333794  |
| H | 1.732333  | -3.869489 | 3.800043  |
| H | 3.056803  | -0.288532 | 4.181856  |
| H | 1.590219  | -1.246420 | 4.358747  |
| H | 3.535437  | -2.634279 | 4.987797  |
| H | 4.334324  | -2.278466 | 3.459834  |
| C | 1.984449  | -1.253407 | -1.244935 |
| C | 3.253008  | -2.132486 | -1.253642 |
| C | 1.404614  | -1.154352 | -2.676761 |
| H | 2.291852  | -0.239548 | -0.951726 |
| C | 4.287980  | -1.624643 | -2.277341 |
| H | 2.989112  | -3.174585 | -1.486254 |
| H | 3.724556  | -2.135867 | -0.268283 |
| C | 2.444154  | -0.617671 | -3.673525 |
| H | 1.100215  | -2.156582 | -3.008104 |
| H | 0.520244  | -0.512020 | -2.685467 |
| C | 3.704500  | -1.490892 | -3.688928 |
| H | 5.156883  | -2.295720 | -2.279913 |
| H | 4.655572  | -0.641577 | -1.947070 |
| H | 1.997739  | -0.568343 | -4.674680 |
| H | 2.708255  | 0.413918  | -3.400325 |
| H | 4.456389  | -1.075497 | -4.372078 |
| H | 3.449025  | -2.489662 | -4.073963 |
| C | -0.217968 | -3.213742 | -0.590261 |
| C | -0.847188 | -4.079298 | 0.528599  |
| C | -1.317977 | -2.895542 | -1.634199 |
| H | 0.565227  | -3.812114 | -1.080989 |
| C | -1.459048 | -5.372704 | -0.040680 |
| H | -1.634399 | -3.504989 | 1.032291  |
| H | -0.115202 | -4.342627 | 1.296157  |
| C | -1.941269 | -4.177232 | -2.213801 |
| H | -2.098415 | -2.299297 | -1.143221 |
| H | -0.932411 | -2.277988 | -2.447496 |
| C | -2.514667 | -5.080693 | -1.114744 |
| H | -1.896659 | -5.960458 | 0.776621  |
| H | -0.657515 | -5.989453 | -0.474280 |
| H | -2.723525 | -3.909671 | -2.935539 |
| H | -1.174031 | -4.729268 | -2.777170 |
| H | -2.892112 | -6.017200 | -1.544773 |
| H | -3.376155 | -4.580764 | -0.647833 |
| C | -2.069982 | -0.830269 | 1.661862  |
| H | -2.682446 | -1.521109 | 1.089821  |
| H | -1.567773 | -1.257211 | 2.527139  |
| H | -2.188957 | 1.083835  | 2.609276  |
| C | -3.666168 | 1.057971  | 1.021341  |
| C | -4.474527 | 1.995123  | 1.670740  |
| C | -4.060892 | 0.626500  | -0.258094 |
| C | -5.650167 | 2.482081  | 1.091359  |

|   |           |           |           |
|---|-----------|-----------|-----------|
| H | -4.191010 | 2.353649  | 2.658035  |
| C | -5.222889 | 1.100086  | -0.848475 |
| H | -3.432768 | -0.070960 | -0.805421 |
| C | -6.031066 | 2.031349  | -0.176358 |
| H | -6.249298 | 3.205043  | 1.633189  |
| H | -5.522546 | 0.775332  | -1.840071 |
| O | -7.151836 | 2.435438  | -0.843870 |
| C | -7.989122 | 3.396500  | -0.224584 |
| H | -7.454674 | 4.337564  | -0.036934 |
| H | -8.805871 | 3.579930  | -0.925396 |
| H | -8.402256 | 3.023764  | 0.722628  |

TS3b

|                                               |                            |        |        |
|-----------------------------------------------|----------------------------|--------|--------|
| B3LYP SCF energy:                             | -2178.18373457 a.u.        |        |        |
| B3LYP enthalpy:                               | -2177.308526 a.u.          |        |        |
| B3LYP free energy:                            | -2177.435657 a.u.          |        |        |
| M06 SCF energy in solution:                   | -3516.60920109 a.u.        |        |        |
| M06 enthalpy in solution:                     | -3515.733993 a.u.          |        |        |
| M06 free energy in solution:                  | -3515.861124 a.u.          |        |        |
| Three lowest frequencies (cm <sup>-1</sup> ): | -469.6618                  | 8.9274 | 9.4398 |
| Imaginary frequency:                          | -469.6618 cm <sup>-1</sup> |        |        |

Cartesian coordinates

| ATOM | X         | Y         | Z         |
|------|-----------|-----------|-----------|
| Ni   | 0.406601  | -0.375826 | -1.799034 |
| C    | 2.273531  | 0.055681  | -1.760801 |
| O    | 3.113543  | -0.742075 | -2.141759 |
| C    | -2.573177 | 0.351100  | -1.794413 |
| C    | -2.366284 | 1.747942  | -1.743353 |
| C    | -3.288720 | 2.589197  | -1.136165 |
| C    | -4.453651 | 2.071351  | -0.547942 |
| C    | -4.669691 | 0.685258  | -0.580274 |
| C    | -3.744501 | -0.153826 | -1.190891 |
| H    | -1.469302 | 2.174341  | -2.182660 |
| H    | -3.125957 | 3.661813  | -1.104655 |
| H    | -5.568604 | 0.273148  | -0.134920 |
| H    | -3.938461 | -1.222907 | -1.225347 |
| C    | 2.697091  | 1.422278  | -1.199660 |
| H    | 2.330585  | 2.178334  | -1.909034 |
| H    | 2.149157  | 1.612778  | -0.267159 |
| C    | 4.216538  | 1.571745  | -0.989795 |
| H    | 4.554182  | 0.815981  | -0.270319 |
| H    | 4.720656  | 1.338172  | -1.933699 |
| C    | 4.602025  | 2.952998  | -0.509734 |
| C    | 4.841033  | 3.990594  | -1.422883 |
| C    | 4.703772  | 3.240623  | 0.858789  |
| C    | 5.167201  | 5.274556  | -0.984289 |
| H    | 4.776993  | 3.785401  | -2.489711 |
| C    | 5.029975  | 4.522949  | 1.303636  |
| H    | 4.532076  | 2.446910  | 1.583577  |
| C    | 5.262411  | 5.546044  | 0.382431  |
| H    | 5.353119  | 6.062041  | -1.710371 |
| H    | 5.107905  | 4.721420  | 2.369717  |
| H    | 5.520080  | 6.544407  | 0.725856  |



|   |           |           |           |
|---|-----------|-----------|-----------|
| C | -0.783888 | -0.143505 | -3.505243 |
| H | -0.398868 | -0.884947 | -4.201261 |
| H | -0.878548 | 0.854633  | -3.923610 |
| H | 0.875658  | 0.415609  | -2.988314 |
| P | 0.328012  | -1.503171 | 0.196847  |
| C | -0.817345 | -0.583453 | 1.388016  |
| C | -1.194566 | -1.187793 | 2.761783  |
| C | -0.341691 | 0.877825  | 1.566955  |
| H | -1.741977 | -0.536319 | 0.795336  |
| C | -2.299216 | -0.346441 | 3.427976  |
| H | -0.328512 | -1.199683 | 3.429055  |
| H | -1.520698 | -2.228522 | 2.669050  |
| C | -1.404080 | 1.730494  | 2.282924  |
| H | 0.592741  | 0.895544  | 2.147165  |
| H | -0.116540 | 1.318837  | 0.588857  |
| C | -1.846170 | 1.108888  | 3.615527  |
| H | -2.567239 | -0.790499 | 4.395484  |
| H | -3.206457 | -0.372152 | 2.806771  |
| H | -1.014345 | 2.743488  | 2.445353  |
| H | -2.275843 | 1.832904  | 1.623349  |
| H | -2.652058 | 1.705632  | 4.061077  |
| H | -1.007909 | 1.134246  | 4.328048  |
| C | 2.035414  | -1.683275 | 1.025591  |
| C | 2.073248  | -1.899937 | 2.552594  |
| C | 2.906408  | -2.751726 | 0.321737  |
| H | 2.497750  | -0.707352 | 0.824087  |
| C | 3.516418  | -1.942269 | 3.092002  |
| H | 1.557794  | -2.836149 | 2.811671  |
| H | 1.544069  | -1.093469 | 3.064448  |
| C | 4.347640  | -2.755873 | 0.857552  |
| H | 2.471579  | -3.745095 | 0.499614  |
| H | 2.921248  | -2.578950 | -0.756566 |
| C | 4.382779  | -2.982209 | 2.373197  |
| H | 3.493718  | -2.136548 | 4.172203  |
| H | 3.970367  | -0.948001 | 2.965212  |
| H | 4.925286  | -3.531225 | 0.338587  |
| H | 4.826210  | -1.796867 | 0.612832  |
| H | 5.413585  | -2.942967 | 2.747705  |
| H | 4.005107  | -3.990913 | 2.598667  |
| C | -0.331310 | -3.277476 | 0.067795  |
| C | -1.871144 | -3.403284 | 0.119384  |
| C | 0.167076  | -3.953764 | -1.234417 |
| H | 0.081248  | -3.827493 | 0.927135  |
| C | -2.316407 | -4.875973 | 0.058340  |
| H | -2.302749 | -2.864417 | -0.732362 |
| H | -2.286112 | -2.941119 | 1.017647  |
| C | -0.264041 | -5.428081 | -1.310809 |
| H | -0.249244 | -3.404673 | -2.090349 |
| H | 1.251921  | -3.884006 | -1.332097 |
| C | -1.786036 | -5.583414 | -1.195658 |
| H | -3.412301 | -4.928842 | 0.093123  |
| H | -1.951135 | -5.398493 | 0.954949  |
| H | 0.095298  | -5.867080 | -2.250192 |
| H | 0.222955  | -5.989083 | -0.499146 |
| H | -2.064613 | -6.644749 | -1.182169 |
| H | -2.262548 | -5.146366 | -2.085769 |

|   |           |           |           |
|---|-----------|-----------|-----------|
| C | -1.640227 | -0.560310 | -2.472695 |
| H | -1.886837 | -1.616560 | -2.422296 |
| C | -5.406044 | 3.021815  | 0.078254  |
| O | -5.253706 | 4.228578  | 0.122603  |
| O | -6.488762 | 2.399525  | 0.608594  |
| C | -7.449802 | 3.268208  | 1.222535  |
| H | -8.240626 | 2.614942  | 1.593519  |
| H | -6.995425 | 3.827156  | 2.045350  |
| H | -7.849396 | 3.978549  | 0.493349  |

TS4b

|                                               |                            |        |         |
|-----------------------------------------------|----------------------------|--------|---------|
| B3LYP SCF energy:                             | -2178.17865959 a.u.        |        |         |
| B3LYP enthalpy:                               | -2177.304108 a.u.          |        |         |
| B3LYP free energy:                            | -2177.432652 a.u.          |        |         |
| M06 SCF energy in solution:                   | -3516.60058252 a.u.        |        |         |
| M06 enthalpy in solution:                     | -3515.726031 a.u.          |        |         |
| M06 free energy in solution:                  | -3515.854575 a.u.          |        |         |
| Three lowest frequencies (cm <sup>-1</sup> ): | -561.4415                  | 9.7390 | 11.5277 |
| Imaginary frequency:                          | -561.4415 cm <sup>-1</sup> |        |         |

Cartesian coordinates

| ATOM | X         | Y         | Z         |
|------|-----------|-----------|-----------|
| Ni   | 0.318096  | -0.006685 | -0.584144 |
| C    | -0.273802 | 1.433482  | 0.534330  |
| O    | 0.133455  | 1.479744  | 1.687052  |
| C    | -1.223384 | 2.523960  | 0.018178  |
| H    | -0.664074 | 3.082593  | -0.747104 |
| H    | -2.050834 | 2.046927  | -0.524456 |
| C    | -1.752077 | 3.478107  | 1.106374  |
| H    | -2.312374 | 2.896384  | 1.848712  |
| H    | -0.895100 | 3.903437  | 1.639338  |
| C    | -2.624653 | 4.575408  | 0.540321  |
| C    | -2.064671 | 5.781387  | 0.093184  |
| C    | -4.011450 | 4.406623  | 0.417498  |
| C    | -2.861351 | 6.783188  | -0.462909 |
| H    | -0.991780 | 5.936528  | 0.188448  |
| C    | -4.813682 | 5.404964  | -0.137773 |
| H    | -4.467727 | 3.482938  | 0.768950  |
| C    | -4.240628 | 6.598402  | -0.581613 |
| H    | -2.405308 | 7.711448  | -0.798184 |
| H    | -5.887320 | 5.253060  | -0.217971 |
| H    | -4.863226 | 7.379087  | -1.010676 |
| C    | 2.022096  | 0.094572  | -1.877797 |
| H    | 1.116784  | 1.216627  | -0.994544 |
| P    | -1.248847 | -1.540274 | -0.017009 |
| C    | -2.245776 | -1.865939 | -1.592578 |
| C    | -3.343592 | -2.955009 | -1.635916 |
| C    | -2.800924 | -0.544812 | -2.172653 |
| H    | -1.446085 | -2.194484 | -2.272285 |
| C    | -3.816313 | -3.176402 | -3.084785 |
| H    | -4.208595 | -2.646653 | -1.041766 |
| H    | -2.996238 | -3.898855 | -1.203685 |
| C    | -3.330493 | -0.740825 | -3.604443 |
| H    | -3.613042 | -0.174531 | -1.529678 |

|   |           |           |           |
|---|-----------|-----------|-----------|
| H | -2.020498 | 0.225288  | -2.168529 |
| C | -4.361873 | -1.875336 | -3.692294 |
| H | -4.585529 | -3.958938 | -3.107675 |
| H | -2.976621 | -3.543901 | -3.693216 |
| H | -3.764803 | 0.198445  | -3.969736 |
| H | -2.482665 | -0.970297 | -4.266858 |
| H | -4.660925 | -2.035955 | -4.735784 |
| H | -5.271682 | -1.581408 | -3.148175 |
| C | -2.440547 | -0.964306 | 1.346810  |
| C | -3.808877 | -1.665949 | 1.471608  |
| C | -1.742531 | -0.933026 | 2.728374  |
| H | -2.633392 | 0.079120  | 1.058937  |
| C | -4.684778 | -1.017651 | 2.562674  |
| H | -3.665130 | -2.732032 | 1.700351  |
| H | -4.353827 | -1.614465 | 0.526756  |
| C | -2.619433 | -0.249015 | 3.789282  |
| H | -1.553214 | -1.964482 | 3.055561  |
| H | -0.780851 | -0.418822 | 2.659489  |
| C | -3.979296 | -0.944473 | 3.922105  |
| H | -5.629242 | -1.570974 | 2.645994  |
| H | -4.949221 | 0.000873  | 2.241191  |
| H | -2.092366 | -0.246956 | 4.751586  |
| H | -2.764406 | 0.805175  | 3.512690  |
| H | -4.613070 | -0.422182 | 4.650091  |
| H | -3.829289 | -1.962885 | 4.311019  |
| C | -0.611854 | -3.232536 | 0.556030  |
| C | -0.216282 | -4.189803 | -0.593699 |
| C | 0.605290  | -3.069246 | 1.501104  |
| H | -1.431081 | -3.703165 | 1.120475  |
| C | 0.256116  | -5.551558 | -0.051835 |
| H | 0.593655  | -3.738709 | -1.179220 |
| H | -1.047434 | -4.350529 | -1.284478 |
| C | 1.088475  | -4.422245 | 2.050354  |
| H | 1.417631  | -2.593147 | 0.936753  |
| H | 0.379916  | -2.397663 | 2.331942  |
| C | 1.432264  | -5.402675 | 0.922241  |
| H | 0.533802  | -6.202094 | -0.891156 |
| H | -0.582439 | -6.045271 | 0.461473  |
| H | 1.959698  | -4.263931 | 2.698439  |
| H | 0.302508  | -4.857167 | 2.685821  |
| H | 1.712512  | -6.380253 | 1.334553  |
| H | 2.310585  | -5.030407 | 0.374537  |
| C | 1.434370  | -1.194067 | -1.821795 |
| H | 1.950251  | -1.978932 | -1.276110 |
| H | 0.833490  | -1.525921 | -2.665503 |
| H | 1.830280  | 0.682981  | -2.773810 |
| C | 3.343150  | 0.381955  | -1.243990 |
| C | 4.330267  | 1.048825  | -1.985363 |
| C | 3.648178  | -0.024892 | 0.065694  |
| C | 5.593939  | 1.283880  | -1.449541 |
| H | 4.108162  | 1.377972  | -2.997793 |
| C | 4.907223  | 0.206761  | 0.605156  |
| H | 2.880687  | -0.502007 | 0.668620  |
| C | 5.894025  | 0.859254  | -0.148581 |
| H | 6.349376  | 1.795644  | -2.035206 |
| H | 5.145802  | -0.101611 | 1.617743  |

|   |          |          |           |
|---|----------|----------|-----------|
| C | 7.224286 | 1.077186 | 0.480605  |
| O | 7.526574 | 0.715579 | 1.601939  |
| O | 8.085174 | 1.729747 | -0.337742 |
| C | 9.387101 | 1.969025 | 0.213546  |
| H | 9.942028 | 2.495710 | -0.563801 |
| H | 9.316624 | 2.580736 | 1.117172  |
| H | 9.878896 | 1.025088 | 0.464532  |

TS1c

|                                  |                     |         |         |
|----------------------------------|---------------------|---------|---------|
| B3LYP SCF energy:                | -1448.85754784 a.u. |         |         |
| B3LYP enthalpy:                  | -1448.239108 a.u.   |         |         |
| B3LYP free energy:               | -1448.332431 a.u.   |         |         |
| M06 SCF energy in solution:      | -2787.51276873 a.u. |         |         |
| M06 enthalpy in solution:        | -2786.894329 a.u.   |         |         |
| M06 free energy in solution:     | -2786.987652 a.u.   |         |         |
| Three lowest frequencies (cm-1): | -1200.0942          | 21.4062 | 32.0590 |
| Imaginary frequency:             | -1200.0942 cm-1     |         |         |

Cartesian coordinates

| ATOM | X         | Y         | Z         |
|------|-----------|-----------|-----------|
| Ni   | 0.067576  | 1.205626  | -0.581821 |
| P    | -1.321475 | -0.464410 | 0.054428  |
| C    | -0.948823 | -2.227863 | -0.672754 |
| C    | -1.181212 | -2.195773 | -2.200257 |
| C    | 0.551777  | -2.545755 | -0.485485 |
| C    | -1.769288 | -3.385895 | -0.067633 |
| H    | -2.234997 | -2.116151 | -2.474328 |
| H    | -0.633617 | -1.374695 | -2.674782 |
| H    | -0.807151 | -3.134439 | -2.629315 |
| H    | 0.836356  | -2.715825 | 0.552147  |
| H    | 0.784094  | -3.465261 | -1.039792 |
| H    | 1.176787  | -1.743427 | -0.875675 |
| H    | -1.516893 | -4.312570 | -0.601123 |
| H    | -1.532113 | -3.551550 | 0.986562  |
| H    | -2.847892 | -3.241999 | -0.155720 |
| C    | -1.374909 | -0.598946 | 1.992771  |
| C    | -2.640980 | -1.252120 | 2.584551  |
| C    | -0.142936 | -1.383047 | 2.496183  |
| C    | -1.225418 | 0.829563  | 2.567063  |
| H    | -3.547576 | -0.678708 | 2.377857  |
| H    | -2.795622 | -2.273017 | 2.226588  |
| H    | -2.534239 | -1.302289 | 3.676929  |
| H    | 0.791018  | -1.000398 | 2.073020  |
| H    | -0.083059 | -1.266662 | 3.586425  |
| H    | -0.210016 | -2.454361 | 2.293797  |
| H    | -1.173887 | 0.763682  | 3.662337  |
| H    | -0.302347 | 1.300348  | 2.214758  |
| H    | -2.055180 | 1.488708  | 2.314365  |
| C    | -3.069093 | 0.109245  | -0.591409 |
| C    | -2.880188 | 0.684149  | -2.018780 |
| C    | -4.165777 | -0.973650 | -0.615932 |
| C    | -3.569919 | 1.298183  | 0.259355  |
| H    | -2.209914 | 1.548392  | -2.003174 |
| H    | -2.503787 | -0.042843 | -2.739070 |

|   |           |           |           |
|---|-----------|-----------|-----------|
| H | -3.858037 | 1.028541  | -2.382739 |
| H | -4.337764 | -1.424997 | 0.365201  |
| H | -5.109506 | -0.507389 | -0.929857 |
| H | -3.955102 | -1.775325 | -1.328562 |
| H | -4.473083 | 1.700446  | -0.219295 |
| H | -3.850282 | 1.012945  | 1.275951  |
| H | -2.827222 | 2.099490  | 0.285114  |
| O | -0.866578 | 3.055635  | -0.532414 |
| C | 1.840828  | 0.781404  | -1.268249 |
| C | 1.589682  | 2.239783  | -1.445729 |
| H | 2.266259  | 2.889820  | -0.883480 |
| H | 1.515757  | 2.545337  | -2.494052 |
| C | -0.697054 | 3.927407  | 0.558092  |
| H | 0.336182  | 3.927699  | 0.954150  |
| H | -0.931476 | 4.962787  | 0.263318  |
| H | -1.361237 | 3.666027  | 1.398758  |
| H | 0.404452  | 2.786420  | -1.055358 |
| C | 2.874529  | 0.310418  | -0.311540 |
| C | 3.816497  | -0.690011 | -0.666332 |
| C | 2.953162  | 0.867826  | 0.980692  |
| C | 4.760784  | -1.103755 | 0.282572  |
| C | 3.904493  | 0.450614  | 1.907972  |
| H | 2.241070  | 1.641851  | 1.257735  |
| C | 4.813017  | -0.550646 | 1.561414  |
| H | 5.480711  | -1.870063 | 0.002713  |
| H | 3.932763  | 0.902116  | 2.896486  |
| H | 1.796160  | 0.206342  | -2.191483 |
| H | 5.559243  | -0.891671 | 2.274052  |
| C | 3.860922  | -1.292069 | -2.055119 |
| H | 2.951633  | -1.854656 | -2.300353 |
| H | 3.976340  | -0.520944 | -2.826899 |
| H | 4.705221  | -1.982534 | -2.148000 |

TS2c

|                                  |                     |         |         |
|----------------------------------|---------------------|---------|---------|
| B3LYP SCF energy:                | -1448.85174036 a.u. |         |         |
| B3LYP enthalpy:                  | -1448.233184 a.u.   |         |         |
| B3LYP free energy:               | -1448.327101 a.u.   |         |         |
| M06 SCF energy in solution:      | -2787.50813336 a.u. |         |         |
| M06 enthalpy in solution:        | -2786.889577 a.u.   |         |         |
| M06 free energy in solution:     | -2786.983494 a.u.   |         |         |
| Three lowest frequencies (cm-1): | -1227.8825          | 14.7800 | 27.2998 |
| Imaginary frequency:             | -1227.8825 cm-1     |         |         |

Cartesian coordinates

| ATOM | X         | Y         | Z         |
|------|-----------|-----------|-----------|
| Ni   | 0.310073  | 0.523713  | 0.318915  |
| P    | -1.811907 | -0.139485 | 0.048145  |
| C    | -2.788898 | 1.407069  | -0.610831 |
| C    | -2.435331 | 2.607387  | 0.302524  |
| C    | -2.250104 | 1.768437  | -2.014606 |
| C    | -4.322852 | 1.271935  | -0.685011 |
| H    | -2.836085 | 2.517399  | 1.312377  |
| H    | -1.352966 | 2.745362  | 0.374987  |
| H    | -2.861181 | 3.518895  | -0.137732 |

|   |           |           |           |
|---|-----------|-----------|-----------|
| H | -2.582220 | 1.068836  | -2.785864 |
| H | -2.644830 | 2.755646  | -2.289567 |
| H | -1.156889 | 1.822761  | -2.026228 |
| H | -4.734048 | 2.186819  | -1.133080 |
| H | -4.645293 | 0.433025  | -1.307295 |
| H | -4.785998 | 1.164097  | 0.299747  |
| C | -1.767815 | -1.503189 | -1.340504 |
| C | -3.089941 | -1.726231 | -2.102633 |
| C | -0.662795 | -1.112645 | -2.352073 |
| C | -1.324931 | -2.851590 | -0.730669 |
| H | -3.914337 | -2.017859 | -1.446892 |
| H | -3.399407 | -0.844942 | -2.669404 |
| H | -2.946268 | -2.538972 | -2.827669 |
| H | 0.306133  | -0.978589 | -1.861876 |
| H | -0.562162 | -1.923170 | -3.086772 |
| H | -0.876915 | -0.195874 | -2.898702 |
| H | -1.121375 | -3.551596 | -1.551410 |
| H | -0.404109 | -2.753137 | -0.147223 |
| H | -2.091028 | -3.310096 | -0.101234 |
| C | -2.756018 | -0.850789 | 1.592263  |
| C | -3.091618 | 0.299119  | 2.567912  |
| C | -4.059431 | -1.608414 | 1.260907  |
| C | -1.820037 | -1.798633 | 2.378336  |
| H | -2.209778 | 0.904408  | 2.802243  |
| H | -3.881155 | 0.957663  | 2.199441  |
| H | -3.450016 | -0.139070 | 3.508430  |
| H | -3.875431 | -2.528994 | 0.700870  |
| H | -4.548359 | -1.898227 | 2.200932  |
| H | -4.772322 | -1.003634 | 0.695954  |
| H | -2.366493 | -2.172283 | 3.254822  |
| H | -1.493076 | -2.666143 | 1.805954  |
| H | -0.932612 | -1.273147 | 2.733694  |
| C | 1.211655  | -0.271938 | 1.780986  |
| C | 2.250016  | 0.512105  | 1.057996  |
| H | 0.883993  | 0.136243  | 2.739969  |
| H | 2.572293  | 1.391337  | 1.619458  |
| H | 1.331884  | -1.355438 | 1.807687  |
| C | 3.392758  | -0.221601 | 0.400972  |
| C | 4.709600  | 0.290484  | 0.441805  |
| C | 3.160298  | -1.426979 | -0.278947 |
| C | 5.737048  | -0.432784 | -0.178740 |
| C | 4.193185  | -2.134619 | -0.890276 |
| H | 2.146018  | -1.813736 | -0.331507 |
| C | 5.494438  | -1.636053 | -0.839627 |
| H | 6.750162  | -0.038144 | -0.139713 |
| H | 3.979429  | -3.066117 | -1.408343 |
| O | 1.035241  | 1.780009  | -1.124603 |
| H | 1.785240  | 1.200851  | -0.054321 |
| C | 1.129497  | 3.172501  | -0.964515 |
| H | 1.869867  | 3.590847  | -1.665345 |
| H | 0.169519  | 3.677632  | -1.166139 |
| H | 1.440533  | 3.472513  | 0.054860  |
| H | 6.311841  | -2.173287 | -1.313284 |
| C | 5.042360  | 1.591784  | 1.139698  |
| H | 4.499484  | 2.441997  | 0.707340  |
| H | 4.794474  | 1.561545  | 2.208737  |

H 6.111603 1.810697 1.057327

TS3c

B3LYP SCF energy: -1989.61790811 a.u.  
B3LYP enthalpy: -1988.761060 a.u.  
B3LYP free energy: -1988.880538 a.u.  
M06 SCF energy in solution: -3328.04830057 a.u.  
M06 enthalpy in solution: -3327.191452 a.u.  
M06 free energy in solution: -3327.310930 a.u.  
Three lowest frequencies (cm-1): -432.8117 6.5356 11.2662  
Imaginary frequency: -432.8117 cm-1

Cartesian coordinates

| ATOM | X         | Y         | Z         |
|------|-----------|-----------|-----------|
| Ni   | 0.129508  | -1.382798 | 0.338876  |
| C    | -1.463879 | -1.602163 | -0.691700 |
| O    | -1.384822 | -1.843780 | -1.886074 |
| C    | -2.839226 | -1.484581 | -0.014029 |
| H    | -2.919528 | -2.353855 | 0.655294  |
| H    | -2.840799 | -0.611712 | 0.653059  |
| C    | -4.031753 | -1.448006 | -0.988416 |
| H    | -3.941689 | -0.566410 | -1.633970 |
| H    | -3.961475 | -2.317373 | -1.650854 |
| C    | -5.364229 | -1.433175 | -0.273530 |
| C    | -6.001624 | -2.630506 | 0.083918  |
| C    | -5.985183 | -0.225183 | 0.075364  |
| C    | -7.217120 | -2.622742 | 0.769609  |
| H    | -5.540911 | -3.578778 | -0.185938 |
| C    | -7.201067 | -0.210838 | 0.760937  |
| H    | -5.512252 | 0.715402  | -0.201273 |
| C    | -7.822098 | -1.411288 | 1.111523  |
| H    | -7.695155 | -3.563426 | 1.031479  |
| H    | -7.666333 | 0.738151  | 1.016036  |
| H    | -8.770775 | -1.402988 | 1.641719  |
| C    | 0.844223  | -2.795564 | 1.740447  |
| H    | 0.963504  | -3.824186 | 1.410170  |
| H    | 0.183124  | -2.672077 | 2.595049  |
| H    | -0.496652 | -2.732638 | 0.560468  |
| P    | 0.497710  | 0.840878  | -0.102719 |
| C    | 0.923021  | 1.667714  | 1.548289  |
| C    | 1.327871  | 3.158480  | 1.635827  |
| C    | -0.161522 | 1.353013  | 2.604621  |
| H    | 1.813630  | 1.089092  | 1.832565  |
| C    | 1.848060  | 3.486535  | 3.047947  |
| H    | 0.469570  | 3.803639  | 1.432872  |
| H    | 2.085305  | 3.413485  | 0.888053  |
| C    | 0.313420  | 1.716833  | 4.022449  |
| H    | -1.077631 | 1.914758  | 2.371219  |
| H    | -0.429634 | 0.289950  | 2.561130  |
| C    | 0.789225  | 3.174061  | 4.115921  |
| H    | 2.138421  | 4.543829  | 3.098513  |
| H    | 2.758107  | 2.902177  | 3.250618  |
| H    | -0.492863 | 1.531381  | 4.743593  |
| H    | 1.141757  | 1.048920  | 4.302168  |

|   |           |           |           |
|---|-----------|-----------|-----------|
| H | 1.184432  | 3.380163  | 5.118691  |
| H | -0.070531 | 3.845815  | 3.974782  |
| C | -1.019652 | 1.736394  | -0.843486 |
| C | -1.168688 | 3.244942  | -0.551617 |
| C | -1.154910 | 1.479547  | -2.365159 |
| H | -1.859932 | 1.228136  | -0.350862 |
| C | -2.463061 | 3.828643  | -1.149820 |
| H | -0.303844 | 3.792144  | -0.953314 |
| H | -1.186564 | 3.422110  | 0.526314  |
| C | -2.458871 | 2.060840  | -2.937831 |
| H | -0.312553 | 1.953738  | -2.886672 |
| H | -1.112912 | 0.409401  | -2.579189 |
| C | -2.584302 | 3.561214  | -2.653416 |
| H | -2.503639 | 4.905924  | -0.942475 |
| H | -3.325799 | 3.380865  | -0.633932 |
| H | -2.496794 | 1.867001  | -4.017195 |
| H | -3.318059 | 1.533347  | -2.498436 |
| H | -3.536870 | 3.950150  | -3.035203 |
| H | -1.787618 | 4.101341  | -3.186519 |
| C | 1.924522  | 1.244067  | -1.281248 |
| C | 3.314482  | 1.301881  | -0.608117 |
| C | 1.980337  | 0.203056  | -2.427690 |
| H | 1.712660  | 2.235660  | -1.709268 |
| C | 4.412958  | 1.660340  | -1.626863 |
| H | 3.542356  | 0.323153  | -0.171077 |
| H | 3.337658  | 2.029833  | 0.207258  |
| C | 3.066341  | 0.555186  | -3.458048 |
| H | 2.201182  | -0.778383 | -1.989247 |
| H | 1.015043  | 0.102571  | -2.927186 |
| C | 4.447923  | 0.674577  | -2.801817 |
| H | 5.385729  | 1.682904  | -1.118746 |
| H | 4.234930  | 2.677977  | -2.006580 |
| H | 3.082424  | -0.207937 | -4.246511 |
| H | 2.809371  | 1.506217  | -3.949290 |
| H | 5.198035  | 0.988741  | -3.539293 |
| H | 4.758674  | -0.312761 | -2.432962 |
| C | 1.882814  | -1.874164 | 1.538556  |
| H | 1.979599  | -1.071131 | 2.260623  |
| C | 3.084498  | -2.225863 | 0.751175  |
| C | 4.377033  | -1.807337 | 1.159314  |
| C | 2.971694  | -3.029071 | -0.400445 |
| C | 5.488046  | -2.196945 | 0.401386  |
| C | 4.090170  | -3.410011 | -1.138976 |
| H | 1.983721  | -3.343209 | -0.727664 |
| C | 5.359881  | -2.989991 | -0.740204 |
| H | 6.477527  | -1.879227 | 0.723578  |
| H | 3.967109  | -4.027159 | -2.025160 |
| H | 6.241695  | -3.279939 | -1.305118 |
| C | 4.583722  | -0.983014 | 2.411050  |
| H | 5.649960  | -0.816580 | 2.593747  |
| H | 4.107184  | 0.004320  | 2.343609  |
| H | 4.166472  | -1.478408 | 3.296625  |



B3LYP SCF energy: -1989.61770092 a.u.  
 B3LYP enthalpy: -1988.761459 a.u.  
 B3LYP free energy: -1988.881864 a.u.  
 M06 SCF energy in solution: -3328.04412334 a.u.  
 M06 enthalpy in solution: -3327.187881 a.u.  
 M06 free energy in solution: -3327.308286 a.u.  
 Three lowest frequencies (cm-1): -488.5851 10.1953 12.8761  
 Imaginary frequency: -488.5851 cm-1

Cartesian coordinates

| ATOM | X         | Y         | Z         |
|------|-----------|-----------|-----------|
| Ni   | -0.657307 | 0.836063  | 0.290347  |
| C    | 0.848581  | 1.354236  | -0.767472 |
| O    | 0.677907  | 1.543616  | -1.965334 |
| C    | 2.242348  | 1.544780  | -0.153216 |
| H    | 2.163013  | 2.406428  | 0.526015  |
| H    | 2.465232  | 0.688660  | 0.498183  |
| C    | 3.371881  | 1.768147  | -1.177264 |
| H    | 3.431431  | 0.895900  | -1.839575 |
| H    | 3.098609  | 2.615217  | -1.815483 |
| C    | 4.709824  | 2.009930  | -0.515667 |
| C    | 5.110445  | 3.304235  | -0.152146 |
| C    | 5.571542  | 0.944497  | -0.216833 |
| C    | 6.327652  | 3.527070  | 0.493107  |
| H    | 4.460799  | 4.146135  | -0.383172 |
| C    | 6.790397  | 1.160970  | 0.428149  |
| H    | 5.284723  | -0.066619 | -0.500353 |
| C    | 7.173039  | 2.454960  | 0.787212  |
| H    | 6.618748  | 4.539662  | 0.761404  |
| H    | 7.443883  | 0.319449  | 0.644982  |
| H    | 8.122980  | 2.627011  | 1.286433  |
| C    | -1.993831 | 2.196920  | 1.263578  |
| H    | -0.421434 | 2.315274  | 0.499359  |
| P    | -0.508923 | -1.412866 | 0.037980  |
| C    | -0.255481 | -2.097871 | 1.785486  |
| C    | -0.212864 | -3.619014 | 2.062070  |
| C    | 0.947943  | -1.409138 | 2.469108  |
| H    | -1.158010 | -1.711524 | 2.281234  |
| C    | -0.244449 | -3.886083 | 3.578246  |
| H    | 0.707965  | -4.052523 | 1.661971  |
| H    | -1.037687 | -4.144401 | 1.570000  |
| C    | 0.972188  | -1.696254 | 3.980987  |
| H    | 1.883533  | -1.766938 | 2.014330  |
| H    | 0.907336  | -0.327070 | 2.295978  |
| C    | 0.934229  | -3.200993 | 4.285636  |
| H    | -0.222807 | -4.967676 | 3.763802  |
| H    | -1.191781 | -3.515258 | 3.997063  |
| H    | 1.862341  | -1.238302 | 4.430687  |
| H    | 0.102111  | -1.210890 | 4.447618  |
| H    | 0.879459  | -3.367451 | 5.368902  |
| H    | 1.872933  | -3.663168 | 3.945567  |
| C    | 0.933180  | -1.994661 | -1.057871 |
| C    | 1.432190  | -3.446255 | -0.899326 |
| C    | 0.661468  | -1.698012 | -2.553097 |
| H    | 1.750067  | -1.331196 | -0.739376 |
| C    | 2.658761  | -3.728805 | -1.789401 |

|   |           |           |           |
|---|-----------|-----------|-----------|
| H | 0.625926  | -4.150356 | -1.151701 |
| H | 1.713394  | -3.644344 | 0.136804  |
| C | 1.905750  | -1.957495 | -3.418457 |
| H | -0.143382 | -2.356791 | -2.906939 |
| H | 0.330871  | -0.665035 | -2.686066 |
| C | 2.404871  | -3.399196 | -3.264780 |
| H | 2.957907  | -4.778672 | -1.673391 |
| H | 3.503038  | -3.123544 | -1.426739 |
| H | 1.670661  | -1.741123 | -4.468155 |
| H | 2.701860  | -1.256580 | -3.128280 |
| H | 3.318292  | -3.558096 | -3.852016 |
| H | 1.648911  | -4.089688 | -3.667959 |
| C | -2.037817 | -2.290229 | -0.659776 |
| C | -3.137117 | -2.598698 | 0.383739  |
| C | -2.665797 | -1.460377 | -1.808396 |
| H | -1.688590 | -3.248665 | -1.073231 |
| C | -4.319826 | -3.347446 | -0.256985 |
| H | -3.500860 | -1.659017 | 0.816455  |
| H | -2.747583 | -3.193181 | 1.213848  |
| C | -3.850146 | -2.195223 | -2.458312 |
| H | -3.008015 | -0.501205 | -1.398451 |
| H | -1.924482 | -1.214341 | -2.571772 |
| C | -4.926201 | -2.563735 | -1.428533 |
| H | -5.083343 | -3.546635 | 0.506116  |
| H | -3.972899 | -4.328429 | -0.614603 |
| H | -4.278438 | -1.569410 | -3.251455 |
| H | -3.484279 | -3.110698 | -2.947123 |
| H | -5.728196 | -3.144475 | -1.901753 |
| H | -5.390175 | -1.642895 | -1.045631 |
| C | -2.418412 | 0.855553  | 1.358543  |
| H | -3.247517 | 0.525744  | 0.739836  |
| H | -2.274459 | 0.315232  | 2.292165  |
| H | -1.536125 | 2.625698  | 2.153891  |
| C | -2.710410 | 3.179624  | 0.383514  |
| C | -3.605261 | 4.101244  | 0.974169  |
| C | -2.539458 | 3.180450  | -1.007153 |
| C | -4.305339 | 4.984453  | 0.144292  |
| C | -3.250125 | 4.066642  | -1.818542 |
| C | -4.137745 | 4.972754  | -1.241241 |
| H | -4.995702 | 5.693331  | 0.596507  |
| H | -3.097729 | 4.052569  | -2.894427 |
| H | -4.693352 | 5.671511  | -1.861329 |
| H | -1.816974 | 2.500139  | -1.451145 |
| C | -3.823804 | 4.138761  | 2.470103  |
| H | -4.132076 | 3.160724  | 2.859411  |
| H | -2.910027 | 4.421468  | 3.010426  |
| H | -4.598133 | 4.865910  | 2.733567  |

TS7a

|                             |                     |
|-----------------------------|---------------------|
| B3LYP SCF energy:           | -2175.68936555 a.u. |
| B3LYP enthalpy:             | -2174.695310 a.u.   |
| B3LYP free energy:          | -2174.843467 a.u.   |
| M06 SCF energy in solution: | -3514.00827069 a.u. |
| M06 enthalpy in solution:   | -3513.014215 a.u.   |

M06 free energy in solution: -3513.162372 a.u.  
Three lowest frequencies (cm-1): -995.9637 12.8700 17.1962  
Imaginary frequency: -995.9637 cm-1

Cartesian coordinates

| ATOM | X         | Y         | Z         |
|------|-----------|-----------|-----------|
| Ni   | 0.442223  | -0.139037 | -1.105032 |
| Al   | -6.455237 | 0.064306  | -1.528123 |
| N    | 0.486770  | -0.260261 | 1.882962  |
| N    | 1.809709  | 1.264060  | 1.121753  |
| N    | -4.382208 | 0.047007  | -1.483025 |
| C    | 0.922119  | 0.295985  | 0.701244  |
| C    | 1.092503  | 0.335212  | 2.987310  |
| C    | 1.911368  | 1.298565  | 2.511796  |
| C    | -3.730004 | -1.071790 | -1.101359 |
| C    | -2.347488 | -1.155875 | -1.041668 |
| C    | -1.532363 | -0.047728 | -1.367487 |
| C    | -2.243196 | 1.099231  | -1.784278 |
| C    | -3.632086 | 1.114866  | -1.822048 |
| C    | -6.876531 | 1.948868  | -2.055860 |
| C    | -6.863421 | -1.342790 | -2.890489 |
| C    | -6.911632 | -0.420153 | 0.362829  |
| C    | 1.167513  | -0.568649 | -3.013313 |
| C    | 2.200817  | -0.587307 | -2.040377 |
| C    | -0.569395 | -1.236213 | 2.045221  |
| C    | -0.287251 | -2.604969 | 1.845316  |
| C    | -1.833929 | -0.780337 | 2.473982  |
| C    | -1.331350 | -3.516394 | 2.044737  |
| C    | -2.838673 | -1.738690 | 2.664357  |
| C    | -2.596395 | -3.089862 | 2.444077  |
| C    | 1.116823  | -3.096119 | 1.503786  |
| C    | -2.134413 | 0.685652  | 2.781911  |
| C    | -3.370267 | 1.213925  | 2.031660  |
| C    | -2.297064 | 0.896687  | 4.302452  |
| C    | 1.130403  | -4.357622 | 0.624449  |
| C    | 1.930653  | -3.340114 | 2.793708  |
| C    | 2.560965  | 2.178401  | 0.290147  |
| C    | 3.954895  | 1.990983  | 0.167521  |
| C    | 1.894288  | 3.276235  | -0.301120 |
| C    | 4.674104  | 2.926329  | -0.589136 |
| C    | 4.038360  | 4.000000  | -1.201278 |
| C    | 2.663858  | 4.170126  | -1.055278 |
| C    | 4.706362  | 0.845687  | 0.844949  |
| C    | 5.678114  | 0.126280  | -0.110112 |
| C    | 5.476875  | 1.344042  | 2.086600  |
| C    | 0.405551  | 3.538339  | -0.077134 |
| C    | -0.264653 | 4.302545  | -1.231587 |
| C    | 0.182185  | 4.294997  | 1.250868  |
| H    | 0.867462  | 0.024809  | 3.994940  |
| H    | 2.547429  | 2.005434  | 3.018812  |
| H    | -4.359647 | -1.915999 | -0.836260 |
| H    | -1.905373 | -2.094643 | -0.721273 |
| H    | -0.357917 | -0.368602 | -2.367693 |
| H    | -1.714278 | 1.995743  | -2.093757 |
| H    | -4.185113 | 1.996227  | -2.131415 |
| H    | -6.495067 | 2.703061  | -1.351089 |

|   |           |           |           |
|---|-----------|-----------|-----------|
| H | -7.967162 | 2.091886  | -2.086419 |
| H | -6.510224 | 2.226217  | -3.055589 |
| H | -6.459635 | -1.103873 | -3.885102 |
| H | -7.949419 | -1.463854 | -3.019336 |
| H | -6.476099 | -2.337349 | -2.623119 |
| H | -6.491269 | -1.385541 | 0.683170  |
| H | -8.000496 | -0.504494 | 0.496497  |
| H | -6.569987 | 0.332657  | 1.088630  |
| H | -3.825594 | -1.418822 | 2.984399  |
| H | -1.152146 | -4.576075 | 1.896183  |
| H | -1.281951 | 1.287462  | 2.454336  |
| H | 1.616931  | -2.304251 | 0.939686  |
| H | -3.155554 | 0.334617  | 4.688141  |
| H | -2.464231 | 1.957101  | 4.524576  |
| H | -1.410967 | 0.569320  | 4.858296  |
| H | -3.519270 | 2.275125  | 2.264817  |
| H | -4.286213 | 0.685208  | 2.315937  |
| H | -3.248654 | 1.117019  | 0.950500  |
| H | 1.460716  | -4.116727 | 3.409058  |
| H | 2.010175  | -2.432350 | 3.401267  |
| H | 2.947126  | -3.671255 | 2.548934  |
| H | 2.154711  | -4.572036 | 0.300566  |
| H | 0.510658  | -4.233408 | -0.270330 |
| H | 0.772131  | -5.241711 | 1.164389  |
| H | -3.391692 | -3.815366 | 2.592819  |
| H | 5.747490  | 2.807921  | -0.700944 |
| H | 4.613956  | 4.710967  | -1.787953 |
| H | 3.970818  | 0.106707  | 1.178046  |
| H | 5.180878  | -0.186993 | -1.031858 |
| H | 6.088061  | -0.766004 | 0.377106  |
| H | 6.526588  | 0.763254  | -0.384998 |
| H | 5.991629  | 0.509874  | 2.577857  |
| H | 4.816356  | 1.812073  | 2.823659  |
| H | 6.232788  | 2.085675  | 1.802453  |
| H | -0.096275 | 2.569084  | -0.002039 |
| H | -0.066052 | 3.831325  | -2.200766 |
| H | 0.069802  | 5.345067  | -1.287906 |
| H | -1.349004 | 4.322604  | -1.077765 |
| H | 0.577423  | 3.740539  | 2.108018  |
| H | -0.888560 | 4.458568  | 1.420949  |
| H | 0.674234  | 5.275010  | 1.226531  |
| H | 2.183580  | 5.019317  | -1.528677 |
| H | 0.856304  | -1.508974 | -3.471686 |
| H | 1.064047  | 0.293233  | -3.672407 |
| H | 2.833002  | 0.297759  | -1.979248 |
| C | 2.869231  | -1.897792 | -1.667070 |
| H | 3.343250  | -1.813645 | -0.679550 |
| H | 2.111088  | -2.686895 | -1.576032 |
| C | 3.928357  | -2.356420 | -2.691337 |
| H | 4.673985  | -1.559769 | -2.831421 |
| H | 3.443910  | -2.488899 | -3.669213 |
| C | 4.641179  | -3.654978 | -2.291673 |
| H | 5.132825  | -3.512696 | -1.318271 |
| H | 3.893187  | -4.447177 | -2.141917 |
| C | 5.675496  | -4.120090 | -3.322521 |
| H | 6.454719  | -3.362306 | -3.471574 |

|   |          |           |           |
|---|----------|-----------|-----------|
| H | 5.206989 | -4.307165 | -4.296558 |
| H | 6.168068 | -5.046932 | -3.006497 |

TS8a

|                                  |                     |         |         |
|----------------------------------|---------------------|---------|---------|
| B3LYP SCF energy:                | -2175.69514137 a.u. |         |         |
| B3LYP enthalpy:                  | -2174.701328 a.u.   |         |         |
| B3LYP free energy:               | -2174.851743 a.u.   |         |         |
| M06 SCF energy in solution:      | -3514.01132735 a.u. |         |         |
| M06 enthalpy in solution:        | -3513.017514 a.u.   |         |         |
| M06 free energy in solution:     | -3513.167929 a.u.   |         |         |
| Three lowest frequencies (cm-1): | -639.9689           | 12.6504 | 16.3231 |
| Imaginary frequency:             | -639.9689 cm-1      |         |         |

Cartesian coordinates

| ATOM | X         | Y         | Z         |
|------|-----------|-----------|-----------|
| Ni   | -0.540849 | 0.553517  | -0.767080 |
| Al   | 6.034015  | 2.156598  | 0.391328  |
| N    | -1.886496 | -1.340815 | 1.139546  |
| N    | -0.280465 | -2.302450 | 0.073227  |
| N    | 4.038697  | 1.711683  | 0.073115  |
| C    | -0.903284 | -1.084617 | 0.208465  |
| C    | -1.862127 | -2.670479 | 1.559675  |
| C    | -0.863036 | -3.275954 | 0.881146  |
| C    | 3.047563  | 2.186636  | 0.855232  |
| C    | 1.707476  | 1.901080  | 0.630484  |
| C    | 1.301699  | 1.068690  | -0.437829 |
| C    | 2.363603  | 0.598220  | -1.246280 |
| C    | 3.679986  | 0.926977  | -0.966067 |
| C    | 6.848175  | 0.338927  | 0.618783  |
| C    | 6.532390  | 3.104632  | -1.299503 |
| C    | 5.987781  | 3.288754  | 2.042923  |
| C    | -1.664537 | 1.840561  | -2.064383 |
| C    | -2.384476 | 0.714670  | -1.657154 |
| C    | -2.868577 | -0.409130 | 1.649182  |
| C    | -4.210677 | -0.545696 | 1.229893  |
| C    | -2.471257 | 0.552705  | 2.605108  |
| C    | -5.156254 | 0.329519  | 1.781584  |
| C    | -3.458815 | 1.406695  | 3.111429  |
| C    | -4.786973 | 1.299941  | 2.706145  |
| C    | -4.672641 | -1.617467 | 0.241450  |
| C    | -1.039285 | 0.625795  | 3.133458  |
| C    | -0.632434 | 2.028513  | 3.615558  |
| C    | -0.827830 | -0.399257 | 4.269576  |
| C    | -5.559840 | -1.055239 | -0.887164 |
| C    | -5.419904 | -2.754048 | 0.971846  |
| C    | 0.888015  | -2.585837 | -0.728502 |
| C    | 0.743512  | -2.770932 | -2.118761 |
| C    | 2.128753  | -2.731306 | -0.070674 |
| C    | 1.897368  | -3.068738 | -2.855684 |
| C    | 3.137583  | -3.195033 | -2.235626 |
| C    | 3.246489  | -3.036392 | -0.857356 |
| C    | -0.609454 | -2.728511 | -2.823517 |
| C    | -0.611208 | -1.776968 | -4.034043 |
| C    | -1.050071 | -4.148048 | -3.236749 |

|   |           |           |           |
|---|-----------|-----------|-----------|
| C | 2.286120  | -2.617324 | 1.445009  |
| C | 3.379535  | -1.617084 | 1.861617  |
| C | 2.557541  | -4.003622 | 2.067074  |
| H | -2.551176 | -3.047158 | 2.297931  |
| H | -0.502849 | -4.291996 | 0.897783  |
| H | 3.364377  | 2.819162  | 1.678536  |
| H | 0.973543  | 2.346605  | 1.294590  |
| H | 0.099182  | 1.758542  | -1.360204 |
| H | 2.166648  | -0.035794 | -2.105371 |
| H | 4.495629  | 0.561043  | -1.583023 |
| H | 6.475044  | -0.187713 | 1.509590  |
| H | 7.939796  | 0.410047  | 0.737890  |
| H | 6.680477  | -0.329032 | -0.239846 |
| H | 6.408625  | 2.487242  | -2.201864 |
| H | 7.588519  | 3.412997  | -1.284279 |
| H | 5.945653  | 4.020666  | -1.461363 |
| H | 5.431994  | 4.230625  | 1.921946  |
| H | 7.011547  | 3.579191  | 2.323254  |
| H | 5.569552  | 2.778266  | 2.923525  |
| H | -1.214117 | 1.825441  | -3.057458 |
| H | -2.502967 | -0.135967 | -2.322782 |
| H | -3.124919 | 0.813553  | -0.869195 |
| H | -3.188032 | 2.161179  | 3.841843  |
| H | -6.196019 | 0.248855  | 1.479630  |
| H | -0.366599 | 0.360377  | 2.312518  |
| H | -3.784633 | -2.050072 | -0.229715 |
| H | -1.489193 | -0.181320 | 5.117046  |
| H | 0.207062  | -0.360381 | 4.629326  |
| H | -1.029758 | -1.422856 | 3.938219  |
| H | 0.441498  | 2.046083  | 3.829995  |
| H | -1.148584 | 2.313519  | 4.539882  |
| H | -0.841764 | 2.795618  | 2.861662  |
| H | -6.329411 | -2.376817 | 1.454042  |
| H | -4.803439 | -3.218778 | 1.748239  |
| H | -5.714985 | -3.535730 | 0.262128  |
| H | -5.783171 | -1.847367 | -1.611359 |
| H | -5.069839 | -0.236355 | -1.421456 |
| H | -6.518668 | -0.685208 | -0.506978 |
| H | -5.535452 | 1.971546  | 3.118120  |
| H | 1.820173  | -3.217492 | -3.928777 |
| H | 4.019383  | -3.427530 | -2.826648 |
| H | -1.349728 | -2.348966 | -2.114440 |
| H | -0.316084 | -0.764713 | -3.738195 |
| H | -1.614365 | -1.726092 | -4.473993 |
| H | 0.073903  | -2.113611 | -4.820529 |
| H | -2.042294 | -4.121981 | -3.703043 |
| H | -1.099850 | -4.818169 | -2.370996 |
| H | -0.351321 | -4.587442 | -3.958303 |
| H | 1.343561  | -2.248266 | 1.859631  |
| H | 3.170192  | -0.616830 | 1.476113  |
| H | 4.372102  | -1.913294 | 1.505997  |
| H | 3.428838  | -1.557846 | 2.955469  |
| H | 1.768730  | -4.724331 | 1.822236  |
| H | 2.618948  | -3.926107 | 3.158825  |
| H | 3.506589  | -4.417915 | 1.707455  |
| H | 4.216841  | -3.146540 | -0.382894 |

|   |           |          |           |
|---|-----------|----------|-----------|
| C | -1.959495 | 3.228798 | -1.523080 |
| H | -1.049025 | 3.842090 | -1.526456 |
| H | -2.284079 | 3.151690 | -0.476987 |
| C | -3.048501 | 3.944395 | -2.344844 |
| H | -3.964699 | 3.337629 | -2.336049 |
| H | -2.729324 | 4.003514 | -3.396008 |
| C | -3.360707 | 5.355843 | -1.830136 |
| H | -2.439445 | 5.955390 | -1.834898 |
| H | -3.679254 | 5.294731 | -0.779615 |
| C | -4.439728 | 6.070164 | -2.650912 |
| H | -4.132976 | 6.179903 | -3.698401 |
| H | -5.382669 | 5.509487 | -2.639717 |
| H | -4.643183 | 7.072510 | -2.257043 |

TS1d

|                                               |                             |         |         |
|-----------------------------------------------|-----------------------------|---------|---------|
| B3LYP SCF energy:                             | -1754.71230522 a.u.         |         |         |
| B3LYP enthalpy:                               | -1753.910472 a.u.           |         |         |
| B3LYP free energy:                            | -1754.032605 a.u.           |         |         |
| M06 SCF energy in solution:                   | -3093.12582189 a.u.         |         |         |
| M06 enthalpy in solution:                     | -3092.323989 a.u.           |         |         |
| M06 free energy in solution:                  | -3092.446122 a.u.           |         |         |
| Three lowest frequencies (cm <sup>-1</sup> ): | -1208.7720                  | 12.3821 | 17.2115 |
| Imaginary frequency:                          | -1208.7720 cm <sup>-1</sup> |         |         |

Cartesian coordinates

| ATOM | X         | Y         | Z         |
|------|-----------|-----------|-----------|
| Ni   | -0.309214 | 0.068077  | -1.449625 |
| O    | -1.482336 | 1.442384  | -2.480026 |
| C    | 0.744711  | -1.376900 | -2.188999 |
| C    | 0.044115  | -0.667440 | -3.300501 |
| H    | 0.713043  | -0.212118 | -4.036921 |
| H    | -0.727558 | -1.272215 | -3.787334 |
| C    | -0.918807 | 2.670288  | -2.860711 |
| H    | 0.132925  | 2.580563  | -3.192368 |
| H    | -1.483447 | 3.116124  | -3.697099 |
| H    | -0.931642 | 3.398789  | -2.032386 |
| H    | -0.747936 | 0.417709  | -3.044045 |
| C    | 2.224427  | -1.350764 | -2.114447 |
| C    | 2.939959  | -2.530373 | -1.835744 |
| C    | 2.973082  | -0.183201 | -2.364556 |
| C    | 4.335586  | -2.547741 | -1.808687 |
| H    | 2.387795  | -3.451545 | -1.659706 |
| C    | 4.365459  | -0.197683 | -2.338819 |
| H    | 2.449274  | 0.746174  | -2.573511 |
| C    | 5.057618  | -1.380357 | -2.060467 |
| H    | 4.858209  | -3.478125 | -1.599023 |
| H    | 4.915037  | 0.720252  | -2.532879 |
| H    | 6.144249  | -1.390331 | -2.042805 |
| H    | 0.331848  | -2.355136 | -1.936887 |
| N    | 0.306234  | 0.612952  | 1.470159  |
| N    | -1.696187 | -0.076204 | 1.065773  |
| C    | -0.495482 | 0.173196  | 0.445433  |
| C    | -0.387593 | 0.650483  | 2.679278  |
| C    | -1.641910 | 0.211772  | 2.425954  |

|   |           |           |           |
|---|-----------|-----------|-----------|
| C | 1.718858  | 0.914347  | 1.396728  |
| C | 2.134712  | 2.171428  | 0.908026  |
| C | 2.628240  | -0.042811 | 1.894152  |
| C | 3.508808  | 2.438220  | 0.903500  |
| C | 3.990504  | 0.282160  | 1.869021  |
| C | 4.428865  | 1.505023  | 1.374443  |
| C | 1.135440  | 3.239500  | 0.468970  |
| C | 2.184345  | -1.375424 | 2.495426  |
| C | 2.946435  | -2.577414 | 1.909484  |
| C | 2.319858  | -1.355381 | 4.032798  |
| C | 1.670017  | 4.158204  | -0.642442 |
| C | 0.679240  | 4.082486  | 1.679849  |
| C | -2.885776 | -0.597552 | 0.429213  |
| C | -3.921914 | 0.296315  | 0.094208  |
| C | -2.992600 | -1.992044 | 0.232879  |
| C | -5.091358 | -0.246519 | -0.454300 |
| C | -5.221543 | -1.614748 | -0.665637 |
| C | -4.181018 | -2.476136 | -0.325745 |
| C | -3.826370 | 1.800304  | 0.330834  |
| C | -4.170807 | 2.605453  | -0.935569 |
| C | -4.710949 | 2.226884  | 1.520536  |
| C | -1.895946 | -2.962711 | 0.665195  |
| C | -1.685212 | -4.119118 | -0.328085 |
| C | -2.185248 | -3.512350 | 2.078294  |
| H | 0.080535  | 0.979742  | 3.592800  |
| H | -2.496222 | 0.081495  | 3.070841  |
| H | 4.715831  | -0.435592 | 2.240009  |
| H | 3.866321  | 3.392286  | 0.531367  |
| H | 1.126284  | -1.520454 | 2.257470  |
| H | 0.255120  | 2.729603  | 0.066326  |
| H | 3.366691  | -1.225145 | 4.332142  |
| H | 1.963132  | -2.299679 | 4.461149  |
| H | 1.743146  | -0.541055 | 4.484740  |
| H | 2.527619  | -3.511206 | 2.303923  |
| H | 4.008949  | -2.558012 | 2.178776  |
| H | 2.878204  | -2.597696 | 0.818975  |
| H | 1.529704  | 4.610327  | 2.128520  |
| H | 0.220029  | 3.461999  | 2.456489  |
| H | -0.058800 | 4.831407  | 1.368543  |
| H | 0.864282  | 4.804828  | -1.005806 |
| H | 2.049085  | 3.582656  | -1.493405 |
| H | 2.474147  | 4.813128  | -0.286691 |
| H | 5.490803  | 1.735816  | 1.359686  |
| H | -5.908116 | 0.416333  | -0.723271 |
| H | -6.136810 | -2.013486 | -1.095401 |
| H | -2.788416 | 2.035844  | 0.583840  |
| H | -3.531843 | 2.284877  | -1.763115 |
| H | -4.005319 | 3.674366  | -0.752114 |
| H | -5.222172 | 2.484048  | -1.223599 |
| H | -4.609750 | 3.302941  | 1.705627  |
| H | -4.440046 | 1.698685  | 2.442452  |
| H | -5.768984 | 2.019976  | 1.319165  |
| H | -0.954796 | -2.407349 | 0.708676  |
| H | -1.534351 | -3.748150 | -1.347142 |
| H | -2.533997 | -4.812808 | -0.342516 |
| H | -0.800201 | -4.698810 | -0.041138 |



|   |           |           |           |
|---|-----------|-----------|-----------|
| H | -2.254381 | -2.706405 | 2.816976  |
| H | -1.388009 | -4.194934 | 2.396879  |
| H | -3.131743 | -4.066121 | 2.096162  |
| H | -4.297838 | -3.542422 | -0.491265 |

TS2d

|                                  |                     |         |         |
|----------------------------------|---------------------|---------|---------|
| B3LYP SCF energy:                | -1754.71071050 a.u. |         |         |
| B3LYP enthalpy:                  | -1753.908621 a.u.   |         |         |
| B3LYP free energy:               | -1754.031475 a.u.   |         |         |
| M06 SCF energy in solution:      | -3093.12029853 a.u. |         |         |
| M06 enthalpy in solution:        | -3092.318209 a.u.   |         |         |
| M06 free energy in solution:     | -3092.441063 a.u.   |         |         |
| Three lowest frequencies (cm-1): | -1274.1088          | 14.1594 | 20.8549 |
| Imaginary frequency:             | -1274.1088 cm-1     |         |         |

Cartesian coordinates

| ATOM | X         | Y         | Z         |
|------|-----------|-----------|-----------|
| Ni   | -0.162422 | 0.806355  | -0.656358 |
| O    | 0.302153  | 2.792359  | -0.147831 |
| C    | -1.396691 | 0.215883  | -1.962278 |
| C    | -1.504908 | 1.695680  | -1.936972 |
| H    | -1.133415 | 2.164394  | -2.858193 |
| C    | 1.306452  | 3.480777  | -0.856195 |
| H    | 1.253065  | 3.308106  | -1.947720 |
| H    | 1.212517  | 4.567814  | -0.696641 |
| H    | 2.315937  | 3.183694  | -0.533840 |
| H    | -0.607501 | 2.358963  | -1.083293 |
| H    | -2.246883 | -0.356063 | -1.589101 |
| N    | 1.994700  | -0.871866 | 0.444495  |
| N    | 0.060313  | -1.745886 | 0.805368  |
| C    | 0.659354  | -0.662275 | 0.211792  |
| C    | 2.214975  | -2.045140 | 1.160573  |
| C    | 0.997596  | -2.590204 | 1.394455  |
| C    | 3.063146  | 0.021462  | 0.064625  |
| C    | 3.547504  | 0.932658  | 1.025361  |
| C    | 3.612739  | -0.081702 | -1.228683 |
| C    | 4.620416  | 1.752664  | 0.653473  |
| C    | 4.679818  | 0.767423  | -1.547740 |
| C    | 5.182471  | 1.673223  | -0.617818 |
| C    | 2.951333  | 1.054903  | 2.424959  |
| C    | 3.098586  | -1.073470 | -2.267346 |
| C    | 2.521637  | -0.347335 | -3.497875 |
| C    | 4.189673  | -2.083522 | -2.673199 |
| C    | 2.338995  | 2.450263  | 2.659494  |
| C    | 3.988990  | 0.705161  | 3.510168  |
| C    | -1.360501 | -1.997182 | 0.865504  |
| C    | -2.130809 | -1.321766 | 1.834097  |
| C    | -1.915149 | -2.946922 | -0.017348 |
| C    | -3.497868 | -1.620990 | 1.894614  |
| C    | -4.072000 | -2.553443 | 1.035656  |
| C    | -3.286080 | -3.210281 | 0.092669  |
| C    | -1.527917 | -0.333267 | 2.827911  |
| C    | -2.285819 | 1.006438  | 2.859864  |
| C    | -1.448756 | -0.959637 | 4.235624  |

|   |           |           |           |
|---|-----------|-----------|-----------|
| C | -1.079264 | -3.698363 | -1.050734 |
| C | -1.677439 | -3.613224 | -2.467886 |
| C | -0.881063 | -5.170580 | -0.634310 |
| H | 3.207082  | -2.368388 | 1.433647  |
| H | 0.706986  | -3.486952 | 1.918165  |
| H | 5.124821  | 0.714245  | -2.537335 |
| H | 5.016108  | 2.467297  | 1.369585  |
| H | 2.279051  | -1.641014 | -1.817750 |
| H | 2.136468  | 0.330345  | 2.512266  |
| H | 5.039788  | -1.587712 | -3.156294 |
| H | 3.786345  | -2.816361 | -3.382185 |
| H | 4.573042  | -2.628485 | -1.802939 |
| H | 2.113736  | -1.073103 | -4.211670 |
| H | 3.289219  | 0.237669  | -4.018087 |
| H | 1.716706  | 0.333608  | -3.202326 |
| H | 4.830761  | 1.407584  | 3.503971  |
| H | 4.396540  | -0.303113 | 3.369960  |
| H | 3.528091  | 0.749717  | 4.503914  |
| H | 1.882406  | 2.493147  | 3.656300  |
| H | 1.569577  | 2.672199  | 1.912144  |
| H | 3.104371  | 3.234905  | 2.614973  |
| H | 6.013301  | 2.320895  | -0.885202 |
| H | -4.119877 | -1.116963 | 2.628106  |
| H | -5.135013 | -2.769722 | 1.101716  |
| H | -0.506527 | -0.110392 | 2.509008  |
| H | -2.343219 | 1.454886  | 1.863493  |
| H | -1.766573 | 1.711261  | 3.519486  |
| H | -3.307324 | 0.890359  | 3.241048  |
| H | -0.980946 | -0.260515 | 4.938956  |
| H | -0.858404 | -1.883357 | 4.232022  |
| H | -2.447045 | -1.203223 | 4.618788  |
| H | -0.091430 | -3.229682 | -1.092233 |
| H | -1.819640 | -2.573417 | -2.776716 |
| H | -2.645826 | -4.122330 | -2.534045 |
| H | -1.005121 | -4.095778 | -3.187202 |
| H | -0.405384 | -5.251959 | 0.349495  |
| H | -0.248326 | -5.694417 | -1.360686 |
| H | -1.840937 | -5.698017 | -0.582745 |
| H | -3.744601 | -3.937501 | -0.571122 |
| H | -0.916490 | -0.241448 | -2.830007 |
| C | -2.822111 | 2.296791  | -1.484350 |
| C | -2.877985 | 3.293391  | -0.496307 |
| C | -4.026623 | 1.883867  | -2.077305 |
| C | -4.098913 | 3.854481  | -0.113791 |
| H | -1.952922 | 3.614488  | -0.024923 |
| C | -5.246525 | 2.444095  | -1.696686 |
| H | -4.001945 | 1.118415  | -2.849153 |
| C | -5.287876 | 3.433434  | -0.711281 |
| H | -4.118301 | 4.622367  | 0.656020  |
| H | -6.165684 | 2.109417  | -2.172044 |
| H | -6.237400 | 3.871838  | -0.414380 |

TS7b  
B3LYP SCF energy:

-1712.56977078 a.u.

B3LYP enthalpy: -1711.878529 a.u.  
 B3LYP free energy: -1711.986488 a.u.  
 M06 SCF energy in solution: -3051.19454040 a.u.  
 M06 enthalpy in solution: -3050.503299 a.u.  
 M06 free energy in solution: -3050.611258 a.u.  
 Three lowest frequencies (cm-1): -1113.8631 13.1084 23.9659  
 Imaginary frequency: -1113.8631 cm-1

Cartesian coordinates

| ATOM | X         | Y         | Z         |
|------|-----------|-----------|-----------|
| Ni   | -0.871135 | 1.395618  | -0.285000 |
| Al   | 5.877013  | -0.392008 | 0.080502  |
| N    | 3.885359  | 0.215058  | -0.005271 |
| C    | 3.172047  | 0.522482  | 1.096043  |
| C    | 1.847831  | 0.940525  | 1.039337  |
| C    | 1.161831  | 1.035103  | -0.189902 |
| C    | 1.954470  | 0.757603  | -1.324881 |
| C    | 3.274436  | 0.346213  | -1.199423 |
| C    | 6.155923  | -0.694330 | 2.039035  |
| C    | 5.840212  | -2.041311 | -1.053609 |
| C    | 6.815314  | 1.187549  | -0.709383 |
| C    | -0.632718 | 3.437354  | -0.693545 |
| C    | -2.005364 | 3.068345  | -0.518010 |
| H    | 3.699011  | 0.420120  | 2.039370  |
| H    | 1.349970  | 1.178947  | 1.974711  |
| H    | 0.353525  | 2.333195  | -0.407121 |
| H    | 1.545771  | 0.858097  | -2.327429 |
| H    | 3.881882  | 0.107917  | -2.067542 |
| H    | 6.078898  | 0.216477  | 2.651511  |
| H    | 7.170205  | -1.084279 | 2.211828  |
| H    | 5.470963  | -1.436639 | 2.475363  |
| H    | 5.160633  | -2.812843 | -0.662853 |
| H    | 6.837726  | -2.503608 | -1.095653 |
| H    | 5.548164  | -1.860981 | -2.099113 |
| H    | 6.501198  | 1.410187  | -1.740012 |
| H    | 7.902301  | 1.022878  | -0.750510 |
| H    | 6.664822  | 2.108035  | -0.126695 |
| H    | -0.176315 | 4.088965  | 0.055715  |
| H    | -0.267524 | 3.622146  | -1.705239 |
| H    | -2.585089 | 2.977011  | -1.436069 |
| C    | -2.770685 | 3.606469  | 0.676398  |
| H    | -3.684691 | 3.039013  | 0.872395  |
| H    | -2.160778 | 3.585170  | 1.587689  |
| H    | -3.072587 | 4.652376  | 0.513896  |
| P    | -2.131272 | -0.511443 | -0.014192 |
| C    | -2.413483 | -0.774100 | 1.897151  |
| C    | -3.885044 | -0.538959 | -0.882292 |
| C    | -1.147504 | -2.055750 | -0.704145 |
| C    | -1.125554 | -0.316692 | 2.619513  |
| H    | -1.264417 | -0.436703 | 3.702468  |
| H    | -0.240490 | -0.885209 | 2.333681  |
| H    | -0.927333 | 0.742393  | 2.421917  |
| C    | -2.755225 | -2.212011 | 2.339958  |
| H    | -2.927114 | -2.211452 | 3.424821  |
| H    | -3.663064 | -2.595197 | 1.868549  |
| H    | -1.946073 | -2.918919 | 2.146565  |

|   |           |           |           |
|---|-----------|-----------|-----------|
| C | -3.533273 | 0.157798  | 2.408812  |
| H | -4.528773 | -0.153972 | 2.086194  |
| H | -3.528894 | 0.130889  | 3.506334  |
| H | -3.373625 | 1.195998  | 2.106211  |
| C | -4.613162 | 0.806170  | -0.666523 |
| H | -4.059949 | 1.634560  | -1.107092 |
| H | -5.588901 | 0.751235  | -1.167606 |
| H | -4.801749 | 1.037345  | 0.380983  |
| C | -4.835541 | -1.661592 | -0.409663 |
| H | -5.163336 | -1.517614 | 0.623108  |
| H | -5.738039 | -1.640304 | -1.035456 |
| H | -4.406526 | -2.660498 | -0.493286 |
| C | -3.695616 | -0.662340 | -2.411513 |
| H | -4.657036 | -0.454392 | -2.898779 |
| H | -2.969979 | 0.063684  | -2.794091 |
| H | -3.388553 | -1.661648 | -2.725538 |
| C | -1.938881 | -3.372961 | -0.847256 |
| H | -2.726070 | -3.312764 | -1.602067 |
| H | -1.243988 | -4.157498 | -1.175482 |
| H | -2.386063 | -3.709986 | 0.090901  |
| C | -0.585624 | -1.678121 | -2.096261 |
| H | 0.125227  | -2.453658 | -2.410171 |
| H | -1.354275 | -1.613686 | -2.866590 |
| H | -0.048404 | -0.729228 | -2.066092 |
| C | 0.075513  | -2.338810 | 0.197862  |
| H | -0.200429 | -2.739484 | 1.175536  |
| H | 0.695777  | -3.098610 | -0.294561 |
| H | 0.696740  | -1.454245 | 0.342340  |

TS8b

|                                               |                |                  |
|-----------------------------------------------|----------------|------------------|
| B3LYP SCF energy:                             | -1712.57527638 | a.u.             |
| B3LYP enthalpy:                               | -1711.884431   | a.u.             |
| B3LYP free energy:                            | -1711.994744   | a.u.             |
| M06 SCF energy in solution:                   | -3051.19983811 | a.u.             |
| M06 enthalpy in solution:                     | -3050.508993   | a.u.             |
| M06 free energy in solution:                  | -3050.619306   | a.u.             |
| Three lowest frequencies (cm <sup>-1</sup> ): | -1028.7552     | 8.6076 12.7126   |
| Imaginary frequency:                          | -1028.7552     | cm <sup>-1</sup> |

Cartesian coordinates

| ATOM | X         | Y         | Z         |
|------|-----------|-----------|-----------|
| Ni   | -0.871390 | 1.376436  | -0.291663 |
| Al   | 5.742007  | -0.577155 | 0.034237  |
| N    | 3.789169  | 0.140172  | -0.046341 |
| C    | 3.119252  | 0.546942  | 1.050469  |
| C    | 1.804040  | 0.991607  | 1.003777  |
| C    | 1.085697  | 1.013440  | -0.210441 |
| C    | 1.829823  | 0.628735  | -1.347898 |
| C    | 3.142866  | 0.195730  | -1.229182 |
| C    | 6.654167  | 0.567306  | -1.330036 |
| C    | 6.255678  | -0.242038 | 1.939246  |
| C    | 5.486024  | -2.495037 | -0.477779 |
| C    | -0.833645 | 3.491366  | -0.556169 |
| C    | -2.143501 | 2.933699  | -0.558121 |

|   |           |           |           |
|---|-----------|-----------|-----------|
| H | 3.675567  | 0.503965  | 1.981429  |
| H | 1.335746  | 1.308033  | 1.932393  |
| H | 0.279229  | 2.362868  | -0.440635 |
| H | 1.380914  | 0.648526  | -2.337945 |
| H | 3.717803  | -0.121611 | -2.094270 |
| H | 6.243434  | 0.464154  | -2.345697 |
| H | 7.719512  | 0.303579  | -1.407826 |
| H | 6.619843  | 1.638064  | -1.081638 |
| H | 6.209265  | 0.817317  | 2.232692  |
| H | 7.299306  | -0.551544 | 2.100208  |
| H | 5.661204  | -0.807440 | 2.672551  |
| H | 4.861749  | -3.049389 | 0.238260  |
| H | 6.449825  | -3.023989 | -0.520343 |
| H | 5.023833  | -2.624765 | -1.467887 |
| H | -0.430681 | 3.790522  | -1.526889 |
| H | -2.673892 | 2.864683  | -1.504540 |
| H | -2.776038 | 3.105520  | 0.310171  |
| C | -0.344717 | 4.339697  | 0.608900  |
| H | 0.748308  | 4.357195  | 0.683176  |
| H | -0.686510 | 5.374598  | 0.481515  |
| H | -0.744168 | 3.971533  | 1.559977  |
| P | -2.131909 | -0.518969 | 0.020413  |
| C | -1.210685 | -2.223607 | -0.265285 |
| C | -2.794202 | -0.510906 | 1.853811  |
| C | -3.665921 | -0.497418 | -1.194748 |
| C | -4.432579 | -1.826708 | -1.363475 |
| H | -4.827642 | -2.210228 | -0.419137 |
| H | -5.290936 | -1.649086 | -2.025463 |
| H | -3.831509 | -2.610492 | -1.828760 |
| C | -4.692414 | 0.564392  | -0.739703 |
| H | -4.237270 | 1.542049  | -0.584839 |
| H | -5.447998 | 0.672291  | -1.529069 |
| H | -5.223843 | 0.278269  | 0.170355  |
| C | -3.154481 | -0.045473 | -2.584913 |
| H | -2.496460 | -0.775203 | -3.057600 |
| H | -4.017214 | 0.094754  | -3.249793 |
| H | -2.617627 | 0.904457  | -2.523662 |
| C | -4.011213 | -1.417191 | 2.134190  |
| H | -4.243123 | -1.370753 | 3.206924  |
| H | -4.908699 | -1.095825 | 1.601246  |
| H | -3.825737 | -2.464432 | 1.887916  |
| C | -1.658466 | -0.922805 | 2.817283  |
| H | -0.737705 | -0.360087 | 2.633412  |
| H | -1.979340 | -0.705149 | 3.844357  |
| H | -1.430025 | -1.989540 | 2.773146  |
| C | -3.157965 | 0.942693  | 2.234437  |
| H | -3.968503 | 1.359982  | 1.635881  |
| H | -3.480191 | 0.959810  | 3.284154  |
| H | -2.290033 | 1.601330  | 2.135174  |
| C | -1.955644 | -3.471414 | 0.257656  |
| H | -1.409069 | -4.365211 | -0.071671 |
| H | -1.983090 | -3.504078 | 1.350193  |
| H | -2.977791 | -3.560602 | -0.111202 |
| C | 0.187140  | -2.209157 | 0.397640  |
| H | 0.649621  | -3.190614 | 0.228295  |
| H | 0.837302  | -1.459666 | -0.048328 |

|   |           |           |           |
|---|-----------|-----------|-----------|
| H | 0.166695  | -2.045314 | 1.473571  |
| C | -0.940529 | -2.395755 | -1.777375 |
| H | -0.249122 | -3.237248 | -1.912572 |
| H | -1.838183 | -2.624291 | -2.354807 |
| H | -0.461824 | -1.509372 | -2.206430 |

TS1e

|                                  |                     |         |         |
|----------------------------------|---------------------|---------|---------|
| B3LYP SCF energy:                | -1217.80501994 a.u. |         |         |
| B3LYP enthalpy:                  | -1217.272436 a.u.   |         |         |
| B3LYP free energy:               | -1217.354577 a.u.   |         |         |
| M06 SCF energy in solution:      | -2556.55125486 a.u. |         |         |
| M06 enthalpy in solution:        | -2556.018671 a.u.   |         |         |
| M06 free energy in solution:     | -2556.100812 a.u.   |         |         |
| Three lowest frequencies (cm-1): | -1225.0929          | 33.9464 | 65.0116 |
| Imaginary frequency:             | -1225.0929 cm-1     |         |         |

Cartesian coordinates

| ATOM | X         | Y         | Z         |
|------|-----------|-----------|-----------|
| Ni   | 1.509581  | -0.122286 | -0.299120 |
| P    | -0.714889 | -0.002254 | -0.008018 |
| C    | -1.786825 | -1.420760 | -0.799065 |
| C    | -1.731685 | -1.308568 | -2.339431 |
| C    | -1.152787 | -2.789713 | -0.462476 |
| C    | -3.265591 | -1.446124 | -0.358894 |
| H    | -2.285743 | -0.452077 | -2.727866 |
| H    | -0.701790 | -1.254505 | -2.707101 |
| H    | -2.188287 | -2.210176 | -2.768513 |
| H    | -1.142343 | -3.014684 | 0.603732  |
| H    | -1.741580 | -3.575052 | -0.955629 |
| H    | -0.129204 | -2.851928 | -0.834432 |
| H    | -3.791329 | -2.223950 | -0.929308 |
| H    | -3.379109 | -1.696784 | 0.699086  |
| H    | -3.782757 | -0.502124 | -0.541417 |
| C    | -1.118619 | 0.095256  | 1.892318  |
| C    | -2.467304 | 0.746711  | 2.261710  |
| C    | -1.079072 | -1.317814 | 2.514689  |
| C    | 0.029598  | 0.883513  | 2.567615  |
| H    | -2.526792 | 1.794206  | 1.957561  |
| H    | -3.322249 | 0.218685  | 1.831526  |
| H    | -2.585384 | 0.722025  | 3.353892  |
| H    | -0.156234 | -1.850121 | 2.264776  |
| H    | -1.114467 | -1.215129 | 3.607202  |
| H    | -1.931218 | -1.936020 | 2.223738  |
| H    | -0.139408 | 0.892102  | 3.653080  |
| H    | 0.998421  | 0.408249  | 2.380524  |
| H    | 0.098070  | 1.919027  | 2.236024  |
| C    | -1.224065 | 1.680836  | -0.852593 |
| C    | -0.469331 | 1.769291  | -2.203546 |
| C    | -2.733139 | 1.891976  | -1.088402 |
| C    | -0.688029 | 2.861446  | -0.012578 |
| H    | 0.612478  | 1.755923  | -2.041971 |
| H    | -0.735139 | 0.979698  | -2.906767 |
| H    | -0.723716 | 2.727520  | -2.677370 |
| H    | -3.319146 | 1.839795  | -0.166210 |
| H    | -2.882911 | 2.894571  | -1.511462 |

|   |           |           |           |
|---|-----------|-----------|-----------|
| H | -3.155820 | 1.180737  | -1.802416 |
| H | -0.851419 | 3.785517  | -0.583203 |
| H | -1.205081 | 2.980886  | 0.942273  |
| H | 0.387442  | 2.765046  | 0.153331  |
| O | 2.451224  | 1.725986  | -0.449573 |
| C | 2.285930  | -1.859434 | -0.517432 |
| C | 3.355465  | -0.857497 | -0.753533 |
| H | 4.171504  | -0.881534 | -0.023123 |
| H | 3.731095  | -0.817040 | -1.780602 |
| C | 3.074762  | 2.307607  | 0.667548  |
| H | 3.659897  | 1.580015  | 1.261864  |
| H | 3.770311  | 3.101900  | 0.351930  |
| H | 2.344953  | 2.766699  | 1.356716  |
| H | 3.045632  | 0.476372  | -0.655011 |
| H | 1.934823  | -2.373318 | -1.416554 |
| C | 2.400012  | -2.774084 | 0.688440  |
| H | 1.447964  | -3.265655 | 0.917442  |
| H | 3.140565  | -3.571511 | 0.518043  |
| H | 2.717345  | -2.223293 | 1.582209  |

TS2e

|                                  |                     |         |         |
|----------------------------------|---------------------|---------|---------|
| B3LYP SCF energy:                | -1217.80208942 a.u. |         |         |
| B3LYP enthalpy:                  | -1217.269688 a.u.   |         |         |
| B3LYP free energy:               | -1217.352838 a.u.   |         |         |
| M06 SCF energy in solution:      | -2556.54874922 a.u. |         |         |
| M06 enthalpy in solution:        | -2556.016348 a.u.   |         |         |
| M06 free energy in solution:     | -2556.099498 a.u.   |         |         |
| Three lowest frequencies (cm-1): | -1295.0733          | 27.1599 | 48.8007 |
| Imaginary frequency:             | -1295.0733 cm-1     |         |         |

Cartesian coordinates

| ATOM | X         | Y         | Z         |
|------|-----------|-----------|-----------|
| Ni   | -1.415571 | -0.263328 | 0.111049  |
| P    | 0.811442  | -0.033891 | -0.037252 |
| C    | 1.158786  | 1.763928  | -0.693005 |
| C    | 0.272864  | 1.991262  | -1.943885 |
| C    | 0.657563  | 2.772724  | 0.366770  |
| C    | 2.619489  | 2.100609  | -1.052747 |
| H    | 0.591189  | 1.413689  | -2.811965 |
| H    | -0.774960 | 1.755227  | -1.739596 |
| H    | 0.328267  | 3.052495  | -2.221519 |
| H    | 1.301360  | 2.813358  | 1.248661  |
| H    | 0.668529  | 3.775445  | -0.081047 |
| H    | -0.367743 | 2.550946  | 0.680073  |
| H    | 2.674302  | 3.158622  | -1.343883 |
| H    | 3.307049  | 1.958764  | -0.214909 |
| H    | 2.989740  | 1.518637  | -1.901477 |
| C    | 1.469061  | -0.181564 | 1.788512  |
| C    | 2.835357  | 0.478698  | 2.064848  |
| C    | 0.404545  | 0.440078  | 2.725748  |
| C    | 1.557079  | -1.670147 | 2.191575  |
| H    | 3.634116  | 0.081114  | 1.433179  |
| H    | 2.808474  | 1.563493  | 1.938062  |
| H    | 3.117676  | 0.284650  | 3.108742  |

|   |           |           |           |
|---|-----------|-----------|-----------|
| H | -0.560064 | -0.066577 | 2.618819  |
| H | 0.739826  | 0.315726  | 3.764666  |
| H | 0.235443  | 1.502368  | 2.556125  |
| H | 1.735809  | -1.724765 | 3.273412  |
| H | 0.623034  | -2.201308 | 1.984759  |
| H | 2.378681  | -2.199780 | 1.704132  |
| C | 1.787746  | -1.291534 | -1.152847 |
| C | 1.524197  | -0.966877 | -2.639890 |
| C | 3.313350  | -1.321562 | -0.923414 |
| C | 1.224094  | -2.715048 | -0.934258 |
| H | 0.454119  | -0.875281 | -2.853042 |
| H | 2.027984  | -0.056980 | -2.972402 |
| H | 1.913259  | -1.792272 | -3.250311 |
| H | 3.579398  | -1.698148 | 0.067507  |
| H | 3.768036  | -2.001869 | -1.656473 |
| H | 3.781685  | -0.343412 | -1.052976 |
| H | 1.758018  | -3.404585 | -1.602135 |
| H | 1.350848  | -3.084672 | 0.082684  |
| H | 0.161857  | -2.759861 | -1.179564 |
| C | -2.035228 | -2.063530 | 0.067162  |
| C | -3.218387 | -1.226246 | 0.351070  |
| H | -1.999638 | -2.546435 | -0.912428 |
| H | -1.655802 | -2.704319 | 0.865390  |
| O | -2.455574 | 1.437282  | 0.638914  |
| H | -2.975746 | 0.144871  | 0.527282  |
| C | -3.096298 | 2.289550  | -0.277947 |
| H | -3.977185 | 2.766665  | 0.182687  |
| H | -2.424348 | 3.099679  | -0.607631 |
| H | -3.444202 | 1.770554  | -1.188922 |
| C | -4.335182 | -1.193219 | -0.698098 |
| H | -4.917155 | -2.123598 | -0.677523 |
| H | -5.031820 | -0.363462 | -0.530668 |
| H | -3.921961 | -1.081609 | -1.707305 |
| H | -3.603352 | -1.356787 | 1.370126  |

TS3e

|                                  |                     |         |         |
|----------------------------------|---------------------|---------|---------|
| B3LYP SCF energy:                | -1758.56453527 a.u. |         |         |
| B3LYP enthalpy:                  | -1757.793423 a.u.   |         |         |
| B3LYP free energy:               | -1757.902016 a.u.   |         |         |
| M06 SCF energy in solution:      | -3097.08608773 a.u. |         |         |
| M06 enthalpy in solution:        | -3096.314975 a.u.   |         |         |
| M06 free energy in solution:     | -3096.423568 a.u.   |         |         |
| Three lowest frequencies (cm-1): | -543.3306           | 12.0676 | 15.1159 |
| Imaginary frequency:             | -543.3306 cm-1      |         |         |

Cartesian coordinates

| ATOM | X         | Y         | Z         |
|------|-----------|-----------|-----------|
| Ni   | 0.316139  | -1.005917 | -1.610709 |
| C    | -1.239510 | 0.111045  | -1.816981 |
| O    | -1.195220 | 1.136509  | -2.482788 |
| C    | -2.555310 | -0.284710 | -1.123632 |
| H    | -2.776919 | -1.323327 | -1.405538 |
| H    | -2.377338 | -0.313429 | -0.039107 |
| C    | -3.747152 | 0.638109  | -1.444836 |



|   |           |           |           |
|---|-----------|-----------|-----------|
| H | -3.481419 | 1.665878  | -1.173462 |
| H | -3.904463 | 0.642401  | -2.529583 |
| C | -5.011001 | 0.215892  | -0.730568 |
| C | -5.872980 | -0.738223 | -1.291633 |
| C | -5.339477 | 0.741940  | 0.527390  |
| C | -7.020959 | -1.157322 | -0.617780 |
| H | -5.641964 | -1.151747 | -2.271441 |
| C | -6.486379 | 0.327027  | 1.206338  |
| H | -4.689844 | 1.491579  | 0.975472  |
| C | -7.332193 | -0.626452 | 0.636010  |
| H | -7.676119 | -1.894928 | -1.074795 |
| H | -6.722757 | 0.753240  | 2.178307  |
| H | -8.227853 | -0.948708 | 1.160593  |
| C | 0.776369  | -2.540680 | -2.993277 |
| H | 0.988053  | -2.063307 | -3.947672 |
| H | 0.070508  | -3.367658 | -3.055074 |
| H | -0.579092 | -1.516378 | -2.710197 |
| P | 1.289995  | 0.085098  | 0.127032  |
| C | 1.159105  | -0.992814 | 1.676967  |
| C | 1.843596  | -0.576342 | 3.000184  |
| C | -0.310305 | -1.389340 | 1.946378  |
| H | 1.664861  | -1.906518 | 1.335848  |
| C | 1.782485  | -1.728994 | 4.019557  |
| H | 1.337074  | 0.288471  | 3.437357  |
| H | 2.882490  | -0.271412 | 2.838848  |
| C | -0.405501 | -2.507632 | 2.999335  |
| H | -0.871658 | -0.510125 | 2.294928  |
| H | -0.784752 | -1.717694 | 1.014712  |
| C | 0.330262  | -2.145704 | 4.297269  |
| H | 2.276149  | -1.425059 | 4.951617  |
| H | 2.345513  | -2.591848 | 3.633607  |
| H | -1.459604 | -2.730784 | 3.207555  |
| H | 0.030948  | -3.426125 | 2.580004  |
| H | 0.301973  | -2.990080 | 4.997625  |
| H | -0.192560 | -1.312913 | 4.790756  |
| C | 0.448666  | 1.751739  | 0.494492  |
| C | 0.655549  | 2.398968  | 1.879421  |
| C | 0.743235  | 2.790139  | -0.614351 |
| H | -0.616133 | 1.493100  | 0.412450  |
| C | -0.185449 | 3.682728  | 2.035932  |
| H | 1.718928  | 2.635201  | 2.030977  |
| H | 0.366126  | 1.709358  | 2.675265  |
| C | -0.135613 | 4.041747  | -0.461273 |
| H | 1.794908  | 3.099592  | -0.543680 |
| H | 0.582177  | 2.349373  | -1.601058 |
| C | 0.062144  | 4.695309  | 0.911561  |
| H | 0.020015  | 4.134556  | 3.015240  |
| H | -1.250203 | 3.405582  | 2.039351  |
| H | 0.099119  | 4.753146  | -1.263107 |
| H | -1.188703 | 3.757661  | -0.595864 |
| H | -0.602566 | 5.560750  | 1.029313  |
| H | 1.091051  | 5.078652  | 0.985589  |
| C | 3.134419  | 0.491645  | -0.056760 |
| C | 4.082987  | -0.679202 | 0.294125  |
| C | 3.459933  | 0.967683  | -1.495128 |
| H | 3.345201  | 1.317719  | 0.639797  |

|   |          |           |           |
|---|----------|-----------|-----------|
| C | 5.560014 | -0.262569 | 0.169650  |
| H | 3.889644 | -1.517250 | -0.386480 |
| H | 3.904460 | -1.053167 | 1.305273  |
| C | 4.932088 | 1.391283  | -1.634984 |
| H | 3.248118 | 0.143952  | -2.189193 |
| H | 2.813028 | 1.791868  | -1.799865 |
| C | 5.889865 | 0.262232  | -1.233753 |
| H | 6.203285 | -1.115914 | 0.420593  |
| H | 5.776296 | 0.519970  | 0.912145  |
| H | 5.125912 | 1.708409  | -2.667596 |
| H | 5.117253 | 2.270172  | -0.999343 |
| H | 6.930952 | 0.606542  | -1.278199 |
| H | 5.801011 | -0.561462 | -1.957444 |
| C | 1.740730 | -2.528337 | -1.972414 |
| H | 2.683325 | -2.033806 | -2.195654 |
| C | 1.798492 | -3.646360 | -0.951909 |
| H | 2.295725 | -4.537398 | -1.364826 |
| H | 2.356995 | -3.362852 | -0.053761 |
| H | 0.794144 | -3.952970 | -0.635590 |

TS4e

|                                               |                            |         |         |
|-----------------------------------------------|----------------------------|---------|---------|
| B3LYP SCF energy:                             | -1758.56880486 a.u.        |         |         |
| B3LYP enthalpy:                               | -1757.797951 a.u.          |         |         |
| B3LYP free energy:                            | -1757.906715 a.u.          |         |         |
| M06 SCF energy in solution:                   | -3097.08915101 a.u.        |         |         |
| M06 enthalpy in solution:                     | -3096.318297 a.u.          |         |         |
| M06 free energy in solution:                  | -3096.427061 a.u.          |         |         |
| Three lowest frequencies (cm <sup>-1</sup> ): | -500.3481                  | 12.9182 | 15.6069 |
| Imaginary frequency:                          | -500.3481 cm <sup>-1</sup> |         |         |

Cartesian coordinates

| ATOM | X         | Y         | Z         |
|------|-----------|-----------|-----------|
| Ni   | 0.309382  | -1.505506 | -1.080038 |
| C    | -1.210098 | -0.509883 | -1.677515 |
| O    | -1.139850 | 0.194694  | -2.675390 |
| C    | -2.538043 | -0.598388 | -0.904717 |
| H    | -2.891521 | -1.633959 | -1.017276 |
| H    | -2.335534 | -0.480787 | 0.169185  |
| C    | -3.617777 | 0.395523  | -1.374713 |
| H    | -3.249464 | 1.418475  | -1.229684 |
| H    | -3.751813 | 0.272912  | -2.454826 |
| C    | -4.932495 | 0.210334  | -0.651480 |
| C    | -5.884847 | -0.709534 | -1.115356 |
| C    | -5.224465 | 0.928370  | 0.517274  |
| C    | -7.085591 | -0.909965 | -0.433341 |
| H    | -5.682169 | -1.269878 | -2.025961 |
| C    | -6.424000 | 0.732623  | 1.203948  |
| H    | -4.503997 | 1.654787  | 0.888802  |
| C    | -7.360046 | -0.189241 | 0.731176  |
| H    | -7.810390 | -1.624888 | -0.815014 |
| H    | -6.630055 | 1.304827  | 2.105280  |
| H    | -8.296421 | -0.340753 | 1.261728  |
| C    | 0.681387  | -3.589561 | -1.465536 |
| H    | -0.585884 | -2.467731 | -1.826996 |

|   |           |           |           |
|---|-----------|-----------|-----------|
| P | 1.338417  | 0.133901  | 0.097089  |
| C | 1.470071  | -0.469193 | 1.886630  |
| C | 2.227258  | 0.348794  | 2.958768  |
| C | 0.082459  | -0.884974 | 2.426373  |
| H | 2.038907  | -1.399333 | 1.742670  |
| C | 2.390256  | -0.481130 | 4.245727  |
| H | 1.672394  | 1.256828  | 3.209927  |
| H | 3.205915  | 0.679400  | 2.596396  |
| C | 0.210069  | -1.678324 | 3.739130  |
| H | -0.530596 | 0.011804  | 2.598982  |
| H | -0.446034 | -1.487090 | 1.677344  |
| C | 1.025489  | -0.920259 | 4.797357  |
| H | 2.933233  | 0.105394  | 4.998011  |
| H | 3.005925  | -1.368577 | 4.036509  |
| H | -0.788345 | -1.917918 | 4.126685  |
| H | 0.700741  | -2.639400 | 3.525232  |
| H | 1.156654  | -1.542285 | 5.691833  |
| H | 0.464955  | -0.028989 | 5.116092  |
| C | 0.414338  | 1.796774  | 0.082185  |
| C | 0.651184  | 2.778803  | 1.248219  |
| C | 0.589368  | 2.530567  | -1.269600 |
| H | -0.634718 | 1.473510  | 0.137044  |
| C | -0.245748 | 4.027219  | 1.133441  |
| H | 1.706531  | 3.087334  | 1.273542  |
| H | 0.437695  | 2.294471  | 2.203776  |
| C | -0.331682 | 3.757371  | -1.371806 |
| H | 1.629581  | 2.873302  | -1.360284 |
| H | 0.383609  | 1.850690  | -2.099822 |
| C | -0.093774 | 4.736995  | -0.216597 |
| H | -0.020881 | 4.713930  | 1.959911  |
| H | -1.294500 | 3.719865  | 1.260765  |
| H | -0.170727 | 4.253950  | -2.337012 |
| H | -1.378963 | 3.422731  | -1.366078 |
| H | -0.786675 | 5.585854  | -0.279469 |
| H | 0.921153  | 5.154669  | -0.297207 |
| C | 3.109628  | 0.539210  | -0.446347 |
| C | 4.195518  | -0.396400 | 0.136943  |
| C | 3.221112  | 0.518386  | -1.991735 |
| H | 3.321881  | 1.560444  | -0.094653 |
| C | 5.602527  | 0.027532  | -0.324000 |
| H | 4.005798  | -1.424790 | -0.193687 |
| H | 4.170188  | -0.411655 | 1.229496  |
| C | 4.621005  | 0.942452  | -2.466873 |
| H | 3.008502  | -0.500753 | -2.341448 |
| H | 2.466765  | 1.158432  | -2.452995 |
| C | 5.718167  | 0.062944  | -1.853536 |
| H | 6.348122  | -0.657265 | 0.100430  |
| H | 5.828119  | 1.024895  | 0.082042  |
| H | 4.664786  | 0.900250  | -3.562606 |
| H | 4.796018  | 1.992502  | -2.188518 |
| H | 6.711349  | 0.421163  | -2.153054 |
| H | 5.622338  | -0.960089 | -2.246311 |
| C | 1.758480  | -2.959566 | -0.819043 |
| H | 2.635880  | -2.685324 | -1.397263 |
| H | 1.927656  | -3.147218 | 0.239559  |
| C | -0.204424 | -4.586885 | -0.742300 |

|   |           |           |           |
|---|-----------|-----------|-----------|
| H | 0.277662  | -5.573769 | -0.748956 |
| H | -0.358016 | -4.296416 | 0.302093  |
| H | -1.186268 | -4.686414 | -1.215790 |
| H | 0.778484  | -3.762592 | -2.536615 |

TS7c

|                                  |                     |         |         |
|----------------------------------|---------------------|---------|---------|
| B3LYP SCF energy:                | -2249.48391187 a.u. |         |         |
| B3LYP enthalpy:                  | -2248.523252 a.u.   |         |         |
| B3LYP free energy:               | -2248.667400 a.u.   |         |         |
| M06 SCF energy in solution:      | -3587.78121199 a.u. |         |         |
| M06 enthalpy in solution:        | -3586.820552 a.u.   |         |         |
| M06 free energy in solution:     | -3586.964700 a.u.   |         |         |
| Three lowest frequencies (cm-1): | -311.6494           | 14.5997 | 20.1117 |
| Imaginary frequency:             | -311.6494 cm-1      |         |         |

Cartesian coordinates

| ATOM | X         | Y         | Z         |
|------|-----------|-----------|-----------|
| Ni   | -0.448761 | 0.105290  | -1.242244 |
| Al   | 6.386474  | -0.204979 | -1.286278 |
| N    | -0.568703 | 0.092634  | 1.822329  |
| N    | -1.957808 | -1.297179 | 0.932505  |
| N    | 4.319476  | -0.174654 | -1.331012 |
| C    | -0.996564 | -0.362272 | 0.598476  |
| C    | -1.251659 | -0.521342 | 2.869018  |
| C    | -2.112175 | -1.401119 | 2.314039  |
| C    | 3.657549  | 0.926788  | -0.917395 |
| C    | 2.274094  | 1.007245  | -0.875344 |
| C    | 1.464825  | -0.084830 | -1.261905 |
| C    | 2.184715  | -1.213731 | -1.707648 |
| C    | 3.574073  | -1.226718 | -1.725355 |
| C    | 6.836369  | -1.975120 | -2.108245 |
| C    | 6.866553  | 1.405013  | -2.374461 |
| C    | 6.754971  | -0.041811 | 0.678418  |
| C    | -1.719569 | 0.134731  | -2.945226 |
| C    | -2.395953 | 0.793337  | -1.921203 |
| C    | 0.565174  | 0.953088  | 2.101935  |
| C    | 0.417609  | 2.353268  | 2.010283  |
| C    | 1.757901  | 0.343735  | 2.547931  |
| C    | 1.528317  | 3.139879  | 2.340228  |
| C    | 2.833742  | 1.182574  | 2.867628  |
| C    | 2.725841  | 2.563906  | 2.758183  |
| C    | -0.909100 | 3.004772  | 1.630140  |
| C    | 1.909633  | -1.164416 | 2.743742  |
| C    | 3.149338  | -1.741478 | 2.036590  |
| C    | 1.941538  | -1.515406 | 4.246993  |
| C    | -0.744939 | 4.378374  | 0.960986  |
| C    | -1.828648 | 3.128609  | 2.864926  |
| C    | -2.690792 | -2.171205 | 0.037577  |
| C    | -4.082318 | -1.977621 | -0.122652 |
| C    | -2.011711 | -3.257714 | -0.565576 |
| C    | -4.776409 | -2.878136 | -0.942832 |
| C    | -4.124258 | -3.927512 | -1.577670 |
| C    | -2.758101 | -4.113311 | -1.385094 |
| C    | -4.867815 | -0.869302 | 0.580519  |

|   |           |           |           |
|---|-----------|-----------|-----------|
| C | -5.861778 | -0.154182 | -0.357839 |
| C | -5.636516 | -1.419368 | 1.802279  |
| C | -0.542632 | -3.567509 | -0.277647 |
| C | 0.160110  | -4.332543 | -1.412244 |
| C | -0.408855 | -4.360342 | 1.041878  |
| H | -1.042681 | -0.282394 | 3.899077  |
| H | -2.803481 | -2.096973 | 2.759363  |
| H | 4.280206  | 1.762624  | -0.612101 |
| H | 1.831952  | 1.934314  | -0.524774 |
| H | 0.112539  | 0.258375  | -2.606041 |
| H | 1.666035  | -2.096191 | -2.068089 |
| H | 4.131272  | -2.093740 | -2.066796 |
| H | 6.470895  | -2.841647 | -1.536792 |
| H | 7.928977  | -2.093231 | -2.164998 |
| H | 6.468035  | -2.089808 | -3.138662 |
| H | 6.508278  | 1.338104  | -3.412078 |
| H | 7.958347  | 1.529483  | -2.432280 |
| H | 6.475252  | 2.348871  | -1.965854 |
| H | 6.286065  | 0.845565  | 1.130609  |
| H | 7.832954  | 0.045748  | 0.880390  |
| H | 6.403423  | -0.913710 | 1.249937  |
| H | 3.769835  | 0.745047  | 3.200116  |
| H | 1.456083  | 4.219810  | 2.274546  |
| H | 1.036470  | -1.658281 | 2.307749  |
| H | -1.408975 | 2.353424  | 0.906556  |
| H | 2.815419  | -1.069609 | 4.735985  |
| H | 2.000037  | -2.601652 | 4.383245  |
| H | 1.049857  | -1.155745 | 4.772845  |
| H | 3.184123  | -2.828110 | 2.182321  |
| H | 4.083293  | -1.329486 | 2.432896  |
| H | 3.123102  | -1.542585 | 0.963094  |
| H | -1.370894 | 3.771800  | 3.626361  |
| H | -2.031973 | 2.155599  | 3.324463  |
| H | -2.789464 | 3.573320  | 2.579509  |
| H | -1.711642 | 4.718516  | 0.580374  |
| H | -0.050692 | 4.335781  | 0.115514  |
| H | -0.383148 | 5.137174  | 1.665149  |
| H | 3.574341  | 3.195982  | 3.006035  |
| H | -5.844585 | -2.751314 | -1.086442 |
| H | -4.681119 | -4.609618 | -2.214403 |
| H | -4.153896 | -0.120908 | 0.941827  |
| H | -5.386715 | 0.185237  | -1.282944 |
| H | -6.288738 | 0.719353  | 0.148272  |
| H | -6.699208 | -0.805159 | -0.632295 |
| H | -6.175459 | -0.610512 | 2.309433  |
| H | -4.974115 | -1.890688 | 2.534541  |
| H | -6.371852 | -2.170350 | 1.490573  |
| H | -0.014172 | -2.617981 | -0.155935 |
| H | 0.020387  | -3.844253 | -2.383069 |
| H | -0.197074 | -5.365499 | -1.497678 |
| H | 1.234916  | -4.382115 | -1.208771 |
| H | -0.827975 | -3.814231 | 1.892737  |
| H | 0.647093  | -4.560322 | 1.258383  |
| H | -0.927621 | -5.324099 | 0.969647  |
| H | -2.266331 | -4.949247 | -1.869516 |
| H | -1.421739 | 0.661339  | -3.846335 |

|   |           |           |           |
|---|-----------|-----------|-----------|
| H | -1.846685 | -0.938827 | -3.065355 |
| H | -3.070262 | 0.219885  | -1.298998 |
| C | -2.567298 | 2.260149  | -1.895739 |
| C | -3.627926 | 2.830827  | -1.167200 |
| C | -1.743688 | 3.128191  | -2.640401 |
| C | -3.885436 | 4.200634  | -1.215154 |
| H | -4.274052 | 2.186178  | -0.578218 |
| C | -1.997739 | 4.497816  | -2.684453 |
| H | -0.898695 | 2.727253  | -3.192274 |
| C | -3.075750 | 5.042190  | -1.981397 |
| H | -4.725000 | 4.609780  | -0.658600 |
| H | -1.351174 | 5.143064  | -3.273551 |
| H | -3.277726 | 6.108830  | -2.025577 |

TS8c

|                                  |                     |         |         |
|----------------------------------|---------------------|---------|---------|
| B3LYP SCF energy:                | -2249.49037044 a.u. |         |         |
| B3LYP enthalpy:                  | -2248.530235 a.u.   |         |         |
| B3LYP free energy:               | -2248.677489 a.u.   |         |         |
| M06 SCF energy in solution:      | -3587.78612937 a.u. |         |         |
| M06 enthalpy in solution:        | -3586.825994 a.u.   |         |         |
| M06 free energy in solution:     | -3586.973248 a.u.   |         |         |
| Three lowest frequencies (cm-1): | -559.2022           | 16.4063 | 16.8832 |
| Imaginary frequency:             | -559.2022 cm-1      |         |         |

Cartesian coordinates

| ATOM | X         | Y         | Z         |
|------|-----------|-----------|-----------|
| Ni   | -0.503236 | 0.381284  | -0.940570 |
| Al   | 6.093119  | 1.686907  | 0.451320  |
| N    | -2.099215 | -1.128772 | 1.113779  |
| N    | -0.499671 | -2.326008 | 0.308315  |
| N    | 4.095476  | 1.321683  | 0.052874  |
| C    | -1.048922 | -1.068620 | 0.224705  |
| C    | -2.185705 | -2.380126 | 1.722998  |
| C    | -1.190927 | -3.134328 | 1.207087  |
| C    | 3.096759  | 1.974030  | 0.682615  |
| C    | 1.754878  | 1.740213  | 0.410328  |
| C    | 1.355156  | 0.778192  | -0.543531 |
| C    | 2.425238  | 0.124666  | -1.196790 |
| C    | 3.744059  | 0.410647  | -0.879460 |
| C    | 6.815215  | -0.164076 | 0.722352  |
| C    | 6.710151  | 2.608408  | -1.214384 |
| C    | 6.023108  | 2.820504  | 2.101506  |
| C    | -1.448010 | 1.597367  | -2.456364 |
| C    | -2.262873 | 0.568835  | -1.953116 |
| C    | -3.054958 | -0.086015 | 1.414212  |
| C    | -4.370995 | -0.215078 | 0.916377  |
| C    | -2.667972 | 0.979704  | 2.257514  |
| C    | -5.299872 | 0.772233  | 1.271431  |
| C    | -3.639578 | 1.937950  | 2.573980  |
| C    | -4.940895 | 1.839657  | 2.087082  |
| C    | -4.826341 | -1.392016 | 0.052751  |
| C    | -1.268995 | 1.066514  | 2.865531  |
| C    | -0.801831 | 2.509721  | 3.121966  |
| C    | -1.194343 | 0.245495  | 4.171601  |

|   |           |           |           |
|---|-----------|-----------|-----------|
| C | -5.590767 | -0.952901 | -1.212053 |
| C | -5.695327 | -2.369073 | 0.873838  |
| C | 0.688395  | -2.798534 | -0.366157 |
| C | 0.611800  | -3.163442 | -1.725738 |
| C | 1.870960  | -2.945232 | 0.391339  |
| C | 1.777446  | -3.649125 | -2.332729 |
| C | 2.962815  | -3.783830 | -1.615099 |
| C | 3.002741  | -3.442639 | -0.266433 |
| C | -0.686972 | -3.115256 | -2.525460 |
| C | -0.535053 | -2.335294 | -3.844461 |
| C | -1.217425 | -4.540454 | -2.785515 |
| C | 1.950093  | -2.626898 | 1.883920  |
| C | 3.100386  | -1.664487 | 2.231144  |
| C | 2.063843  | -3.924818 | 2.711569  |
| H | -2.940980 | -2.603675 | 2.458706  |
| H | -0.899288 | -4.155220 | 1.393586  |
| H | 3.408539  | 2.704514  | 1.422774  |
| H | 1.017608  | 2.329937  | 0.945777  |
| H | 0.207578  | 1.433577  | -1.721757 |
| H | 2.235831  | -0.623436 | -1.960640 |
| H | 4.567008  | -0.098315 | -1.372791 |
| H | 6.339800  | -0.688771 | 1.564466  |
| H | 7.891549  | -0.131874 | 0.949069  |
| H | 6.712465  | -0.816092 | -0.158246 |
| H | 6.589622  | 1.996309  | -2.120738 |
| H | 7.779303  | 2.862145  | -1.156420 |
| H | 6.178015  | 3.553072  | -1.398786 |
| H | 5.560512  | 3.807242  | 1.949558  |
| H | 7.044557  | 3.021269  | 2.458388  |
| H | 5.498210  | 2.344931  | 2.943652  |
| H | -0.970574 | 1.430660  | -3.420924 |
| H | -2.398989 | -0.331875 | -2.545077 |
| H | -3.064825 | 0.805214  | -1.263504 |
| H | -3.377011 | 2.770184  | 3.217882  |
| H | -6.318533 | 0.701136  | 0.902523  |
| H | -0.565918 | 0.625540  | 2.152786  |
| H | -3.936446 | -1.935133 | -0.280123 |
| H | -1.888215 | 0.643534  | 4.922027  |
| H | -0.182164 | 0.288305  | 4.590579  |
| H | -1.444903 | -0.807444 | 4.005444  |
| H | 0.255127  | 2.507515  | 3.409086  |
| H | -1.354696 | 2.984326  | 3.941200  |
| H | -0.911939 | 3.136487  | 2.230079  |
| H | -6.614761 | -1.880123 | 1.216770  |
| H | -5.169851 | -2.741462 | 1.759422  |
| H | -5.981776 | -3.233072 | 0.262846  |
| H | -5.816143 | -1.829607 | -1.830349 |
| H | -5.009233 | -0.251836 | -1.817605 |
| H | -6.546280 | -0.475331 | -0.967258 |
| H | -5.676911 | 2.594870  | 2.349452  |
| H | 1.751103  | -3.940036 | -3.378879 |
| H | 3.854982  | -4.163827 | -2.105489 |
| H | -1.436117 | -2.590726 | -1.926802 |
| H | -0.173294 | -1.318339 | -3.659140 |
| H | -1.501818 | -2.267097 | -4.357555 |
| H | 0.165612  | -2.823745 | -4.531225 |

|   |           |           |           |
|---|-----------|-----------|-----------|
| H | -2.173365 | -4.502790 | -3.321592 |
| H | -1.375811 | -5.084953 | -1.847703 |
| H | -0.514564 | -5.122131 | -3.393398 |
| H | 1.020993  | -2.129416 | 2.177294  |
| H | 2.999233  | -0.716208 | 1.698924  |
| H | 4.081515  | -2.084835 | 1.985550  |
| H | 3.094700  | -1.454306 | 3.307248  |
| H | 1.232667  | -4.611455 | 2.513542  |
| H | 2.064918  | -3.694130 | 3.783229  |
| H | 2.993650  | -4.459055 | 2.483963  |
| H | 3.930390  | -3.557833 | 0.285780  |
| C | -1.605673 | 3.039065  | -2.109707 |
| C | -2.259539 | 3.470472  | -0.943442 |
| C | -1.096796 | 4.010367  | -2.985256 |
| C | -2.402524 | 4.829912  | -0.670101 |
| H | -2.653122 | 2.741950  | -0.241473 |
| C | -1.239447 | 5.371026  | -2.712276 |
| H | -0.583819 | 3.694241  | -3.891132 |
| C | -1.893625 | 5.787263  | -1.551858 |
| H | -2.913333 | 5.142480  | 0.237140  |
| H | -0.838090 | 6.104515  | -3.406477 |
| H | -2.004834 | 6.846166  | -1.335133 |



## References

---

- 1 A. V. Marenich, C. J. Cramer and D. G. Truhlar, *J. Phys. Chem. B*, 2009, **113**, 6378-6396.
- 2 M. J. Frisch, G. W. Trucks, H. B. Schlegel, G. E. Scuseria, M. A. Robb, J. R. Cheeseman, G. Scalmani, V. Barone, B. Mennucci, G. A. Petersson, H. Nakatsuji, M. Caricato, X. Li, H. P. Hratchian, A. F. Izmaylov, J. Bloino, G. Zheng, J. L. Sonnenberg, M. Hada, M. Ehara, K. Toyota, R. Fukuda, J. Hasegawa, M. Ishida, T. Nakajima, Y. Honda, O. Kitao, H. Nakai, T. Vreven, J. A. Montgomery, Jr., J. E. Peralta, F. Ogliaro, M. Bearpark, J. J. Heyd, E. Brothers, K. N. Kudin, V. N. Staroverov, R. Kobayashi, J. Normand, K. Raghavachari, A. Rendell, J. C. Burant, S. S. Iyengar, J. Tomasi, M. Cossi, N. Rega, J. M. Millam, M. Klene, J. E. Knox, J. B. Cross, V. Bakken, C. Adamo, J. Jaramillo, R. Gomperts, R. E. Stratmann, O. Yazyev, A. J. Austin, R. Cammi, C. Pomelli, J. W. Ochterski, R. L. Martin, K. Morokuma, V. G. Zakrzewski, G. A. Voth, P. Salvador, J. J. Dannenberg, S. Dapprich, A. D. Daniels, Ö. Farkas, J. B. Foresman, J. V. Ortiz, J. Cioslowski and D. J. Fox, *Gaussian 09, Revision D.01*, Gaussian, Inc., Wallingford, CT, 2009.
- 3 Y. Shao, Z. Gan, E. Epifanovsky, A. T. B. Gilbert, J. Kussmann, A. W. Lange, D. Ghosh, M. Goldey, P. R. Horn, I. Kaliman, R. Z. Khaliullin, T. Kuš, E. I. Proynov, M. A. Rohrdanz, R. P. Steele, E. J. Sundstrom, P. M. Zimmerman, D. Zuev, B. Albrecht, E. Alguire, E. Berquist, K. Brandhorst, D. Casanova, Y. Chen, S. H. Chien, D. L. Crittenden, M. Diedenhofen, R. A. Distasio, A. D. Dutoi, R. G. Edgar, S. Fatehi, L. FustiMolnar, A. Ghysels, A. Golubeva-Zadorozhnaya, J. Gomes, M. W. D. Hanson-Heine, P. H. P. Harbach, E. G. Hohenstein, Z. C. Holden, T. Jagau, H. Ji, B. Kaduk, K. Khistyayev, P. Klunzinger, T. Kowalczyk, C. M. Krauter, K. V. Lawler, S. V. Levchenko, F. Liu, R. C. Lochan, S. Mao, A. V. Marenich, S. A. Maurer, C. M. Oana, R. OlivaresAmaya, D. P. O'Neill, T. M. Perrine, R. Peverati, A. Prociuk, D. R. Rehn, N. J. Russ, S. M. Sharada, S. Sharma, A. Sodt, T. Stein, D. Stück, Y. Su, T. Tsuchimochi, L. Vogt, O. Vydrov, M. A. Watson, J. Wenzel, J. Yang, S. Yeganeh, S. R. Yost, I. Y. Zhang, B. R. Brooks, G. K. L. Chan, D. M. Chipman, C. J. Cramer, M. S. Gordon, W. J. Hehre, A. Klamt, H. F. Schaefer, M. W. Schmidt, D. G. Truhlar, X. Xu, A. T. Bell, N. A. Besley, B. D. Dunietz, J. Kong, D. S. Lambrecht, W. Liang, C. Ochsenfeld, L. V. Slipchenko, J. E. Subotnik, T. Van Voorhis, J. M. Herbert, A. I. Krylov and P. M. W. Gill, Advances in molecular quantum chemistry contained in the Q-Chem 4 program package, *Mol. Phys.*, 2015, **113**, 184-215.
